# Supplementary material
Source: publisher site journal article supplement (http://static.cambridge.org/content/id/urn:cambridge.org:id:article:S1751731119003161/resource/name/S1751731119003161supp001.xlsx)
Supplement: Supplementary file 1 [file S1751731119003161supp001.xlsx]

## Sheet: Data collection Supplement
Source		Species		Digestion type	Digestion	Sorting help		Diet	Method	Details					Body mass	Intake			Food composition								Intake					Apparent digestibility (aD)						Digestible intake							Methane				Methane per energy
Authors	Source_journal	Common_name	Species	Ruminant_Nonruminant	Foregut_Hindgut_Fermenter	Sorting_name	Sorting_no	Diet	Measurement	Details_1	Details_2	Details_3	Details_4	n	BodyMass_kg	DMI_g/d	DMI_kg/d	rDMI_g/MBW/d	Ash_przDM	OM_przDM	Prot_przDM	CrudeFib_przDM	NDF_przDM	ADF_przDM	ADL_przDM	GE_kJ/kgDM	OMI_g/d	NDFI_g/d	ADFI_g/d	GEI_kJ/d	rGEI_kJ/MBW	aD_DM	aD_OM	aD_N	aD_NDF	aD_ADF	aD_GE	dDMI_g/d	dOMI_g/d	dNDFI_g/d	dADFI_g/d	rdNDFI_g/MBW/d	DIE_kJ/d	rDEI_kJ/MBW/d	CH4_L/d	CH4_L/kgBM	CH4_g/d	CH4_kJ/d	CH4_przGEI
Archimede et al. (2014)	Anim Feed Sci Technol	Domestic sheep	Ovis aries	Ruminant	Foregut	Sheep	1	Grass hay and straw	SF6					8	40.1	774.4	0.7744	48.5967	7	93	5.6		75.7	41.7	6.1		720.192	586.221	322.925			62.8	64.7	46.2	69.3	68.4		486.323	465.964	406.251	220.881	25.4939			32.6816	0.815002	23.4	1293.05
Archimede et al. (2014)	Anim Feed Sci Technol	Domestic sheep	Ovis aries	Ruminant	Foregut	Sheep	1	Sugarcane	SF6	supplemented with urea				8	40.1	824.8	0.8248	51.7595	3.5	96.5	4.2		56.8	34.8	6.4		795.932	468.486	287.03			70.3	71.2	49.2	51	52.6		579.834	566.704	238.928	150.978	14.9937			27.514	0.686134	19.7	1088.6
Archimede et al. (2018)	J Cleaner Prod	Domestic sheep	Ovis aries	Ruminant	Foregut	Sheep	1	C3 grass high quality	SF6	Blackbelly	West Indies			4	50.307	1147	1.147	60.7214	12.2	87.8	13.4		58.6	41	5.9		1022	693	470.27			65.2	66.6		65.7	57.8		747.844	680.652	455.301	271.816	24.1033			17.3184	0.344255	12.4	685.208
Archimede et al. (2018)	J Cleaner Prod	Domestic sheep	Ovis aries	Ruminant	Foregut	Sheep	1	C4 grass high quality	SF7	Blackbelly	West Indies			4	46.3596	1057	1.057	59.4935	8.8	91.2	12		74.2	47	7.4		965	801	424			66.2	67		73.8	72.1		699.734	646.55	591.138	305.704	33.2724			27.095	0.584452	19.4	1072.02
Archimede et al. (2018)	J Cleaner Prod	Domestic sheep	Ovis aries	Ruminant	Foregut	Sheep	1	C3 grass high quality	SF6	Texel	France			4	56.8512	1643	1.643	79.3565	12.2	87.8	13.4		58.6	41	5.9		1459	915	673.63			62.2	64.6		60.7	58.6		1021.95	942.514	555.405	394.747	26.8259			37.9888	0.668215	27.2	1503.04
Archimede et al. (2018)	J Cleaner Prod	Domestic sheep	Ovis aries	Ruminant	Foregut	Sheep	1	C4 grass high quality	SF6	Texel	France			4	59.1667	994	0.994	46.5938	8.8	91.2	12		74.2	47	7.4		910	727	391			61.8	62.3		69.7	68.3		614.292	566.93	506.719	267.053	23.7525			27.3743	0.462664	19.6	1083.07
Archimede et al. (2018)	J Cleaner Prod	Domestic sheep	Ovis aries	Ruminant	Foregut	Sheep	1	C4 grass low quality	SF6	Texel	France			4	60.3101	778	0.778	35.949	7.1	92.9	6.9		74.2	54	7.4		724	570	307			47.6	49.6		51.1	45.8		370.328	359.104	291.27	140.606	13.4587			14.6648	0.243157	10.5	580.217
Archimede et al. (2018)	J Cleaner Prod	Domestic sheep	Ovis aries	Ruminant	Foregut	Sheep	1	C4 grass low quality	SF9	Blackbelly	West Indies			4	46.8449	876	0.876	48.9223	7.1	92.9	6.9		74.2	54	7.4		811	668	348			55.5	56.6		61.7	58.5		486.18	459.026	412.156	203.58	23.0178			21.7877	0.465103	15.6	862.036
Archimede et al. (2018)	J Cleaner Prod	Domestic sheep	Ovis aries	Ruminant	Foregut	Sheep	1	C3 grass low quality	SF6	Blackbelly	West Indies			4	48.903	1159	1.159	62.6732	7.4	92.6	8.3		62.3	37	6.2		1068	758	428.83			57.6	58.5		57.5	55		667.584	624.78	435.85	235.856	23.5687			25.9777	0.531208	18.6	1027.81
Archimede et al. (2018)	J Cleaner Prod	Domestic sheep	Ovis aries	Ruminant	Foregut	Sheep	1	C4 grass low quality	SF6	Blackbelly	France			4	44.702	675	0.675	39.0444	7.1	92.9	6.9		74.2	54	7.4		629	496	269			51.4	52.8		54.3	50.4		346.95	332.112	269.328	135.576	15.5789			15.0838	0.33743	10.8	596.794
Archimede et al. (2018)	J Cleaner Prod	Domestic sheep	Ovis aries	Ruminant	Foregut	Sheep	1	C3 grass high quality	SF6	Texel	West Indies			4	38.5271	994	0.994	64.2779	12.2	87.8	13.4		58.6	41	5.9		909	612	407.54			63.7	65.2		64.2	56.2		633.178	592.668	392.904	229.037	25.4075			26.3966	0.685144	18.9	1044.39
Archimede et al. (2018)	J Cleaner Prod	Domestic sheep	Ovis aries	Ruminant	Foregut	Sheep	1	C3 grass high quality	SF6	Blackbelly	France			4	46.2385	1008	1.008	56.847	12.2	87.8	13.4		58.6	41	5.9		896	563	413.28			66.8	68.8		65.4	63.5		673.344	616.448	368.202	262.433	20.7651			32.6816	0.706804	23.4	1293.05
Archimede et al. (2018)	J Cleaner Prod	Domestic sheep	Ovis aries	Ruminant	Foregut	Sheep	1	C3 grass low quality	SF6	Texel	France			4	59.6958	1570	1.57	73.1041	7.4	92.6	8.3		62.3	37	6.2		1468	933	580.9			55.4	56.6		47.7	47.1		869.78	830.888	445.041	273.604	20.7225			34.3575	0.575544	24.6	1359.37
Archimede et al. (2018)	J Cleaner Prod	Domestic sheep	Ovis aries	Ruminant	Foregut	Sheep	1	C4 grass high quality	SF6	Blackbelly	France			4	48.8235	830	0.83	44.9372	8.8	91.2	12		74.2	47	7.4		760	605	323			62.5	62.9		69.7	68.5		518.75	478.04	421.685	221.255	22.8305			27.7933	0.56926	19.9	1099.65
Archimede et al. (2018)	J Cleaner Prod	Domestic sheep	Ovis aries	Ruminant	Foregut	Sheep	1	C4 grass high quality	SF8	Texel	West Indies			4	41.0811	608	0.608	37.469	8.8	91.2	12		74.2	47	7.4		555	462	242			66.6	67.4		74.5	72.5		404.928	374.07	344.19	175.45	21.2113			22.905	0.557557	16.4	906.243
Archimede et al. (2018)	J Cleaner Prod	Domestic sheep	Ovis aries	Ruminant	Foregut	Sheep	1	C3 grass low quality	SF6	Texel	West Indies			4	40.7306	892	0.892	55.3254	7.4	92.6	8.3		62.3	37	6.2		817	584	330.04			54.2	55.3		54.3	50.2		483.464	451.801	317.112	165.68	19.6685			22.067	0.54178	15.8	873.088
Archimede et al. (2018)	J Cleaner Prod	Domestic sheep	Ovis aries	Ruminant	Foregut	Sheep	1	C3 grass low quality	SF6	Blackbelly	France			4	46.0317	1160	1.16	65.6394	7.4	92.6	8.3		62.3	37	6.2		1089	691	429.2			56.4	57.4		48.4	47.5		654.24	625.086	334.444	203.87	18.9248			30.3073	0.658399	21.7	1199.11
Archimede et al. (2018)	J Cleaner Prod	Domestic sheep	Ovis aries	Ruminant	Foregut	Sheep	1	C4 grass low quality	SF10	Texel	West Indies			4	40.5072	559	0.559	34.8147	7.1	92.9	6.9		74.2	54	7.4		517	435	222			60.4	62.1		67.2	62.7		337.636	321.057	292.32	139.194	18.2058			21.0894	0.520632	15.1	834.407
Barnett et al. (2012)	Anim Prod Sci	Domestic sheep	Ovis aries	Ruminant	Foregut	Sheep	1	lucerne:oaten chaff 1:1	Respiration chamber	Period 2 control				5	40	826	0.826	51.932														58.9						486.514							25.3799	0.634497	18.172	1004.16
Barnett et al. (2012)	Anim Prod Sci	Domestic sheep	Ovis aries	Ruminant	Foregut	Sheep	1	lucerne:oaten chaff 1:1	Respiration chamber	Period 1 control				5	40	854	0.854	53.6924														61.2						522.648							24.4511	0.611278	17.507	967.415
Barnett et al. (2015)	J Anim Physiol Anim Nutr	Domestic sheep	Ovis aries	Ruminant	Foregut	Sheep	1	lucerne:oaten chaff 1:1	Respiration chamber	Cold				6	46.1	1138	1.138	64.323														60.8						691.904							28.1321	0.610241	20.1426	1113.05
Barnett et al. (2015)	J Anim Physiol Anim Nutr	Domestic sheep	Ovis aries	Ruminant	Foregut	Sheep	1	lucerne:oaten chaff 1:1	Respiration chamber	Warm				6	44.9	1100	1.1	63.4173														61.8						679.8							29.6508	0.660375	21.23	1173.14
Carulla et al. (2005)	Aust J Agric Res	Domestic sheep	Ovis aries	Ruminant	Foregut	Sheep	1	Mixed roughage	Respiration chamber	No tannin				18	33.7	960.902	0.960902	68.7	12.0815	87.9185	23.8719		44.1048	27.9476		19010.2	844.811	423.804	268.549	18266.9	1306		73.9	72.9	76.6	74.7	70.3675		624.315	324.634	200.606	23.2098	12854	919	25.1	0.744807	19.1011	993.088	5.44
Franz et al. (2010)	Evol Ecol Res	Domestic sheep	Ovis aries	Ruminant	Foregut	Sheep	1	Gras hay	Respiration chamber	sheep 3				1	98.677	1344.56	1.34456	42.9455	19.72	80.28	5.75		58.19	32.59	4.58	15937.2	1079.41	782.398	438.191	21428.5	684.43	46.2584			41.287	38.7591	47.3998	621.971		323.028	169.839	10.3176	10157.1	324.419	29.09	0.2948	20.8284	1150.22	5.36771
Franz et al. (2010)	Evol Ecol Res	Domestic sheep	Ovis aries	Ruminant	Foregut	Sheep	1	Gras hay	Respiration chamber	sheep 1				1	92.657	1357.75	1.35775	45.4634	19.72	80.28	5.75		58.19	32.59	4.58	15937.2	1090	790.075	442.491	21638.7	724.558	47.0816			52.1693	49.8153	53.8127	639.251		412.177	220.428	13.8015	11644.4	389.904	33.72	0.363923	24.1435	1333.29	6.16158
Franz et al. (2010)	Evol Ecol Res	Domestic sheep	Ovis aries	Ruminant	Foregut	Sheep	1	Gras hay	Respiration chamber	sheep 2				1	90.604	815.981	0.815981	27.7856	19.72	80.28	5.75		58.19	32.59	4.58	15937.2	655.07	474.819	265.928	13004.4	442.824	50.5996			58.4004	54.4456	53.7705	412.883		277.297	144.786	9.44244	6992.55	238.109	28.09	0.31003	20.1124	1110.68	8.54076
Goopy et al. (2011)	Anim Feed Sci Technol	Domestic sheep	Ovis aries	Ruminant	Foregut	Sheep	1	Lucerne chaff	Respiration chamber					1	46	1127	1.127	63.8051			22.3																								24.4693	0.531941	17.52	968.133
Goopy et al. (2011)	Anim Feed Sci Technol	Domestic sheep	Ovis aries	Ruminant	Foregut	Sheep	1	Lucerne chaff	Respiration chamber					1	46	1186	1.186	67.1454			22.3																								24.8045	0.539228	17.76	981.395
Goopy et al. (2011)	Anim Feed Sci Technol	Domestic sheep	Ovis aries	Ruminant	Foregut	Sheep	1	Lucerne chaff	Respiration chamber					1	46	1216	1.216	68.8439			22.3																								25.1397	0.546514	18	994.657
Goopy et al. (2011)	Anim Feed Sci Technol	Domestic sheep	Ovis aries	Ruminant	Foregut	Sheep	1	Lucerne chaff	Respiration chamber					1	46	1106	1.106	62.6162			22.3																								26.8156	0.582949	19.2	1060.97
Goopy et al. (2011)	Anim Feed Sci Technol	Domestic sheep	Ovis aries	Ruminant	Foregut	Sheep	1	Lucerne chaff	Respiration chamber					1	46	1316	1.316	74.5054			22.3																								28.1564	0.612096	20.16	1114.02
Goopy et al. (2011)	Anim Feed Sci Technol	Domestic sheep	Ovis aries	Ruminant	Foregut	Sheep	1	Lucerne chaff	Respiration chamber					1	46	1344	1.344	76.0906			22.3																								30.838	0.670391	22.08	1220.11
Goopy et al. (2011)	Anim Feed Sci Technol	Domestic sheep	Ovis aries	Ruminant	Foregut	Sheep	1	Lucerne chaff	Respiration chamber					1	46	1328	1.328	75.1847			22.3																								31.1732	0.677678	22.32	1233.38
Goopy et al. (2011)	Anim Feed Sci Technol	Domestic sheep	Ovis aries	Ruminant	Foregut	Sheep	1	Lucerne chaff	Respiration chamber					1	46	1263	1.263	71.5048			22.3																								32.1788	0.699538	23.04	1273.16
Goopy et al. (2011)	Anim Feed Sci Technol	Domestic sheep	Ovis aries	Ruminant	Foregut	Sheep	1	Lucerne chaff	Respiration chamber					1	46	1344	1.344	76.0906			22.3																								32.1788	0.699538	23.04	1273.16
Goopy et al. (2011)	Anim Feed Sci Technol	Domestic sheep	Ovis aries	Ruminant	Foregut	Sheep	1	Lucerne chaff	Respiration chamber					1	46	1330	1.33	75.298			22.3																								32.514	0.706825	23.28	1286.42
Goopy et al. (2011)	Anim Feed Sci Technol	Domestic sheep	Ovis aries	Ruminant	Foregut	Sheep	1	Lucerne chaff	Respiration chamber					1	46	948	0.948	53.671			22.3																								34.1899	0.74326	24.48	1352.73
Goopy et al. (2011)	Anim Feed Sci Technol	Domestic sheep	Ovis aries	Ruminant	Foregut	Sheep	1	Lucerne chaff	Respiration chamber					1	46	1334	1.334	75.5244			22.3																								37.5419	0.816128	26.88	1485.36
Goopy et al. (2011)	Anim Feed Sci Technol	Domestic sheep	Ovis aries	Ruminant	Foregut	Sheep	1	Lucerne chaff	Respiration chamber					1	46	1344	1.344	76.0906			22.3																								40.5587	0.88171	29.04	1604.71
Goopy et al. (2014)	Br J Nutr	Domestic sheep	Ovis aries	Ruminant	Foregut	Sheep	1	lucerne:oaten chaff 1:1	Respiration chamber	Low				10	58.4	988	0.988	46.7678														64.8						640.224							28.7017	0.491467	21.842	1135.59
Goopy et al. (2014)	Br J Nutr	Domestic sheep	Ovis aries	Ruminant	Foregut	Sheep	1	lucerne:oaten chaff 1:1	Respiration chamber	High				10	61.4	1026	1.026	46.7758														66.4						681.264							33.6746	0.548446	25.6264	1332.34
Hammond et al. (2011)	Anim Feed Sci Technol	Domestic sheep	Ovis aries	Ruminant	Foregut	Sheep	1	Ryegrass	Respiration chamber	Exp 2 - 0.8				8	45.7	480	0.48	27.3089	9.7	90.3	12.5		41.5	22		18700	433.44	199.2	105.6	8976	510.676														17.0391	0.372847	12.2	674.157	7.51066
Hammond et al. (2011)	Anim Feed Sci Technol	Domestic sheep	Ovis aries	Ruminant	Foregut	Sheep	1	White clover	Respiration chamber	Exp 2 - 0.8				8	45.7	470	0.47	26.74	8.9	91.1	21.4		26.9	18.3		19000	428.17	126.43	86.01	8930	508.059														17.5978	0.385071	12.6	696.26	7.79687
Hammond et al. (2011)	Anim Feed Sci Technol	Domestic sheep	Ovis aries	Ruminant	Foregut	Sheep	1	White clover	Respiration chamber	Exp 1				8	45.3	930	0.93	53.261	9.5	90.5	25.5		27.6	18.3		18400	841.65	256.68	170.19	17112	980.002														25.6983	0.567292	18.4	1016.76	5.9418
Hammond et al. (2011)	Anim Feed Sci Technol	Domestic sheep	Ovis aries	Ruminant	Foregut	Sheep	1	Ryegrass	Respiration chamber	Exp 1				8	45.3	1100	1.1	62.9969	13.6	86.4	19.2		44.4	23		17600	950.4	488.4	253	19360	1108.75														34.2179	0.755362	24.5	1353.84	6.99297
Hammond et al. (2011)	Anim Feed Sci Technol	Domestic sheep	Ovis aries	Ruminant	Foregut	Sheep	1	Ryegrass	Respiration chamber	Exp 2 - 2.0				8	45.7	1190	1.19	67.7033	9.7	90.3	12.5		41.5	22		18700	1074.57	493.85	261.8	22253	1266.05														36.1732	0.791536	25.9	1431.2	6.4315
Hammond et al. (2011)	Anim Feed Sci Technol	Domestic sheep	Ovis aries	Ruminant	Foregut	Sheep	1	White clover	Respiration chamber	Exp 2 - 2.0				8	45.7	1160	1.16	65.9965	8.9	91.1	21.4		26.9	18.3		19000	1056.76	312.04	212.28	22040	1253.93														37.8492	0.828209	27.1	1497.51	6.79452
Hammond et al. (2013)	Anim Feed Sci Technol	Domestic sheep	Ovis aries	Ruminant	Foregut	Sheep	1	Ryegrass	Respiration chamber	Exp4 - 2.5				6	54.4	1510	1.51	75.3838	11.2	88.8	10.2		55.4	28.3	3.26	18600	1340.88	836.54	427.33	28086	1402.14	64.8						978.48							44.5531	0.81899	31.9	1762.75	6.27627
Hammond et al. (2013)	Anim Feed Sci Technol	Domestic sheep	Ovis aries	Ruminant	Foregut	Sheep	1	Ryegrass	Respiration chamber	Exp4 - 2.0				6	54.4	1260	1.26	62.903	11.2	88.8	10.2		55.4	28.3	3.26	18600	1118.88	698.04	356.58	23436	1170	62.5						787.5							37.8492	0.695757	27.1	1497.51	6.38979
Hammond et al. (2013)	Anim Feed Sci Technol	Domestic sheep	Ovis aries	Ruminant	Foregut	Sheep	1	Ryegrass	Respiration chamber	Exp4 - 1.6				6	54.4	1020	1.02	50.9215	11.2	88.8	10.2		55.4	28.3	3.26	18600	905.76	565.08	288.66	18972	947.139	64.1						653.82							32.4022	0.595629	23.2	1282	6.75734
Hammond et al. (2013)	Anim Feed Sci Technol	Domestic sheep	Ovis aries	Ruminant	Foregut	Sheep	1	Ryegrass	Respiration chamber	Exp4 - 1.2				6	54.4	760	0.76	37.9415	11.2	88.8	10.2		55.4	28.3	3.26	18600	674.88	421.04	215.08	14136	705.712	63.4						481.84							27.2346	0.500637	19.5	1077.55	7.6227
Hammond et al. (2013)	Anim Feed Sci Technol	Domestic sheep	Ovis aries	Ruminant	Foregut	Sheep	1	Ryegrass	Respiration chamber	Exp4 - 0.8				6	54.4	490	0.49	24.4623	11.2	88.8	10.2		55.4	28.3	3.26	18600	435.12	271.46	138.67	9114	454.998	62.5						306.25							18.2961	0.336325	13.1	723.89	7.94261
Hammond et al. (2013)	Anim Feed Sci Technol	Domestic sheep	Ovis aries	Ruminant	Foregut	Sheep	1	Ryegrass	Respiration chamber	Exp2 - 0.8				8	47.1	480	0.48	26.6978	9.9	90.1	12.8		42.5	22.6	1.89	18000	432.48	204	108.48	8640	480.56														17.0391	0.361764	12.2	674.157	7.80274
Hammond et al. (2013)	Anim Feed Sci Technol	Domestic sheep	Ovis aries	Ruminant	Foregut	Sheep	1	White clover	Respiration chamber	Exp2 - 0.8				8	47.1	470	0.47	26.1416	9.2	90.8	22.2		28	19	8.95	19000	426.76	131.6	89.3	8930	496.69														17.5978	0.373626	12.6	696.26	7.79687
Hammond et al. (2013)	Anim Feed Sci Technol	Domestic sheep	Ovis aries	Ruminant	Foregut	Sheep	1	White clover	Respiration chamber	Exp1				8	45.3	940	0.94	53.8337	9.9	90.1	26.2		28.6	19	8.86	19000	846.94	268.84	178.6	17860	1022.84														25.6983	0.567292	18.4	1016.76	5.69295
Hammond et al. (2013)	Anim Feed Sci Technol	Domestic sheep	Ovis aries	Ruminant	Foregut	Sheep	1	Ryegrass	Respiration chamber	Exp1				8	45.3	1120	1.12	64.1423	14	86	19.6		45.5	23.5	3.81	17600	963.2	509.6	263.2	19712	1128.9														34.2179	0.755362	24.5	1353.84	6.8681
Hammond et al. (2013)	Anim Feed Sci Technol	Domestic sheep	Ovis aries	Ruminant	Foregut	Sheep	1	Ryegrass	Respiration chamber	Exp3 - 1.6				4	51	930	0.93	48.731	10.2	89.8	11.7		46.6	23.7	1.81	17800	835.14	433.38	220.41	16554	867.412														34.2179	0.670939	24.5	1353.84	8.17832
Hammond et al. (2013)	Anim Feed Sci Technol	Domestic sheep	Ovis aries	Ruminant	Foregut	Sheep	1	White clover	Respiration chamber	Exp3 - 1.6				4	51	910	0.91	47.683	9.7	90.3	22		29.6	20.3	6.86	18900	821.73	269.36	184.73	17199	901.209														35.8939	0.703801	25.7	1420.15	8.25716
Hammond et al. (2013)	Anim Feed Sci Technol	Domestic sheep	Ovis aries	Ruminant	Foregut	Sheep	1	Ryegrass	Respiration chamber	Exp2 - 2.0				8	47.1	1190	1.19	66.1883	9.9	90.1	12.8		42.5	22.6	1.89	18000	1072.19	505.75	268.94	21420	1191.39														36.1732	0.768008	25.9	1431.2	6.68161
Hammond et al. (2013)	Anim Feed Sci Technol	Domestic sheep	Ovis aries	Ruminant	Foregut	Sheep	1	White clover	Respiration chamber	Exp2 - 2.0				8	47.1	1160	1.16	64.5197	9.2	90.8	22.2		28	19	8.95	19000	1053.28	324.8	220.4	22040	1225.87														37.8492	0.803592	27.1	1497.51	6.79452
Hammond et al. (2014)	Anim Feed Sci Technol	Domestic sheep	Ovis aries	Ruminant	Foregut	Sheep	1	Ryegrass	Respiration chamber	Exp 2 - 1.51				6	51.4	1340	1.34	69.8043	11.2	88.8	10.2		55.4	28.3		18600	1189.92	742.36	379.22	24924	1298.36	65.1						872.34							44.5531	0.866791	31.9	1762.75	7.07252
Hammond et al. (2014)	Anim Feed Sci Technol	Domestic sheep	Ovis aries	Ruminant	Foregut	Sheep	1	Ryegrass	Respiration chamber	Exp 1				4	51	1120	1.12	58.6868	10.2	89.8	11.7		46.6	23.7		17800	1005.76	521.92	265.44	19936	1044.62	72.7						814.24							34.2179	0.670939	24.5	1353.84	6.79093
Hammond et al. (2014)	Anim Feed Sci Technol	Domestic sheep	Ovis aries	Ruminant	Foregut	Sheep	1	Ryegrass	Respiration chamber	Exp 2 - 1.26				6	51.4	1070	1.07	55.7393	11.2	88.8	10.2		55.4	28.3		18600	950.16	592.78	302.81	19902	1036.75	63.7						681.59							37.8492	0.736365	27.1	1497.51	7.52443
Hammond et al. (2014)	Anim Feed Sci Technol	Domestic sheep	Ovis aries	Ruminant	Foregut	Sheep	1	White clover	Respiration chamber	Exp 1				4	51	1140	1.14	59.7348	9.7	90.3	22		29.6	20.3		18900	1029.42	337.44	231.42	21546	1128.99	72.5						826.5							35.8939	0.703801	25.7	1420.15	6.59125
Hammond et al. (2014)	Anim Feed Sci Technol	Domestic sheep	Ovis aries	Ruminant	Foregut	Sheep	1	Ryegrass	Respiration chamber	Exp 2 - 1.02				6	51.4	920	0.92	47.9254	11.2	88.8	10.2		55.4	28.3		18600	816.96	509.68	260.36	17112	891.412	64.1						589.72							32.4022	0.630394	23.2	1282	7.49184
Hammond et al. (2014)	Anim Feed Sci Technol	Domestic sheep	Ovis aries	Ruminant	Foregut	Sheep	1	Ryegrass	Respiration chamber	Exp 2 - 0.76				6	51.4	720	0.72	37.5068	11.2	88.8	10.2		55.4	28.3		18600	639.36	398.88	203.76	13392	697.627	62.5						450							27.2346	0.529857	19.5	1077.55	8.04619
Hammond et al. (2014)	Anim Feed Sci Technol	Domestic sheep	Ovis aries	Ruminant	Foregut	Sheep	1	Ryegrass	Respiration chamber	Exp 2 - 0.50				6	51.4	490	0.49	25.5255	11.2	88.8	10.2		55.4	28.3		18600	435.12	271.46	138.67	9114	474.774	62.2						304.78							18.2961	0.355955	13.1	723.89	7.94261
Jonker et al. (2014)	Proc N Z Soc Anim Prod	Domestic sheep	Ovis aries	Ruminant	Foregut	Sheep	1	Ryegrass	Respiration chamber	TRG	x1.1			8	33.3	570	0.57	41.1189	8.7	91.3	16.9		45.1				520.41	257.07																	16.8994	0.507491	12.1	668.631
Jonker et al. (2014)	Proc N Z Soc Anim Prod	Domestic sheep	Ovis aries	Ruminant	Foregut	Sheep	1	Ryegrass	Respiration chamber	HSG	x1.1			8	33.3	720	0.72	51.9397	7.5	92.5	13.9		43				666	309.6																	19.6927	0.591373	14.1	779.148
Jonker et al. (2014)	Proc N Z Soc Anim Prod	Domestic sheep	Ovis aries	Ruminant	Foregut	Sheep	1	Ryegrass	Respiration chamber	CRG	x1.1			8	33.3	720	0.72	51.9397	7.9	92.1	13.9		46.8				663.12	336.96																	22.2067	0.666868	15.9	878.614
Jonker et al. (2014)	Proc N Z Soc Anim Prod	Domestic sheep	Ovis aries	Ruminant	Foregut	Sheep	1	Ryegrass	Respiration chamber	HSG	x1.8			8	33.3	980	0.98	70.6957	7.5	92.5	13.9		43				906.5	421.4																	24.0223	0.721392	17.2	950.45
Jonker et al. (2014)	Proc N Z Soc Anim Prod	Domestic sheep	Ovis aries	Ruminant	Foregut	Sheep	1	Ryegrass	Respiration chamber	TRG	x1.8			8	33.3	900	0.9	64.9246	8.7	91.3	16.9		45.1				821.7	405.9																	24.3017	0.72978	17.4	961.502
Jonker et al. (2014)	Proc N Z Soc Anim Prod	Domestic sheep	Ovis aries	Ruminant	Foregut	Sheep	1	Ryegrass	Respiration chamber	CRG	x1.8			8	33.3	930	0.93	67.0888	7.9	92.1	13.9		46.8				856.53	435.24																	24.3017	0.72978	17.4	961.502
Jonker et al. (2016)	J Anim Sci	Domestic sheep	Ovis aries	Ruminant	Foregut	Sheep	1	Alfalfa silage	Respiration chamber					8	59	1110	1.11	52.1416	9.2	90.8	17.7		43.9	34.9	8.4	19000	1007.88	487.29	387.39	21090	990.69														28.2123	0.478174	20.2	1116.23	5.4
Jonker et al. (2017)	J Anim Sci	Domestic sheep	Ovis aries	Ruminant	Foregut	Sheep	1	Pasture	SF6	Exp 1 - high				24	77	1930	1.93	74.2488	9.3	90.7	19.5		44.4	22			1750.51	856.92	424.6			69.9482						1350							43.9944	0.571356	31.5	1740.65
Jonker et al. (2017)	J Anim Sci	Domestic sheep	Ovis aries	Ruminant	Foregut	Sheep	1	Pasture	SF6	Exp 1 - low				18	75.2	2080	2.08	81.4517	9.3	90.7	19.5		44.4	22			1886.56	923.52	457.6			71.1538						1480							42.1788	0.560888	30.2	1668.81
Jonker et al. (2017)	J Anim Sci	Domestic sheep	Ovis aries	Ruminant	Foregut	Sheep	1	Pasture	SF6	Exp 2 - high				50	66.8	1710	1.71	73.1836	12.05	87.95	26.25		35.9	18.6	1.6		1503.94	613.89	318.06			74.269						1270							51.676	0.773592	37	2044.57
Jonker et al. (2017)	J Anim Sci	Domestic sheep	Ovis aries	Ruminant	Foregut	Sheep	1	Pasture	SF6	Exp 2 - low				48	67.3	1870	1.87	79.5848	12.05	87.95	26.25		35.9	18.6	1.6		1644.66	671.33	347.82			73.7968						1380							48.1844	0.715964	34.5	1906.43
Klita et al. (1996)	J Anim Sci	Domestic sheep	Ovis aries	Ruminant	Foregut	Sheep	1	Control grass hay	Respiration hood	No saponin				4	59.5	1185	1.185	55.3134	9.62025	90.3797	14.3987		56.3713	33.9241		18549.1	1071	668	402	21980.7	1026.02		73.2	74.2	70.4	68.5			783.972	470.272	275.37	21.9514			28.7	0.482353	21.8407	1135.52	5.166
Knight et al. (2008)	Austr J Exp Agric	Domestic sheep	Ovis aries	Ruminant	Foregut	Sheep	1	Fresh pasture	SF6	Nov	Lambs			14	29.5	510	0.51	40.2906	7.6	92.4	12.7		52	31.6			471.24	265.2	161.16																14.9441	0.506581	10.7	591.269
Knight et al. (2008)	Austr J Exp Agric	Domestic sheep	Ovis aries	Ruminant	Foregut	Sheep	1	Fresh pasture	SF6	Dec	Lambs			14	32.6	520	0.52	38.1145	9.9	90.1	19.2		51.3	31.6			468.52	266.76	164.32																17.0391	0.522672	12.2	674.157
Knight et al. (2008)	Austr J Exp Agric	Domestic sheep	Ovis aries	Ruminant	Foregut	Sheep	1	Fresh pasture	SF6	Apr	Lambs			14	41.7	780	0.78	47.5327	11.6	88.4	24.7		46.4	23.6			689.52	361.92	184.08																19.2737	0.4622	13.8	762.571
Knight et al. (2008)	Austr J Exp Agric	Domestic sheep	Ovis aries	Ruminant	Foregut	Sheep	1	Fresh pasture	SF6	Feb	Lambs			14	36.6	690	0.69	46.3701	10.1	89.9	13.1		55.3	31.4			620.31	381.57	216.66																24.4413	0.667796	17.5	967.028
Knight et al. (2008)	Austr J Exp Agric	Domestic sheep	Ovis aries	Ruminant	Foregut	Sheep	1	Fresh pasture	SF6	Dec	Ewes			14	58.2	860	0.86	40.8137	9.9	90.1	19.2		51.3	31.6			774.86	441.18	271.76																30.0279	0.515944	21.5	1188.06
Knight et al. (2008)	Austr J Exp Agric	Domestic sheep	Ovis aries	Ruminant	Foregut	Sheep	1	Fresh pasture	SF6	Apr	Ewes			14	60.6	1010	1.01	46.5015	11.6	88.4	24.7		46.4	23.6			892.84	468.64	238.36																30.3073	0.50012	21.7	1199.11
Knight et al. (2008)	Austr J Exp Agric	Domestic sheep	Ovis aries	Ruminant	Foregut	Sheep	1	Fresh pasture	SF6	Nov	Ewes			14	53.9	980	0.98	49.2645	7.6	92.4	12.7		52	31.6			905.52	509.6	309.68																30.5866	0.567469	21.9	1210.17
Knight et al. (2008)	Austr J Exp Agric	Domestic sheep	Ovis aries	Ruminant	Foregut	Sheep	1	Fresh pasture	SF6	Feb	Ewes			14	57.6	890	0.89	42.567	10.1	89.9	13.1		55.3	31.4			800.11	492.17	279.46																31.4246	0.545566	22.5	1243.32
Lassey et al. (1997)	Atmosph Environ	Domestic sheep	Ovis aries	Ruminant	Foregut	Sheep	1	Pasture	SF6	S1				16	37	1214	1.214	80.9221	9.9	90.1	24.7		43.5	24.4		18400	1093.81	528.09	296.216	22337.6	1488.97														24.7207	0.668126	17.7	978.08	4.5
Lassey et al. (1997)	Atmosph Environ	Domestic sheep	Ovis aries	Ruminant	Foregut	Sheep	1	Pasture	SF6	S2				18	37	1264	1.264	84.255	10	90	23.6		44.9	25.2		18400	1137.6	567.536	318.528	23257.6	1550.29														26.5363	0.717198	19	1049.92	4.58
Lassey et al. (1997)	Atmosph Environ	Domestic sheep	Ovis aries	Ruminant	Foregut	Sheep	1	Pasture	SF6	S3				18	37	1334	1.334	88.921	11.3	88.7	26.5		44.9	24		18400	1183.26	598.966	320.16	24545.6	1636.15														28.0726	0.75872	20.1	1110.7	4.62
Macrae et al. (1985)	Br J Nutr	Domestic sheep	Ovis aries	Ruminant	Foregut	Sheep	1	Autumn grass	Respiration chamber					4	70.5	712	0.712	29.2643			14.5		55	34		18200		391.6	242.08	12985	533.704						66.7						8661	355.98	27.7516	0.39364	21.119	1098	8.45591
Macrae et al. (1985)	Br J Nutr	Domestic sheep	Ovis aries	Ruminant	Foregut	Sheep	1	Spring grass	Respiration chamber					4	70.5	702	0.702	28.8533			13		48	26		18300		336.96	182.52	12778	525.196						77.7821						9939	408.508	26.6648	0.378224	20.2919	1055	8.25638
Macrae et al. (1985)	Br J Nutr	Domestic sheep	Ovis aries	Ruminant	Foregut	Sheep	1	Autumn grass	Respiration chamber					4	70.5	1311	1.311	53.8841			14.5		55	34		18200		721.05	445.74	23895	982.121						64.5909						15434	634.361	41.6022	0.590101	31.6592	1646	6.88847
Macrae et al. (1985)	Br J Nutr	Domestic sheep	Ovis aries	Ruminant	Foregut	Sheep	1	Spring grass	Respiration chamber					4	70.5	1260	1.26	51.7879			13		48	26		18300		604.8	327.6	22946	943.116						74.7974						17163	705.426	40.389	0.572893	30.736	1598	6.96418
Margan et al. (1988)	Austr J Exp Agric	Domestic sheep	Ovis aries	Ruminant	Foregut	Sheep	1	Clover ad lib	Respiration chamber					4	58	1836	1.836	87.3578								18518.5				34000	1617.74	66					64	1211.76					21690	1032.02	50.8021	0.875899	38.6604	2010	5.91176
Margan et al. (1988)	Austr J Exp Agric	Domestic sheep	Ovis aries	Ruminant	Foregut	Sheep	1	Ryegrass ad lib	Respiration chamber					4	58	1600	1.6	76.1288								17968.8				28750	1367.94	55					54	880					15400	732.74	43.7252	0.753883	33.2749	1730	6.01739
Margan et al. (1988)	Austr J Exp Agric	Domestic sheep	Ovis aries	Ruminant	Foregut	Sheep	1	Setaria ad lib	Respiration chamber					4	59	1473	1.473	69.1933								18038				26570	1248.11	58					55	854.34					14540	683.007	49.2857	0.83535	37.5064	1950	7.3391
Margan et al. (1988)	Austr J Exp Agric	Domestic sheep	Ovis aries	Ruminant	Foregut	Sheep	1	Pangola ad lib	Respiration chamber					4	60	1551	1.551	71.9446								18156				28160	1306.23	58					54	899.58					15330	711.097	53.5824	0.893039	40.7762	2120	7.52841
Mbanzamihigo et al. (2002)	Can J Anim Sci	Domestic sheep	Ovis aries	Ruminant	Foregut	Sheep	1	Ryegrass clover pasture	C2H6Tracer	Late N0				4	81.4	1060	1.06	39.1145	11	89	22.5	24.5	56.7	26.6			943.4	601.02	281.96			75.7														0			5.7
Mbanzamihigo et al. (2002)	Can J Anim Sci	Domestic sheep	Ovis aries	Ruminant	Foregut	Sheep	1	Ryegrass clover pasture	C2H6Tracer	Early N150				4	81.4	1090	1.09	40.2215	9	91	14.3	26.7	49	27			991.9	534.1	294.3			77.8														0			5.3
Mbanzamihigo et al. (2002)	Can J Anim Sci	Domestic sheep	Ovis aries	Ruminant	Foregut	Sheep	1	Ryegrass clover pasture	C2H6Tracer	Early N0				4	81.4	1130	1.13	41.6975	9.1	90.9	13.9	27	48	27.4			1027.17	542.4	309.62			76.2														0			5.5
Mbanzamihigo et al. (2002)	Can J Anim Sci	Domestic sheep	Ovis aries	Ruminant	Foregut	Sheep	1	Ryegrass clover pasture	C2H6Tracer	Late N150				4	81.4	1050	1.05	38.7455	10.6	89.4	22.7	24.9	58.1	28.2			938.7	610.05	296.1			73.2														0			5.6
Moorby et al. (2015)	Sci Rep	Domestic sheep	Ovis aries	Ruminant	Foregut	Sheep	1	Permanent pasture	Respiration chamber	Welsh Mountain				8	41.3	760	0.76	46.6499	10.6	89.4	31.7		50.7	24.5		19500	679.44	385.32	186.2	14820	909.674	79.4						603.44							15.0838	0.365225	10.8	596.794	4.1
Moorby et al. (2015)	Sci Rep	Domestic sheep	Ovis aries	Ruminant	Foregut	Sheep	1	Permanent pasture	Respiration chamber	Texel				8	67.6	1030	1.03	43.6895	10.6	89.4	31.7		50.7	24.5		19500	920.82	522.21	252.35	20085	851.946	75.5						777.65							20.9497	0.309907	15	828.881	4.2
Moorby et al. (2015)	Sci Rep	Domestic sheep	Ovis aries	Ruminant	Foregut	Sheep	1	Ryegrass	Respiration chamber	Texel				8	77.6	1550	1.55	59.2837	8.5	91.5	11		51.2	25		18500	1418.25	793.6	387.5	28675	1096.75	81.2						1258.6							36.8715	0.475148	26.4	1458.83	5.1
Moorby et al. (2015)	Sci Rep	Domestic sheep	Ovis aries	Ruminant	Foregut	Sheep	1	Permanent pasture	Respiration chamber	Welsh Mule				8	63.9	860	0.86	38.0516	10.6	89.4	31.7		50.7	24.5		19500	768.84	436.02	210.7	16770	742.006	76.3						656.18							19.9721	0.312552	14.3	790.2	4.8
Moorby et al. (2015)	Sci Rep	Domestic sheep	Ovis aries	Ruminant	Foregut	Sheep	1	Permanent pasture	Respiration chamber	Scottish Blackface				8	57.9	770	0.77	36.6844	10.6	89.4	31.7		50.7	24.5		19500	688.38	390.39	188.65	15015	715.346	80.3						618.31							19.5531	0.337704	14	773.622	5
Moorby et al. (2015)	Sci Rep	Domestic sheep	Ovis aries	Ruminant	Foregut	Sheep	1	Molinia	Respiration chamber	Welsh Mule				8	69	1030	1.03	43.023	2.6	97.4	12.8		74.5	37.5		20100	1003.22	767.35	386.25	20703	864.762	51						525.3							16.7598	0.242895	12	663.105	3.5
Moorby et al. (2015)	Sci Rep	Domestic sheep	Ovis aries	Ruminant	Foregut	Sheep	1	Molinia	Respiration chamber	Welsh Mountain				8	40	660	0.66	41.4953	2.6	97.4	12.8		74.5	37.5		20100	642.84	491.7	247.5	13266	834.056	57.7						380.82							12.4302	0.310754	8.9	491.803	3.9
Moorby et al. (2015)	Sci Rep	Domestic sheep	Ovis aries	Ruminant	Foregut	Sheep	1	Ryegrass	Respiration chamber	Welsh Mule				8	70.9	1300	1.3	53.2058	8.5	91.5	11		51.2	25		18500	1189.5	665.6	325	24050	984.307	80.6						1047.8							34.4972	0.486561	24.7	1364.89	5.7
Moorby et al. (2015)	Sci Rep	Domestic sheep	Ovis aries	Ruminant	Foregut	Sheep	1	Molinia	Respiration chamber	Scottish Blackface				8	53	890	0.89	45.3089	2.6	97.4	12.8		74.5	37.5		20100	866.86	663.05	333.75	17889	910.708	57.1						508.19							16.7598	0.316222	12	663.105	4
Moorby et al. (2015)	Sci Rep	Domestic sheep	Ovis aries	Ruminant	Foregut	Sheep	1	Ryegrass	Respiration chamber	Scottish Blackface				8	61.5	1020	1.02	46.4455	8.5	91.5	11		51.2	25		18500	933.3	522.24	255	18870	859.242	85.7						874.14							28.9106	0.470091	20.7	1143.86	6
Moorby et al. (2015)	Sci Rep	Domestic sheep	Ovis aries	Ruminant	Foregut	Sheep	1	Ryegrass	Respiration chamber	Welsh Mountain				8	45.8	1080	1.08	61.3444	8.5	91.5	11		51.2	25		18500	988.2	552.96	270	19980	1134.87	81.6						881.28							29.4693	0.643434	21.1	1165.96	5.9
Moorby et al. (2015)	Sci Rep	Domestic sheep	Ovis aries	Ruminant	Foregut	Sheep	1	Molinia	Respiration chamber	Texel				8	69	950	0.95	39.6814	2.6	97.4	12.8		74.5	37.5		20100	925.3	707.75	356.25	19095	797.596	50.4						478.8							20.8101	0.301595	14.9	823.355	4.7
Nielsen et al. (2014)	Arch Anim Nutr	Domestic sheep	Ovis aries	Ruminant	Foregut	Sheep	1	Grass hay and straw	Respiration chamber	both diets				6	74.95	1138.64	1.13864	44.7	5.5	94.5	10.65		69.3	39.95	5.85		1076.01	789.077	454.886	21541.1	845.647	50					48	569.32					10339.7	405.91	34.3	0.457638	26.1023	1357.09	6.3
Perez-Barberia (2017)	Sci Total Environ	Domestic sheep	Ovis aries	Ruminant	Foregut	Sheep	1	grass_heather	Respiration chamber					1	43	770	0.77	45.8553																											14.7067	0.342016	10.53	581.875
Perez-Barberia (2017)	Sci Total Environ	Domestic sheep	Ovis aries	Ruminant	Foregut	Sheep	1	grass_heather	Respiration chamber					1	44.5	760	0.76	44.1107																											15.1257	0.339903	10.83	598.452
Perez-Barberia (2017)	Sci Total Environ	Domestic sheep	Ovis aries	Ruminant	Foregut	Sheep	1	grass_heather	Respiration chamber					1	41.25	760	0.76	46.6923																											15.1955	0.368377	10.88	601.215
Perez-Barberia (2017)	Sci Total Environ	Domestic sheep	Ovis aries	Ruminant	Foregut	Sheep	1	grass_heather	Respiration chamber					1	40.75	760	0.76	47.1214																											15.5307	0.381122	11.12	614.477
Perez-Barberia (2017)	Sci Total Environ	Domestic sheep	Ovis aries	Ruminant	Foregut	Sheep	1	grass	Respiration chamber					1	60	410	0.41	19.0182																											16.2291	0.270484	11.62	642.107
Perez-Barberia (2017)	Sci Total Environ	Domestic sheep	Ovis aries	Ruminant	Foregut	Sheep	1	grass_heather	Respiration chamber					1	39.75	690	0.69	43.5859																											16.5503	0.416359	11.85	654.816
Perez-Barberia (2017)	Sci Total Environ	Domestic sheep	Ovis aries	Ruminant	Foregut	Sheep	1	grass_heather	Respiration chamber					1	40.25	690	0.69	43.1792																											17.1927	0.427149	12.31	680.235
Perez-Barberia (2017)	Sci Total Environ	Domestic sheep	Ovis aries	Ruminant	Foregut	Sheep	1	grass_heather	Respiration chamber					1	42.25	690	0.69	41.637																											17.6955	0.418829	12.67	700.128
Perez-Barberia (2017)	Sci Total Environ	Domestic sheep	Ovis aries	Ruminant	Foregut	Sheep	1	grass	Respiration chamber					1	60.75	530	0.53	24.3566																											18.1983	0.299561	13.03	720.021
Perez-Barberia (2017)	Sci Total Environ	Domestic sheep	Ovis aries	Ruminant	Foregut	Sheep	1	grass_heather	Respiration chamber					1	62.75	810	0.81	36.3308																											18.4777	0.294465	13.23	731.073
Perez-Barberia (2017)	Sci Total Environ	Domestic sheep	Ovis aries	Ruminant	Foregut	Sheep	1	grass_heather	Respiration chamber					1	41	690	0.69	42.5854																											18.8966	0.460894	13.53	747.651
Perez-Barberia (2017)	Sci Total Environ	Domestic sheep	Ovis aries	Ruminant	Foregut	Sheep	1	grass_heather	Respiration chamber					1	61.25	790	0.79	36.0826																											19.0782	0.311481	13.66	754.834
Perez-Barberia (2017)	Sci Total Environ	Domestic sheep	Ovis aries	Ruminant	Foregut	Sheep	1	grass_heather	Respiration chamber					1	61.5	860	0.86	39.1599																											19.3017	0.313848	13.82	763.676
Perez-Barberia (2017)	Sci Total Environ	Domestic sheep	Ovis aries	Ruminant	Foregut	Sheep	1	grass	Respiration chamber					1	56.25	610	0.61	29.6987																											21.3268	0.379143	15.27	843.801
Perez-Barberia (2017)	Sci Total Environ	Domestic sheep	Ovis aries	Ruminant	Foregut	Sheep	1	grass_heather	Respiration chamber					1	63	1360	1.36	60.8182																											22.7095	0.360468	16.26	898.507
Perez-Barberia (2017)	Sci Total Environ	Domestic sheep	Ovis aries	Ruminant	Foregut	Sheep	1	grass_heather	Respiration chamber					1	64.5	1070	1.07	47.0126																											22.7374	0.352518	16.28	899.612
Perez-Barberia (2017)	Sci Total Environ	Domestic sheep	Ovis aries	Ruminant	Foregut	Sheep	1	grass_heather	Respiration chamber					1	68	890	0.89	37.5845																											22.9749	0.337866	16.45	909.006
Perez-Barberia (2017)	Sci Total Environ	Domestic sheep	Ovis aries	Ruminant	Foregut	Sheep	1	grass_heather	Respiration chamber					1	66.5	1450	1.45	62.2661																											24.2039	0.363969	17.33	957.634
Perez-Barberia (2017)	Sci Total Environ	Domestic sheep	Ovis aries	Ruminant	Foregut	Sheep	1	grass_heather	Respiration chamber					1	61.75	1300	1.3	59.0154																											24.986	0.404632	17.89	988.579
Perez-Barberia (2017)	Sci Total Environ	Domestic sheep	Ovis aries	Ruminant	Foregut	Sheep	1	grass_heather	Respiration chamber					1	56.5	1410	1.41	68.42																											25.5726	0.452613	18.31	1011.79
Perez-Barberia (2017)	Sci Total Environ	Domestic sheep	Ovis aries	Ruminant	Foregut	Sheep	1	grass_heather	Respiration chamber					1	56	1320	1.32	64.4812																											28.1425	0.502544	20.15	1113.46
Perez-Barberia (2017)	Sci Total Environ	Domestic sheep	Ovis aries	Ruminant	Foregut	Sheep	1	grass_heather	Respiration chamber					1	49	1230	1.23	66.4138																											29.3855	0.599704	21.04	1162.64
Perez-Barberia (2017)	Sci Total Environ	Domestic sheep	Ovis aries	Ruminant	Foregut	Sheep	1	grass_heather	Respiration chamber					1	65.5	1320	1.32	57.3315																											30.852	0.471022	22.09	1220.67
Perez-Barberia (2017)	Sci Total Environ	Domestic sheep	Ovis aries	Ruminant	Foregut	Sheep	1	grass	Respiration chamber					1	57	680	0.68	32.7795
Pinares-Patino et al. (2003)	J Agric Sci 205-214	Domestic sheep	Ovis aries	Ruminant	Foregut	Sheep	1	Lucerne hay	SF6					10	46.85	1083	1.083	60.4778	9.4	90.6	18.875		42.3	35.9	7.3	18350	981.198	458.109	388.797	19873	1109.77	59.1	60.4				56.7	640.053	592.644				11268	629.239	26.26	0.560512	18.7	1000	5.2
Pinares-Patino et al. (2003)	J Agric Sci 215-226	Domestic sheep	Ovis aries	Ruminant	Foregut	Sheep	1	Lucerne hay	SF6					6	43.3	1249.1	1.2491	74	9.1	90.9	23.9375		38	31.3		18378.4	1135.43	474.658	390.969	22956.5	1360														26.257	0.606397	18.8	1038.86	4.52537
Pinares-Patino et al. (2003)	J Agric Sci 215-226	Domestic sheep	Ovis aries	Ruminant	Foregut	Sheep	1	Birdsfoot trefoil pasture	SF6					6	47.2	2303.18	2.30318	127.9	8.1	91.9	26.875		24.9	19.9		19781.1	2116.62	573.491	458.332	45559.3	2530														30.7263	0.65098	22	1215.69	2.66837
Pinares-Patino et al. (2003)	J Agric Sci 215-226	Domestic sheep	Ovis aries	Ruminant	Foregut	Sheep	1	Ryegrass clover pasture	SF6					6	46.4	1240.92	1.24092	69.8	10.2	89.8	23.75		36	24.2		18911.2	1114.35	446.731	300.303	23467.3	1320														43.4358	0.936115	31.1	1718.55	7.32317
Pinares-Patino et al. (2003)	J Agric Sci 227-233	Domestic sheep	Ovis aries	Ruminant	Foregut	Sheep	1	Ryegrass clover pasture	SF6	P1 low				4	45.5				10.8	89.2	24.2		36.5	20.6						59389.3	3390														32.1229	0.705998	23	1270.95	2.14003
Pinares-Patino et al. (2003)	J Agric Sci 227-233	Domestic sheep	Ovis aries	Ruminant	Foregut	Sheep	1	Ryegrass clover pasture	SF6	P4 low				4	55.7				11	89	29.3		39.7	21						48117.5	2360														38.1285	0.684533	27.3	1508.56	3.13516
Pinares-Patino et al. (2003)	J Agric Sci 227-233	Domestic sheep	Ovis aries	Ruminant	Foregut	Sheep	1	Ryegrass clover pasture	SF6	P3 high				4	50.7				10.7	89.3	22.5		37.5	21.6						40850.2	2150														43.7151	0.86223	31.3	1729.6	4.234
Pinares-Patino et al. (2003)	J Agric Sci 227-233	Domestic sheep	Ovis aries	Ruminant	Foregut	Sheep	1	Ryegrass clover pasture	SF6	P3 low				4	54.7				10.7	89.3	22.5		37.5	21.6						46060.2	2290														44.6927	0.817052	32	1768.28	3.83906
Pinares-Patino et al. (2003)	J Agric Sci 227-233	Domestic sheep	Ovis aries	Ruminant	Foregut	Sheep	1	Ryegrass clover pasture	SF6	P2 low				4	49.7				10.8	89.2	22.1		41.3	23.6						36500.8	1950														45.8101	0.921732	32.8	1812.49	4.96561
Pinares-Patino et al. (2003)	J Agric Sci 227-233	Domestic sheep	Ovis aries	Ruminant	Foregut	Sheep	1	Ryegrass clover pasture	SF6	P4 high				4	50.2				11	89	29.3		39.7	21						45074	2390														50.838	1.01271	36.4	2011.42	4.46248
Pinares-Patino et al. (2003)	J Agric Sci 227-233	Domestic sheep	Ovis aries	Ruminant	Foregut	Sheep	1	Ryegrass clover pasture	SF6	P2 high				4	46.6				10.8	89.2	22.1		41.3	23.6						32639.3	1830														52.095	1.11792	37.3	2061.15	6.31494
Pinares-Patino et al. (2003)	J Agric Sci 227-233	Domestic sheep	Ovis aries	Ruminant	Foregut	Sheep	1	Ryegrass clover pasture	SF6	P1 high				4	44				10.8	89.2	24.2		36.5	20.6						37755.6	2210														52.095	1.18398	37.3	2061.15	5.45919
Ritzman & Benedict (1938)	Monograph	Domestic sheep	Ovis aries	Ruminant	Foregut	Sheep	1	grass	Respiration chamber					1	58.7																														12.4302	0.211758	8.9	491.803
Ritzman & Benedict (1938)	Monograph	Domestic sheep	Ovis aries	Ruminant	Foregut	Sheep	1	grass	Respiration chamber					1	42.2																														14.5251	0.344198	10.4	574.691
Ritzman & Benedict (1938)	Monograph	Domestic sheep	Ovis aries	Ruminant	Foregut	Sheep	1	grass	Respiration chamber					1	40																														15.0838	0.377095	10.8	596.794
Ritzman & Benedict (1938)	Monograph	Domestic sheep	Ovis aries	Ruminant	Foregut	Sheep	1	grass	Respiration chamber					1	39.9																														21.5084	0.539057	15.4	850.985
Ritzman & Benedict (1938)	Monograph	Domestic sheep	Ovis aries	Ruminant	Foregut	Sheep	1	grass	Respiration chamber					1	44																														23.6034	0.53644	16.9	933.873
Ritzman & Benedict (1938)	Monograph	Domestic sheep	Ovis aries	Ruminant	Foregut	Sheep	1	grass	Respiration chamber					1	47.2																														27.514	0.582923	19.7	1088.6
Ritzman & Benedict (1938)	Monograph	Domestic sheep	Ovis aries	Ruminant	Foregut	Sheep	1	grass	Respiration chamber					1	58.1																														32.5419	0.560102	23.3	1287.53
Robinson et al. (2010)	Anim Prod Sci	Domestic sheep	Ovis aries	Ruminant	Foregut	Sheep	1	Lucerne chaff	Respiration chamber	0.80x				12	45.3616	624	0.624	35.7																											19.3	0.42547	14.6873	763.61
Robinson et al. (2010)	Anim Prod Sci	Domestic sheep	Ovis aries	Ruminant	Foregut	Sheep	1	Lucerne chaff	Respiration chamber	1.24x				12	44.5324	924	0.924	53.6																											24.3	0.54567	18.4923	961.436
Robinson et al. (2010)	Anim Prod Sci	Domestic sheep	Ovis aries	Ruminant	Foregut	Sheep	1	Lucerne chaff	Respiration chamber	1.60x				12	44.3949	1228	1.228	71.4																											29	0.653227	22.069	1147.39
Sun et al. (2012)	Anim Feed Sci Technol	Domestic sheep	Ovis aries	Ruminant	Foregut	Sheep	1	Ryegrass	Respiration chamber	2.2x				7	50	1053	1.053	56.0017	12.7	87.3	19.7		42.3	21.8			919.269	445.419	229.554			75.3	78.2	73	77.7	71.9		792.909	718.868	346.091	165.049	18.4061			31.7039	0.634078	22.7	1254.37
Sun et al. (2012)	Anim Feed Sci Technol	Domestic sheep	Ovis aries	Ruminant	Foregut	Sheep	1	Ryegrass	Respiration chamber	1.3x				7	50	685	0.685	36.4303	12.7	87.3	19.7		42.3	21.8			598.005	289.755	149.33			74.1	77.5	73.1	76	66.4		507.585	463.454	220.214	99.1551	11.7116			24.4413	0.488827	17.5	967.028
Sun et al. (2012)	Anim Feed Sci Technol	Domestic sheep	Ovis aries	Ruminant	Foregut	Sheep	1	Chicory	Respiration chamber	2.2x				7	50	1114	1.114	59.2458	19.6	80.4	11.4		23.9	18.8			895.656	266.246	209.432			76.1	82.9	56.8	58.8	63.5		847.754	742.499	156.553	132.989	8.32593			33.2402	0.664804	23.8	1315.16
Sun et al. (2012)	Anim Feed Sci Technol	Domestic sheep	Ovis aries	Ruminant	Foregut	Sheep	1	Chicory	Respiration chamber	1.3x				7	50	666	0.666	35.4199	19.6	80.4	11.4		23.9	18.8			535.464	159.174	125.208			76.5	83.3	56.8	60.7	65.6		509.49	446.042	96.6186	82.1364	5.13846			21.0894	0.421788	15.1	834.407
Swainson (2011)	PhD thesis	Domestic sheep	Ovis aries	Ruminant	Foregut	Sheep	1	Ensiled lucerne chaff	SF6	Winter				10	55	1000	1	49.514	10.1	89.9	21		45.2	34	8.2	19500	899	452	340	19500	965.523	64.4	64.4	65	51.4	51.8		644	578.956	232.328	176.12	11.5035			25.838	0.469782	18.5	1022.29	5.14
Swainson (2011)	PhD thesis	Domestic sheep	Ovis aries	Ruminant	Foregut	Sheep	1	Ensiled lucerne chaff	SF6	Summer				10	61	980	0.98	44.8982	9.9	90.1	21		45.1	33.7	8.3	19600	882.98	441.98	330.26	19100	875.056	69.4	70.2	62.8	51.5	51.6		680.12	619.852	227.62	170.414	10.4283			26.1173	0.428153	18.7	1033.34	5.47
Terada et al. (1987)	Book chapter	Domestic sheep	Ovis aries	Ruminant	Foregut	Sheep	1	hay	Respiration chamber						69.1	1320.02	1.32002	55.0773			13.3					18030				23800	993.044						60.8						14470.4	603.771	33.6861	0.487498	25.6351	1332.8	5.6
Tiemann et al. (2008)	Animal	Domestic sheep	Ovis aries	Ruminant	Foregut	Sheep	1	Grass hay	Respiration chamber					6	26.2	627.661	0.627661	54.2	7.9	92.1	6.1		63.8	37.6	4.59	16600	578.076	400.448	236.001	10480.3	905		61.4	43.8	58.8	59.9	53.3702		354.939	235.463	141.364	20.3328	5593.36	483	19.5	0.744275	14.8395	771.523	7.37
Ulyatt et al. (2002)	N Z J Agric Res 217-226	Domestic sheep	Ovis aries	Ruminant	Foregut	Sheep	1	Grass pasture	SF6	Mar				12	62	1350	1.35	61.0998	10.5	89.5	26.2		40.8	40.8			1208.25	550.8	550.8																37.7095	0.608218	27	1491.99	6.1
Ulyatt et al. (2002)	N Z J Agric Res 217-226	Domestic sheep	Ovis aries	Ruminant	Foregut	Sheep	1	Grass pasture	SF6	Jul				12	65.5	1887	1.887	81.9579	11.7	88.3	29.4		36.1	36.1			1666.22	681.207	681.207																38.9665	0.594908	27.9	1541.72	4.6
Ulyatt et al. (2002)	N Z J Agric Res 217-226	Domestic sheep	Ovis aries	Ruminant	Foregut	Sheep	1	Grass pasture	SF6	Sep				12	54.3	1512	1.512	75.5878	11.2	88.8	27.2		33	33			1342.66	498.96	498.96																42.7374	0.787061	30.6	1690.92	6.1
Ulyatt et al. (2002)	N Z J Agric Res 217-226	Domestic sheep	Ovis aries	Ruminant	Foregut	Sheep	1	Grass pasture	SF6	Nov				12	53.6	1462	1.462	73.803	9.2	90.8	19.3		43.5	43.5			1327.5	635.97	635.97																46.3687	0.865088	33.2	1834.59	6.9
Ulyatt et al. (2002)	N Z J Agric Res 227-234	Domestic sheep	Ovis aries	Ruminant	Foregut	Sheep	1	Grass pastures	SF6	Kikuyu 1999				12	36.8	697	0.697	46.6495	9.7	90.3	23.4		43.1	24.2			629.391	300.407	168.674																6.14525	0.166991	4.4	243.138	1.9
Ulyatt et al. (2002)	N Z J Agric Res 227-234	Domestic sheep	Ovis aries	Ruminant	Foregut	Sheep	1	Grass pastures	SF6	Kikuyu 1997				10	34.5	758	0.758	53.2482	10	90	21.9		48.1	27.5			682.2	364.598	208.45																21.7877	0.631528	15.6	862.036	6.3
Ulyatt et al. (2005)	N Z J Agric Res	Domestic sheep	Ovis aries	Ruminant	Foregut	Sheep	1	Grass pastures	SF6	Ballantrae				12	37.9	1389	1.389	90.9333	10.1	89.9	25		36.9	20.7			1248.71	512.541	287.523																26.9553	0.711222	19.3	1066.49	4.1
Ulyatt et al. (2005)	N Z J Agric Res	Domestic sheep	Ovis aries	Ruminant	Foregut	Sheep	1	Grass pastures	SF6	Poukawa				12	46.9	1206	1.206	67.2927	7.3	92.7	5.8		66.2	42.5			1117.96	798.372	512.55																29.8883	0.637277	21.4	1182.54	5.3
Ulyatt et al. (2005)	N Z J Agric Res	Domestic sheep	Ovis aries	Ruminant	Foregut	Sheep	1	Grass pastures	SF6	Aorangi				12	41.2	1704	1.704	104.784	10.9	89.1	30.7		31.3	18.7			1518.26	533.352	318.648																30.5866	0.742393	21.9	1210.17	3.9
Ulyatt et al. (2005)	N Z J Agric Res	Domestic sheep	Ovis aries	Ruminant	Foregut	Sheep	1	Grass pastures	SF6	Springston				12	69	1685	1.685	70.3822	9.8	90.2	29.8		35.6	17.4			1519.87	599.86	293.19																49.162	0.712493	35.2	1945.11	6.3
Vermorel (1997)	INRA Prod Anim	Domestic sheep	Ovis aries	Ruminant	Foregut	Sheep	1	herbe	Respiration chamber						27																														23	0.851852	17.503	910.001
Vermorel (1997)	INRA Prod Anim	Domestic sheep	Ovis aries	Ruminant	Foregut	Sheep	1	herbe	Respiration chamber						37																														34	0.918919	25.874	1345.22
Vermorel (1997)	INRA Prod Anim	Domestic sheep	Ovis aries	Ruminant	Foregut	Sheep	1	foin ou herbe	Respiration chamber						60																														36	0.6	27.396	1424.35
Vermorel (1997)	INRA Prod Anim	Domestic sheep	Ovis aries	Ruminant	Foregut	Sheep	1	foin ou herbe	Respiration chamber						110																														57	0.518182	43.377	2255.22
Vernet et al. (1997)	Ann Zootech	Domestic sheep	Ovis aries	Ruminant	Foregut	Sheep	1	Lucerne hay	Respiration chamber					6	65.1	1152.8	1.1528	50.3	8.1	91.9	8.6		67.8	39.4		18040	1059.42	781.598	454.203	20832.9	909	48.1	50.7		50.3	44.9	47.5	554.496	537.127	393.144	203.937	17.154	9946.62	434	32.4963	0.499176	24.7297	1285.73	6.2
Waite et al. (1964) & Armstrong (1964)	J Agric Sci	Domestic sheep	Ovis aries	Ruminant	Foregut	Sheep	1	Grass	Respiration chamber	Ryegrass S 24	1	103	8	1	72	1188.49	1.18849	48.0833	7.4	92.6						19125.3	1100.54			22730.1	919.608		88				84.417		968.473				19188.1	776.306	32.0635	0.445326	24.4003	1268.6	5.58114
Waite et al. (1964) & Armstrong (1964)	J Agric Sci	Domestic sheep	Ovis aries	Ruminant	Foregut	Sheep	1	Grass	Respiration chamber	Cocksfoot S37	1	103	2	1	64.1	1351.41	1.35141	59.6547	7.3	92.7						19992	1252.76			27017.4	1192.62		83				78.4441		1039.79				21193.6	935.537	34.6032	0.539831	26.333	1369.08	5.06741
Waite et al. (1964) & Armstrong (1964)	J Agric Sci	Domestic sheep	Ovis aries	Ruminant	Foregut	Sheep	1	Grass	Respiration chamber	Ryegrass S 23	1	Ch	3	1	62.4	1229.61	1.22961	55.3832	8.1	91.9						19401.6	1130.01			23856.4	1074.52		86				80.3264		971.808				19163	863.127	33.1217	0.530796	25.2056	1310.47	5.49316
Waite et al. (1964) & Armstrong (1964)	J Agric Sci	Domestic sheep	Ovis aries	Ruminant	Foregut	Sheep	1	Grass	Respiration chamber	Ryegrass S 23	3	L	4	1	70.8	1089.73	1.08973	44.6473	7.8	92.2						18756.9	1004.73			20440	837.443		79				74.703		793.739				15269.3	625.595	29.7354	0.419992	22.6287	1176.49	5.75584
Waite et al. (1964) & Armstrong (1964)	J Agric Sci	Domestic sheep	Ovis aries	Ruminant	Foregut	Sheep	1	Grass	Respiration chamber	Ryegrass S 23	2	Cu	2	1	66.2	1409.47	1.40947	60.7311	8.5	91.5						18752.7	1289.66			26431.3	1138.87		83				75.9702		1070.42				20079.9	865.203	41.5873	0.628207	31.6479	1645.41	6.22525
Waite et al. (1964) & Armstrong (1964)	J Agric Sci	Domestic sheep	Ovis aries	Ruminant	Foregut	Sheep	1	Grass	Respiration chamber	Ryegrass S 24	2	107	2	1	68.4	1155.16	1.15516	48.5679	7	93						19158.8	1074.3			22131.4	930.502		80				74.8581		859.437				16567.2	696.556	34.4974	0.504347	26.2525	1364.9	6.16723
Waite et al. (1964) & Armstrong (1964)	J Agric Sci	Domestic sheep	Ovis aries	Ruminant	Foregut	Sheep	1	Grass	Respiration chamber	Ryegrass S 24	1	106	6	1	72.9	1173.82	1.17382	47.0495	7.4	92.6						19125.3	1086.96			22449.6	899.836		88				83.1406		956.521				18664.8	748.129	39.1534	0.537084	29.7958	1549.12	6.90041
Waite et al. (1964) & Armstrong (1964)	J Agric Sci	Domestic sheep	Ovis aries	Ruminant	Foregut	Sheep	1	Grass	Respiration chamber	Cocksfoot S37	1	100	6	1	68.6	1263.66	1.26366	53.0138	7.3	92.7						19992	1171.42			25263.2	1059.85		83				77.4776		972.276				19573.3	821.147	40.6349	0.592346	30.9232	1607.73	6.36394
Waite et al. (1964) & Armstrong (1964)	J Agric Sci	Domestic sheep	Ovis aries	Ruminant	Foregut	Sheep	1	Grass	Respiration chamber	Ryegrass S 24	1	105	2	1	68.6	1169	1.169	49.0424	7.4	92.6						19125.3	1082.5			22357.5	937.952		88				82.603		952.596				18468	774.776	39.8942	0.581548	30.3595	1578.42	7.05993
Waite et al. (1964) & Armstrong (1964)	J Agric Sci	Domestic sheep	Ovis aries	Ruminant	Foregut	Sheep	1	Grass	Respiration chamber	Cocksfoot S37	2	106	2	1	65.9	1269.13	1.26913	54.8709	7.2	92.8						19368.1	1177.75			24580.7	1062.75		77				74.3826		906.87				18283.8	790.499	38.0952	0.578076	28.9905	1507.25	6.13183
Waite et al. (1964) & Armstrong (1964)	J Agric Sci	Domestic sheep	Ovis aries	Ruminant	Foregut	Sheep	1	Grass	Respiration chamber	Ryegrass S 23	3	L	2	1	71	1393.3	1.3933	56.9642	7.8	92.2						18756.9	1284.63			26134	1068.47		79				73.0054		1014.85				19079.2	780.041	42.7513	0.602131	32.5338	1691.47	6.47228
Waite et al. (1964) & Armstrong (1964)	J Agric Sci	Domestic sheep	Ovis aries	Ruminant	Foregut	Sheep	1	Grass	Respiration chamber	Cocksfoot S37	1	106	4	1	67.4	1389.95	1.38995	59.0886	7.3	92.7						19992	1288.48			27787.8	1181.3		83				78.0925		1069.44				21700.2	922.505	45.1852	0.670403	34.3859	1787.76	6.43363
Waite et al. (1964) & Armstrong (1964)	J Agric Sci	Domestic sheep	Ovis aries	Ruminant	Foregut	Sheep	1	Grass	Respiration chamber	Ryegrass S 24	1	103	7	1	61.3	559.107	0.559107	25.5211	7.4	92.6						19125.3	517.733			10693.1	488.099		88				83.1637		455.605				8892.76	405.921	19.2593	0.31418	14.6563	761.998	7.12608
Waite et al. (1964) & Armstrong (1964)	J Agric Sci	Domestic sheep	Ovis aries	Ruminant	Foregut	Sheep	1	Grass	Respiration chamber	Ryegrass S 23	2	J	2	1	61.7	1118.55	1.11855	50.8093	8.5	91.5						18752.7	1023.48			20975.9	952.809		83				78.1637		849.485				16395.5	744.751	36.0847	0.58484	27.4604	1427.7	6.80639
Waite et al. (1964) & Armstrong (1964)	J Agric Sci	Domestic sheep	Ovis aries	Ruminant	Foregut	Sheep	1	Grass	Respiration chamber	Ryegrass S 23	1	Ti	6	1	69.3	1197.67	1.19767	49.864	8.1	91.9						19401.6	1100.66			23236.7	967.443		86				81.4775		946.566				18932.7	788.248	40.2116	0.580255	30.6011	1590.98	6.84685
Waite et al. (1964) & Armstrong (1964)	J Agric Sci	Domestic sheep	Ovis aries	Ruminant	Foregut	Sheep	1	Grass	Respiration chamber	Ryegrass S 23	1	Ti	3	1	59.5	702.849	0.702849	32.8076	8.1	91.9						19401.6	645.918			13636.4	636.52		86				83.9116		555.489				11442.5	534.114	24.3386	0.409053	18.5217	962.964	7.06171
Waite et al. (1964) & Armstrong (1964)	J Agric Sci	Domestic sheep	Ovis aries	Ruminant	Foregut	Sheep	1	Grass	Respiration chamber	Ryegrass S 23	3	De	4	1	67.8	1365.85	1.36585	57.807	7.8	92.2						18756.9	1259.31			25619	1084.28		79				71.9562		994.857				18434.5	780.205	43.5979	0.643037	33.178	1724.96	6.73313
Waite et al. (1964) & Armstrong (1964)	J Agric Sci	Domestic sheep	Ovis aries	Ruminant	Foregut	Sheep	1	Grass	Respiration chamber	Ryegrass S 23	1	103	2	1	58.8	964.609	0.964609	45.4275	8.1	91.9						19401.6	886.476			18715	881.367		86				81.0067		762.369				15160.4	713.966	33.4392	0.568693	25.4472	1323.03	7.06935
Waite et al. (1964) & Armstrong (1964)	J Agric Sci	Domestic sheep	Ovis aries	Ruminant	Foregut	Sheep	1	Grass	Respiration chamber	Ryegrass S 23	1	Ch	5	1	61.8	944.54	0.94454	42.8528	8.1	91.9						19401.6	868.033			18325.6	831.414		86				80.1462		746.508				14687.3	666.347	32.8042	0.530813	24.964	1297.91	7.08248
Waite et al. (1964) & Armstrong (1964)	J Agric Sci	Domestic sheep	Ovis aries	Ruminant	Foregut	Sheep	1	Grass	Respiration chamber	Ryegrass S 23	2	101	2	1	56.6	1090.42	1.09042	52.8424	8.5	91.5						18752.7	997.736			20448.3	990.936		83				75.7985		828.121				15499.5	751.115	36.4021	0.643147	27.702	1440.26	7.04341
Waite et al. (1964) & Armstrong (1964)	J Agric Sci	Domestic sheep	Ovis aries	Ruminant	Foregut	Sheep	1	Grass	Respiration chamber	Cocksfoot S37	2	103	4	1	68.2	1267.19	1.26719	53.3952	7.2	92.8						19368.1	1175.95			24543	1034.16		77				70.8973		905.48				17400.3	733.195	40	0.58651	30.44	1582.61	6.44831
Waite et al. (1964) & Armstrong (1964)	J Agric Sci	Domestic sheep	Ovis aries	Ruminant	Foregut	Sheep	1	Grass	Respiration chamber	Ryegrass S 23	1	Ti	4	1	65.5	943.461	0.943461	40.9773	8.1	91.9						19401.6	867.041			18304.7	795.026		86				80.6725		745.655				14766.8	641.367	33.4392	0.510521	25.4472	1323.03	7.22781
Waite et al. (1964) & Armstrong (1964)	J Agric Sci	Domestic sheep	Ovis aries	Ruminant	Foregut	Sheep	1	Grass	Respiration chamber	Ryegrass S 24	1	105	1	1	61.6	634.413	0.634413	28.8527	7.4	92.6						19125.3	587.467			12133.3	551.817		88				83.7474		516.971				10161.4	462.132	23.3862	0.379647	17.7969	925.283	7.62595
Waite et al. (1964) & Armstrong (1964)	J Agric Sci	Domestic sheep	Ovis aries	Ruminant	Foregut	Sheep	1	Grass	Respiration chamber	Ryegrass S 23	2	J	5	1	65.6	1236.21	1.23621	53.631	8.5	91.5						18752.7	1131.14			23182.3	1005.72		83				76.6661		938.842				17773	771.049	42.5397	0.648471	32.3727	1683.09	7.26025
Waite et al. (1964) & Armstrong (1964)	J Agric Sci	Domestic sheep	Ovis aries	Ruminant	Foregut	Sheep	1	Grass	Respiration chamber	Ryegrass S 23	2	Cu	3	1	66.5	1118.78	1.11878	48.0427	8.5	91.5						18752.7	1023.68			20980.1	900.929		83				76.6713		849.655				16085.7	690.754	38.5185	0.579226	29.3126	1524	7.26402
Waite et al. (1964) & Armstrong (1964)	J Agric Sci	Domestic sheep	Ovis aries	Ruminant	Foregut	Sheep	1	Grass	Respiration chamber	Cocksfoot S37	1	103	1	1	55.4	609.005	0.609005	29.9908	7.3	92.7						19992	564.548			12175.2	599.576		83				80.6052		468.575				9813.86	483.29	21.3757	0.385842	16.2669	845.734	6.94635
Waite et al. (1964) & Armstrong (1964)	J Agric Sci	Domestic sheep	Ovis aries	Ruminant	Foregut	Sheep	1	Grass	Respiration chamber	Cocksfoot S37	3	100	2	1	60.7	1167.54	1.16754	53.6884	6.6	93.4						19142	1090.48			22349.1	1027.71		70				64.6684		763.339				14452.8	664.602	35.2381	0.580529	26.8162	1394.2	6.23829
Waite et al. (1964) & Armstrong (1964)	J Agric Sci	Domestic sheep	Ovis aries	Ruminant	Foregut	Sheep	1	Grass	Respiration chamber	Ryegrass S 24	1	100	4	1	64.4	1200.74	1.20074	52.8185	7.4	92.6						19125.3	1111.89			22964.6	1010.17		88				81.8778		978.463				18802.9	827.105	45.291	0.703276	34.4665	1791.95	7.8031
Waite et al. (1964) & Armstrong (1964)	J Agric Sci	Domestic sheep	Ovis aries	Ruminant	Foregut	Sheep	1	Grass	Respiration chamber	Cocksfoot S37	1	105	8	1	76.5	1283.35	1.28335	49.6134	7.3	92.7						19992	1189.67			25656.7	991.87		83				79.455		987.423				20385.5	788.09	45.9259	0.600339	34.9496	1817.07	7.08225
Waite et al. (1964) & Armstrong (1964)	J Agric Sci	Domestic sheep	Ovis aries	Ruminant	Foregut	Sheep	1	Grass	Respiration chamber	Timothy S48	1	101	6	1	61.3	1178.46	1.17846	53.7923	6.8	93.2						19167.2	1098.33			22587.8	1031.05		76				68.6747		834.728				15512.1	708.068	39.6825	0.64735	30.1984	1570.05	6.95088
Waite et al. (1964) & Armstrong (1964)	J Agric Sci	Domestic sheep	Ovis aries	Ruminant	Foregut	Sheep	1	Grass	Respiration chamber	Ryegrass S 23	3	102	3	1	60.4	1089.29	1.08929	50.2764	7.8	92.2						18756.9	1004.32			20431.6	943.027		79				72.582		793.414				14829.6	684.468	37.7778	0.62546	28.7489	1494.69	7.31557
Waite et al. (1964) & Armstrong (1964)	J Agric Sci	Domestic sheep	Ovis aries	Ruminant	Foregut	Sheep	1	Grass	Respiration chamber	Cocksfoot S37	2	100	8	1	71.7	1279.29	1.27929	51.9194	7.2	92.8						19368.1	1187.18			24777.5	1005.58		77				68.9422		914.13				17082.1	693.271	43.5979	0.60806	33.178	1724.96	6.96181
Waite et al. (1964) & Armstrong (1964)	J Agric Sci	Domestic sheep	Ovis aries	Ruminant	Foregut	Sheep	1	Grass	Respiration chamber	Ryegrass S 24	1	100	3	1	55.2	618.87	0.61887	30.5594	7.4	92.6						19125.3	573.074			11836.1	584.459		88				85.6385		504.305				10136.2	500.521	24.127	0.437083	18.3606	954.59	8.06509
Waite et al. (1964) & Armstrong (1964)	J Agric Sci	Domestic sheep	Ovis aries	Ruminant	Foregut	Sheep	1	Grass	Respiration chamber	Ryegrass S 23	4	S	6	1	65.8	1339.54	1.33954	57.9811	5.7	94.3						19112.7	1263.19			25602.3	1108.18		62				56.5985		783.175				14490.5	627.212	37.672	0.572522	28.6684	1490.5	5.82175
Waite et al. (1964) & Armstrong (1964)	J Agric Sci	Domestic sheep	Ovis aries	Ruminant	Foregut	Sheep	1	Grass	Respiration chamber	Ryegrass S 23	2	J	3	1	59.3	731.19	0.73119	34.2168	8.5	91.5						18752.7	669.039			13711.8	641.656		83				79.084		555.302				10843.8	507.447	26.7725	0.451475	20.3739	1059.26	7.72519
Waite et al. (1964) & Armstrong (1964)	J Agric Sci	Domestic sheep	Ovis aries	Ruminant	Foregut	Sheep	1	Grass	Respiration chamber	Ryegrass S 23	1	Ch	6	1	60.2	684.722	0.684722	31.6823	8.1	91.9						19401.6	629.259			13284.7	614.688		86				82.3511		541.163				10940.1	506.202	26.2434	0.435937	19.9712	1038.33	7.81595
Waite et al. (1964) & Armstrong (1964)	J Agric Sci	Domestic sheep	Ovis aries	Ruminant	Foregut	Sheep	1	Grass	Respiration chamber	Cocksfoot S37	2	106	1	1	59.1	660.398	0.660398	30.9824	7.2	92.8						19368.1	612.849			12790.7	600.071		77				74.3699		471.894				9512.41	446.272	22.963	0.388544	17.4748	908.536	7.10311
Waite et al. (1964) & Armstrong (1964)	J Agric Sci	Domestic sheep	Ovis aries	Ruminant	Foregut	Sheep	1	Grass	Respiration chamber	Timothy S48	2	101	8	1	68.1	1139.9	1.1399	48.0846	5.6	94.4						19003.9	1076.06			21662.5	913.794		70				64.5149		753.245				13975.5	589.533	36.9312	0.542309	28.1047	1461.19	6.74526
Waite et al. (1964) & Armstrong (1964)	J Agric Sci	Domestic sheep	Ovis aries	Ruminant	Foregut	Sheep	1	Grass	Respiration chamber	Ryegrass S 23	4	100	3	1	56.8	1171.74	1.17174	56.6331	5.7	94.3						19112.7	1104.95			22395.2	1082.41		62				57.6556		685.07				12912.1	624.073	33.8624	0.59617	25.7693	1339.78	5.98243
Waite et al. (1964) & Armstrong (1964)	J Agric Sci	Domestic sheep	Ovis aries	Ruminant	Foregut	Sheep	1	Grass	Respiration chamber	Ryegrass S 24	2	101	4	1	62.7	1150.57	1.15057	51.6371	7	93						19158.8	1070.03			22043.5	989.304		80				73.9221		856.023				16295	731.315	42.328	0.675088	32.2116	1674.72	7.59734
Waite et al. (1964) & Armstrong (1964)	J Agric Sci	Domestic sheep	Ovis aries	Ruminant	Foregut	Sheep	1	Grass	Respiration chamber	Cocksfoot S37	3	103	6	1	71	1180.66	1.18066	48.2706	6.6	93.4						19142	1102.74			22600.3	923.999		70				67.5435		771.919				15265.1	624.101	38.3069	0.539533	29.1515	1515.62	6.70619
Waite et al. (1964) & Armstrong (1964)	J Agric Sci	Domestic sheep	Ovis aries	Ruminant	Foregut	Sheep	1	Grass	Respiration chamber	Cocksfoot S37	1	100	5	1	59.5	538.639	0.538639	25.1426	7.3	92.7						19992	499.318			10768.4	502.65		83				78.2659		414.434				8428.03	393.404	20.8466	0.350362	15.8642	824.8	7.65941
Waite et al. (1964) & Armstrong (1964)	J Agric Sci	Domestic sheep	Ovis aries	Ruminant	Foregut	Sheep	1	Grass	Respiration chamber	Cocksfoot S37	1	106	3	1	61.1	660.942	0.660942	30.2435	7.3	92.7						19992	612.694			13213.5	604.628		83				79.4994		508.536				10504.7	480.675	25.6085	0.419124	19.488	1013.21	7.66793
Waite et al. (1964) & Armstrong (1964)	J Agric Sci	Domestic sheep	Ovis aries	Ruminant	Foregut	Sheep	1	Grass	Respiration chamber	Ryegrass S 23	1	Ti	5	1	61.1	489.642	0.489642	22.4051	8.1	91.9						19401.6	449.981			9499.85	434.696		86				83.2966		386.983				7913.05	362.087	19.5767	0.320405	14.8979	774.558	8.15337
Waite et al. (1964) & Armstrong (1964)	J Agric Sci	Domestic sheep	Ovis aries	Ruminant	Foregut	Sheep	1	Grass	Respiration chamber	Ryegrass S 24	1	106	5	1	64.6	535.902	0.535902	23.5186	7.4	92.6						19125.3	496.245			10249.3	449.8		88				84.9265		436.696				8704.36	381.999	22.1164	0.342359	16.8306	875.041	8.53758
Waite et al. (1964) & Armstrong (1964)	J Agric Sci	Domestic sheep	Ovis aries	Ruminant	Foregut	Sheep	1	Grass	Respiration chamber	Ryegrass S 23	4	S	5	1	63.6	1182.26	1.18226	52.4951	5.7	94.3						19112.7	1114.87			22596.2	1003.33		62				57.5134		691.218				12995.8	577.047	35.0265	0.55073	26.6551	1385.83	6.13304
Waite et al. (1964) & Armstrong (1964)	J Agric Sci	Domestic sheep	Ovis aries	Ruminant	Foregut	Sheep	1	Grass	Respiration chamber	Cocksfoot S37	2	105	6	1	76.2	1279.07	1.27907	49.5941	7.2	92.8						19368.1	1186.98			24773.3	960.545		77				73.179		913.976				18128.8	702.917	46.455	0.609646	35.3523	1838.01	7.4193
Waite et al. (1964) & Armstrong (1964)	J Agric Sci	Domestic sheep	Ovis aries	Ruminant	Foregut	Sheep	1	Grass	Respiration chamber	Ryegrass S 24	2	104	8	1	69.8	1199.52	1.19952	49.6725	7	93						19158.8	1115.55			22981.3	951.665		80				77.8648		892.442				17894.4	741.012	45.5026	0.6519	34.6275	1800.32	7.83385
Waite et al. (1964) & Armstrong (1964)	J Agric Sci	Domestic sheep	Ovis aries	Ruminant	Foregut	Sheep	1	Grass	Respiration chamber	Ryegrass S 24	2	102	6	1	68.6	1160.62	1.16062	48.6908	7	93						19158.8	1079.38			22236.1	932.858		80				75.9556		863.502				16889.6	708.557	44.3386	0.646336	33.7417	1754.27	7.88929
Waite et al. (1964) & Armstrong (1964)	J Agric Sci	Domestic sheep	Ovis aries	Ruminant	Foregut	Sheep	1	Grass	Respiration chamber	Timothy S48	1	104	11	1	70.4	1111.4	1.1114	45.729	6.8	93.2						19167.2	1035.83			21302.4	876.496		76				70.8923		787.229				15101.8	621.368	40.4233	0.574194	30.7621	1599.36	7.50786
Waite et al. (1964) & Armstrong (1964)	J Agric Sci	Domestic sheep	Ovis aries	Ruminant	Foregut	Sheep	1	Grass	Respiration chamber	Cocksfoot S37	3	100	1	1	53	667.542	0.667542	33.9838	6.6	93.4						19142	623.484			12778.1	650.519		70				68.021		436.439				8691.8	442.489	22.5397	0.425277	17.1527	891.788	6.97903
Waite et al. (1964) & Armstrong (1964)	J Agric Sci	Domestic sheep	Ovis aries	Ruminant	Foregut	Sheep	1	Grass	Respiration chamber	Timothy S48	2	107	6	1	69.2	1113.24	1.11324	46.3991	5.6	94.4						19003.9	1050.9			21155.9	881.763		70				63.4277		735.63				13418.7	559.282	38.0952	0.550509	28.9905	1507.25	7.12448
Waite et al. (1964) & Armstrong (1964)	J Agric Sci	Domestic sheep	Ovis aries	Ruminant	Foregut	Sheep	1	Grass	Respiration chamber	Cocksfoot S37	3	103	5	1	62.9	640.639	0.640639	28.683	6.6	93.4						19142	598.357			12263.1	549.052		70				69.6142		418.85				8536.89	382.218	21.6931	0.344883	16.5085	858.294	6.99898
Waite et al. (1964) & Armstrong (1964)	J Agric Sci	Domestic sheep	Ovis aries	Ruminant	Foregut	Sheep	1	Grass	Respiration chamber	Timothy S48	1	101	5	1	56.7	588.248	0.588248	28.4691	6.8	93.2						19167.2	548.247			11275.1	545.672		76				70.0334		416.668				7896.3	382.152	21.5873	0.380728	16.4279	854.107	7.57519
Waite et al. (1964) & Armstrong (1964)	J Agric Sci	Domestic sheep	Ovis aries	Ruminant	Foregut	Sheep	1	Grass	Respiration chamber	Timothy S48	1	107	8	1	73	1211.23	1.21123	48.4991	6.8	93.2						19167.2	1128.86			23215.8	929.59		76				69.0712		857.937				16035.4	642.08	44.5503	0.610278	33.9028	1762.64	7.59243
Waite et al. (1964) & Armstrong (1964)	J Agric Sci	Domestic sheep	Ovis aries	Ruminant	Foregut	Sheep	1	Grass	Respiration chamber	Ryegrass S 23	4	S	3	1	62.3	979.189	0.979189	44.1571	5.7	94.3						19112.7	923.376			18715	843.964		62				57.8971		572.493				10835.4	488.63	29.7354	0.477295	22.6287	1176.49	6.28635
Waite et al. (1964) & Armstrong (1964)	J Agric Sci	Domestic sheep	Ovis aries	Ruminant	Foregut	Sheep	1	Grass	Respiration chamber	Ryegrass S 23	3	De	6	1	66.7	1053.35	1.05335	45.1313	7.8	92.2						18756.9	971.187			19757.5	846.521		79				74.0835		767.238				14637.1	627.132	39.8942	0.598114	30.3595	1578.42	7.98898
Waite et al. (1964) & Armstrong (1964)	J Agric Sci	Domestic sheep	Ovis aries	Ruminant	Foregut	Sheep	1	Grass	Respiration chamber	Ryegrass S 24	2	107	1	1	59.2	646.198	0.646198	30.2778	7	93						19158.8	600.964			12380.4	580.086		80				74.5688		480.771				9231.89	432.563	25.0794	0.423638	19.0854	992.272	8.01488
Waite et al. (1964) & Armstrong (1964)	J Agric Sci	Domestic sheep	Ovis aries	Ruminant	Foregut	Sheep	1	Grass	Respiration chamber	Ryegrass S 23	1	103	3	1	53.6	474.968	0.474968	23.9768	8.1	91.9						19401.6	436.495			9215.15	465.188		86				83.871		375.386				7728.83	390.158	19.6825	0.367212	14.9784	778.745	8.4507
Waite et al. (1964) & Armstrong (1964)	J Agric Sci	Domestic sheep	Ovis aries	Ruminant	Foregut	Sheep	1	Grass	Respiration chamber	Ryegrass S 23	3	De	2	1	58.8	722.768	0.722768	34.0381	7.8	92.2						18756.9	666.392			13556.9	638.449		79				75.3243		526.45				10211.6	480.907	27.619	0.469712	21.0181	1092.75	8.06053
Waite et al. (1964) & Armstrong (1964)	J Agric Sci	Domestic sheep	Ovis aries	Ruminant	Foregut	Sheep	1	Grass	Respiration chamber	Timothy S48	3	101	12	1	60	1118.4	1.1184	51.8782	5.2	94.8						18882.5	1060.25			21118.2	979.589		62				56.1459		657.353				11857	549.999	34.4974	0.574956	26.2525	1364.9	6.46312
Waite et al. (1964) & Armstrong (1964)	J Agric Sci	Domestic sheep	Ovis aries	Ruminant	Foregut	Sheep	1	Grass	Respiration chamber	Timothy S48	2	104	4	1	63.8	1020.05	1.02005	45.1861	5.6	94.4						19003.9	962.926			19384.9	858.712		70				63.4989		674.048				12309.2	545.273	35.4497	0.555638	26.9772	1402.58	7.23542
Waite et al. (1964) & Armstrong (1964)	J Agric Sci	Domestic sheep	Ovis aries	Ruminant	Foregut	Sheep	1	Grass	Respiration chamber	Cocksfoot S37	3	106	8	1	77.3	1216.54	1.21654	46.6649	6.6	93.4						19142	1136.24			23287	893.261		70				66.0374		795.371				15378.1	589.887	42.1164	0.544843	32.0506	1666.35	7.1557
Waite et al. (1964) & Armstrong (1964)	J Agric Sci	Domestic sheep	Ovis aries	Ruminant	Foregut	Sheep	1	Grass	Respiration chamber	Cocksfoot S37	3	105	4	1	73.4	1172.57	1.17257	46.7593	6.6	93.4						19142	1095.18			22445.4	895.068		70				66.6667		766.628				14963.6	596.712	40.7407	0.555051	31.0037	1611.92	7.1815
Waite et al. (1964) & Armstrong (1964)	J Agric Sci	Domestic sheep	Ovis aries	Ruminant	Foregut	Sheep	1	Grass	Respiration chamber	Timothy S48	1	102	4	1	68.5	1156.4	1.1564	48.5669	6.8	93.2						19167.2	1077.76			22164.9	930.89		76				70.5705		819.101				15641.9	656.933	43.5979	0.636465	33.178	1724.96	7.7824
Waite et al. (1964) & Armstrong (1964)	J Agric Sci	Domestic sheep	Ovis aries	Ruminant	Foregut	Sheep	1	Grass	Respiration chamber	Ryegrass S 23	1	Ch	2	1	55	500.647	0.500647	24.7891	8.1	91.9						19401.6	460.095			9713.38	480.948		86				81.6379		395.682				7929.8	392.636	21.4815	0.390572	16.3474	849.92	8.75
Waite et al. (1964) & Armstrong (1964)	J Agric Sci	Domestic sheep	Ovis aries	Ruminant	Foregut	Sheep	1	Grass	Respiration chamber	Ryegrass S 24	2	101	3	1	54.1	625	0.625	31.3316	7	93						19158.8	581.25			11974.2	600.275		80				75.2098		465				9005.81	451.466	25.291	0.467486	19.2465	1000.65	8.35664
Waite et al. (1964) & Armstrong (1964)	J Agric Sci	Domestic sheep	Ovis aries	Ruminant	Foregut	Sheep	1	Grass	Respiration chamber	Cocksfoot S37	2	100	7	1	64.9	631.647	0.631647	27.6243	7.2	92.8						19368.1	586.169			12233.8	535.031		77				69.2676		451.35				8474.08	370.603	24.5503	0.378278	18.6828	971.338	7.93977
Waite et al. (1964) & Armstrong (1964)	J Agric Sci	Domestic sheep	Ovis aries	Ruminant	Foregut	Sheep	1	Grass	Respiration chamber	Timothy S48	2	102	11	1	66.9	1123.38	1.12338	48.0237	5.6	94.4						19003.9	1060.47			21348.5	912.636		70				64.5813		742.326				13787.1	589.392	40.6349	0.607398	30.9232	1607.73	7.53089
Waite et al. (1964) & Armstrong (1964)	J Agric Sci	Domestic sheep	Ovis aries	Ruminant	Foregut	Sheep	1	Grass	Respiration chamber	Timothy S48	2	101	7	1	61.4	648.601	0.648601	29.57	5.6	94.4						19003.9	612.279			12325.9	561.945		70				63.7908		428.596				7862.81	358.469	23.4921	0.382607	17.8775	929.47	7.54076
Waite et al. (1964) & Armstrong (1964)	J Agric Sci	Domestic sheep	Ovis aries	Ruminant	Foregut	Sheep	1	Grass	Respiration chamber	Cocksfoot S37	2	103	3	1	61.6	658.452	0.658452	29.946	7.2	92.8						19368.1	611.044			12753	579.998		77				76.9206		470.504				9809.67	446.138	25.8201	0.419158	19.6491	1021.58	8.01051
Waite et al. (1964) & Armstrong (1964)	J Agric Sci	Domestic sheep	Ovis aries	Ruminant	Foregut	Sheep	1	Grass	Respiration chamber	Ryegrass S 23	2	101	3	1	51.3	464.613	0.464613	24.2383	8.5	91.5						18752.7	425.121			8712.73	454.534		83				77.2705		352.85				6732.37	351.221	19.3651	0.377487	14.7368	766.184	8.79385
Waite et al. (1964) & Armstrong (1964)	J Agric Sci	Domestic sheep	Ovis aries	Ruminant	Foregut	Sheep	1	Grass	Respiration chamber	Ryegrass S 24	2	102	5	1	61	596.591	0.596591	27.3325	7	93						19158.8	554.83			11430	523.658		80				77.1429		443.864				8817.4	403.965	24.5503	0.402463	18.6828	971.338	8.49817
Waite et al. (1964) & Armstrong (1964)	J Agric Sci	Domestic sheep	Ovis aries	Ruminant	Foregut	Sheep	1	Grass	Respiration chamber	Timothy S48	3	107	4	1	68.4	1085.59	1.08559	45.6429	5.2	94.8						18882.5	1029.14			20498.6	861.85		62				56.2296		638.065				11526.3	484.614	35.3439	0.516724	26.8967	1398.39	6.8219
Waite et al. (1964) & Armstrong (1964)	J Agric Sci	Domestic sheep	Ovis aries	Ruminant	Foregut	Sheep	1	Grass	Respiration chamber	Ryegrass S 23	3	102	2	1	52.8	553.125	0.553125	28.2389	7.8	92.2						18756.9	509.981			10374.9	529.673		79				73.9709		402.885				7674.4	391.804	22.328	0.42288	16.9916	883.415	8.51493
Waite et al. (1964) & Armstrong (1964)	J Agric Sci	Domestic sheep	Ovis aries	Ruminant	Foregut	Sheep	1	Grass	Respiration chamber	Timothy S48	2	107	5	1	63.8	667.107	0.667107	29.5515	5.6	94.4						19003.9	629.749			12677.6	561.594		70				68.362		440.824				8666.68	383.917	24.4444	0.383142	18.6022	967.151	7.6288
Waite et al. (1964) & Armstrong (1964)	J Agric Sci	Domestic sheep	Ovis aries	Ruminant	Foregut	Sheep	1	Grass	Respiration chamber	Ryegrass S 23	4	S	2	1	58.8	693.319	0.693319	32.6513	5.7	94.3						19112.7	653.8			13251.2	624.055		62				60.9795		405.356				8080.52	380.545	22.5397	0.383328	17.1527	891.788	6.72986
Waite et al. (1964) & Armstrong (1964)	J Agric Sci	Domestic sheep	Ovis aries	Ruminant	Foregut	Sheep	1	Grass	Respiration chamber	Timothy S48	3	107	3	1	64.6	751.663	0.751663	32.9875	5.2	94.8						18882.5	712.576			14193.3	622.885		62				55.0737		441.797				7816.76	343.046	24.6561	0.381673	18.7633	975.524	6.87316
Waite et al. (1964) & Armstrong (1964)	J Agric Sci	Domestic sheep	Ovis aries	Ruminant	Foregut	Sheep	1	Grass	Respiration chamber	Timothy S48	1	104	10	1	64.3	614.46	0.61446	27.0605	6.8	93.2						19167.2	572.677			11777.5	518.673		76				74.1913		435.235				8737.85	384.81	24.3386	0.378517	18.5217	962.964	8.17632
Waite et al. (1964) & Armstrong (1964)	J Agric Sci	Domestic sheep	Ovis aries	Ruminant	Foregut	Sheep	1	Grass	Respiration chamber	Ryegrass S 24	2	104	7	1	61.5	633.523	0.633523	28.8473	7	93						19158.8	589.176			12137.5	552.68		80				74.7499		471.341				9072.8	413.128	26.455	0.430163	20.1323	1046.7	8.62366
Waite et al. (1964) & Armstrong (1964)	J Agric Sci	Domestic sheep	Ovis aries	Ruminant	Foregut	Sheep	1	Grass	Respiration chamber	Timothy S48	2	104	3	1	59.6	647.72	0.64772	30.1962	5.6	94.4						19003.9	611.447			12309.2	573.845		70				66.9048		428.013				8235.44	383.93	24.127	0.404815	18.3606	954.59	7.7551
Waite et al. (1964) & Armstrong (1964)	J Agric Sci	Domestic sheep	Ovis aries	Ruminant	Foregut	Sheep	1	Grass	Respiration chamber	Ryegrass S 23	2	J	6	1	59.2	424.425	0.424425	19.8866	8.5	91.5						18752.7	388.349			7959.11	372.926		83				80.8522		322.33				6435.11	301.519	18.2011	0.30745	13.851	720.13	9.04787
Waite et al. (1964) & Armstrong (1964)	J Agric Sci	Domestic sheep	Ovis aries	Ruminant	Foregut	Sheep	1	Grass	Respiration chamber	Cocksfoot S37	3	106	7	1	70.1	677.165	0.677165	27.9516	6.6	93.4						19142	632.472			12962.3	535.05		70				65.7623		442.731				8524.32	351.861	25.0794	0.357766	19.0854	992.272	7.65504
Waite et al. (1964) & Armstrong (1964)	J Agric Sci	Domestic sheep	Ovis aries	Ruminant	Foregut	Sheep	1	Grass	Respiration chamber	Ryegrass S 23	3	L	3	1	64.3	513.839	0.513839	22.6292	7.8	92.2						18756.9	473.76			9638.01	424.453		79				76.4118		374.27				7364.58	324.332	21.2698	0.330791	16.1863	841.547	8.73154
Waite et al. (1964) & Armstrong (1964)	J Agric Sci	Domestic sheep	Ovis aries	Ruminant	Foregut	Sheep	1	Grass	Respiration chamber	Ryegrass S 23	3	L	5	1	67.3	711.161	0.711161	30.2661	7.8	92.2						18756.9	655.69			13339.1	567.697		79				74.231		517.995				9901.78	421.407	29.5238	0.43869	22.4676	1168.12	8.75706
Waite et al. (1964) & Armstrong (1964)	J Agric Sci	Domestic sheep	Ovis aries	Ruminant	Foregut	Sheep	1	Grass	Respiration chamber	Timothy S48	1	107	7	1	65.5	637.396	0.637396	27.684	6.8	93.2						19167.2	594.053			12217.1	530.624		76				73.2008		451.481				8943	388.421	25.9259	0.395816	19.7296	1025.77	8.39616
Waite et al. (1964) & Armstrong (1964)	J Agric Sci	Domestic sheep	Ovis aries	Ruminant	Foregut	Sheep	1	Grass	Respiration chamber	Cocksfoot S37	2	105	5	1	67.5	629.918	0.629918	26.7489	7.2	92.8						19368.1	584.564			12200.3	518.077		77				74.3995		450.114				9076.98	385.446	25.9259	0.384088	19.7296	1025.77	8.40769
Waite et al. (1964) & Armstrong (1964)	J Agric Sci	Domestic sheep	Ovis aries	Ruminant	Foregut	Sheep	1	Grass	Respiration chamber	Cocksfoot S37	3	105	3	1	68.8	710.192	0.710192	29.7293	6.6	93.4						19142	663.32			13594.5	569.08		70				68.5864		464.324				9324	390.311	26.7725	0.389135	20.3739	1059.26	7.79181
Waite et al. (1964) & Armstrong (1964)	J Agric Sci	Domestic sheep	Ovis aries	Ruminant	Foregut	Sheep	1	Grass	Respiration chamber	Ryegrass S 23	4	100	2	1	52.4	651.26	0.65126	33.4392	5.7	94.3						19112.7	614.138			12447.4	639.114		62				63.3031		380.765				7879.56	404.579	22.0106	0.420049	16.7501	870.854	6.9963
Waite et al. (1964) & Armstrong (1964)	J Agric Sci	Domestic sheep	Ovis aries	Ruminant	Foregut	Sheep	1	Grass	Respiration chamber	Ryegrass S 23	2	Cu	5	1	63	713.329	0.713329	31.8995	8.5	91.5						18752.7	652.696			13376.8	598.202		83				77.2144		541.738				10328.8	461.898	31.3228	0.497187	23.8366	1239.29	9.26448
Waite et al. (1964) & Armstrong (1964)	J Agric Sci	Domestic sheep	Ovis aries	Ruminant	Foregut	Sheep	1	Grass	Respiration chamber	Ryegrass S 23	3	De	5	1	59.6	504.688	0.504688	23.5282	7.8	92.2						18756.9	465.322			9466.35	441.314		79				80.0088		367.604				7573.92	353.091	21.2698	0.356877	16.1863	841.547	8.88987
Waite et al. (1964) & Armstrong (1964)	J Agric Sci	Domestic sheep	Ovis aries	Ruminant	Foregut	Sheep	1	Grass	Respiration chamber	Timothy S48	3	104	6	1	68.2	1098	1.098	46.2664	5.2	94.8						18882.5	1040.91			20733	873.624		62				57.0275		645.363				11823.5	498.206	37.4603	0.549272	28.5073	1482.13	7.14863
Waite et al. (1964) & Armstrong (1964)	J Agric Sci	Domestic sheep	Ovis aries	Ruminant	Foregut	Sheep	1	Grass	Respiration chamber	Timothy S48	1	102	3	1	57.8	645.478	0.645478	30.7919	6.8	93.2						19167.2	601.586			12372	590.193		76				71.9797		457.205				8905.32	424.819	26.5608	0.45953	20.2128	1050.89	8.49408
Waite et al. (1964) & Armstrong (1964)	J Agric Sci	Domestic sheep	Ovis aries	Ruminant	Foregut	Sheep	1	Grass	Respiration chamber	Timothy S48	2	102	10	1	60.8	656.532	0.656532	30.1529	5.6	94.4						19003.9	619.766			12476.7	573.021		70				66.9128		433.837				8348.48	383.424	25.291	0.41597	19.2465	1000.65	8.02013
Waite et al. (1964) & Armstrong (1964)	J Agric Sci	Domestic sheep	Ovis aries	Ruminant	Foregut	Sheep	1	Grass	Respiration chamber	Timothy S48	3	102	8	1	68	1125.72	1.12572	47.5389	5.2	94.8						18882.5	1067.18			21256.4	897.651		62				54.6977		661.654				11626.7	490.994	38.6243	0.568005	29.3931	1528.18	7.18929
Waite et al. (1964) & Armstrong (1964)	J Agric Sci	Domestic sheep	Ovis aries	Ruminant	Foregut	Sheep	1	Grass	Respiration chamber	Ryegrass S 23	1	Ch	4	1	54.5	283.341	0.283341	14.1257	8.1	91.9						19401.6	260.39			5497.27	274.062		86				84.1584		223.935				4626.41	230.647	13.1217	0.240765	9.98561	519.163	9.44402
Waite et al. (1964) & Armstrong (1964)	J Agric Sci	Domestic sheep	Ovis aries	Ruminant	Foregut	Sheep	1	Grass	Respiration chamber	Ryegrass S 23	4	Do	5	1	63	1093.1	1.0931	48.8826	5.7	94.3						19112.7	1030.79			20892.1	934.281		62				60.6613		639.092				12673.4	566.747	37.672	0.597968	28.6684	1490.5	7.13427
Waite et al. (1964) & Armstrong (1964)	J Agric Sci	Domestic sheep	Ovis aries	Ruminant	Foregut	Sheep	1	Grass	Respiration chamber	Ryegrass S 23	2	Cu	4	1	61.9	504.13	0.50413	22.8441	8.5	91.5						18752.7	461.279			9453.79	428.389		83				78.2551		382.862				7398.08	335.236	22.6455	0.36584	17.2332	895.975	9.47741
Waite et al. (1964) & Armstrong (1964)	J Agric Sci	Domestic sheep	Ovis aries	Ruminant	Foregut	Sheep	1	Grass	Respiration chamber	Cocksfoot S37	1	105	7	1	66.6	579.267	0.579267	24.847	7.3	92.7						19992	536.981			11580.7	496.74		83				78.7419		445.694				9118.85	391.142	26.6667	0.4004	20.2933	1055.07	9.11063
Waite et al. (1964) & Armstrong (1964)	J Agric Sci	Domestic sheep	Ovis aries	Ruminant	Foregut	Sheep	1	Grass	Respiration chamber	Ryegrass S 23	4	Do	3	1	60.2	979.189	0.979189	45.3074	5.7	94.3						19112.7	923.376			18715	865.949		62				62.774		572.493				11748.2	543.591	34.2857	0.56953	26.0914	1356.52	7.24832
Waite et al. (1964) & Armstrong (1964)	J Agric Sci	Domestic sheep	Ovis aries	Ruminant	Foregut	Sheep	1	Grass	Respiration chamber	Ryegrass S 23	2	J	4	1	56.9	297.388	0.297388	14.3545	8.5	91.5						18752.7	272.11			5576.82	269.186		83				78.8288		225.851				4396.14	212.196	13.545	0.238049	10.3077	535.91	9.60961
Waite et al. (1964) & Armstrong (1964)	J Agric Sci	Domestic sheep	Ovis aries	Ruminant	Foregut	Sheep	1	Grass	Respiration chamber	Ryegrass S 23	1	Ti	2	1	56.2	289.814	0.289814	14.1194	8.1	91.9						19401.6	266.339			5622.87	273.94		86				82.1296		229.052				4618.04	224.986	13.7566	0.24478	10.4688	544.284	9.67982
Waite et al. (1964) & Armstrong (1964)	J Agric Sci	Domestic sheep	Ovis aries	Ruminant	Foregut	Sheep	1	Grass	Respiration chamber	Ryegrass S 23	4	Do	6	1	67	1274.26	1.27426	54.4129	5.7	94.3						19112.7	1201.63			24354.6	1039.98		62				61.6985		745.009				15026.4	641.652	44.8677	0.669668	34.1443	1775.2	7.28898
Waite et al. (1964) & Armstrong (1964)	J Agric Sci	Domestic sheep	Ovis aries	Ruminant	Foregut	Sheep	1	Grass	Respiration chamber	Timothy S48	3	102	7	1	65.5	709.313	0.709313	30.8075	5.2	94.8						18882.5	672.428			13393.6	581.722		62				57.1741		416.906				7657.66	332.594	25.1852	0.384507	19.1659	996.458	7.43982
Waite et al. (1964) & Armstrong (1964)	J Agric Sci	Domestic sheep	Ovis aries	Ruminant	Foregut	Sheep	1	Grass	Respiration chamber	Timothy S48	3	104	5	1	61.5	691.796	0.691796	31.5008	5.2	94.8						18882.5	655.823			13062.8	594.813		62				57.8526		406.61				7557.17	344.115	24.8677	0.404353	18.9243	983.898	7.53205
Waite et al. (1964) & Armstrong (1964)	J Agric Sci	Domestic sheep	Ovis aries	Ruminant	Foregut	Sheep	1	Grass	Respiration chamber	Timothy S48	3	101	11	1	57.5	688.027	0.688027	32.9499	5.2	94.8						18882.5	652.249			12991.6	622.176		62				58.6529		404.395				7619.98	364.924	24.8677	0.432482	18.9243	983.898	7.57332
Waite et al. (1964) & Armstrong (1964)	J Agric Sci	Domestic sheep	Ovis aries	Ruminant	Foregut	Sheep	1	Grass	Respiration chamber	Ryegrass S 23	3	De	3	1	53.4	304.911	0.304911	15.4354	7.8	92.2						18756.9	281.128			5719.17	289.519		79				82.5037		222.091				4718.52	238.864	13.9683	0.261578	10.6298	552.658	9.66325
Waite et al. (1964) & Armstrong (1964)	J Agric Sci	Domestic sheep	Ovis aries	Ruminant	Foregut	Sheep	1	Grass	Respiration chamber	Ryegrass S 23	4	Do	4	1	57.7	686.09	0.68609	32.7717	5.7	94.3						19112.7	646.983			13113.1	626.357		62				64.719		401.129				8486.64	405.372	26.1376	0.452991	19.8907	1034.14	7.88633
Waite et al. (1964) & Armstrong (1964)	J Agric Sci	Domestic sheep	Ovis aries	Ruminant	Foregut	Sheep	1	Grass	Respiration chamber	Ryegrass S 23	2	Cu	6	1	58.9	288.681	0.288681	13.5778	8.5	91.5						18752.7	264.143			5413.53	254.621		83				73.1632		219.238				3960.71	186.289	14.3915	0.244338	10.952	569.405	10.5182
Waite et al. (1964) & Armstrong (1964)	J Agric Sci	Domestic sheep	Ovis aries	Ruminant	Foregut	Sheep	1	Grass	Respiration chamber	Ryegrass S 23	3	L	6	1	61.7	281.027	0.281027	12.7654	7.8	92.2						18756.9	259.107			5271.18	239.439		79				74.9801		204.694				3952.34	179.531	13.6508	0.221245	10.3883	540.097	10.2462
Waite et al. (1964) & Armstrong (1964)	J Agric Sci	Domestic sheep	Ovis aries	Ruminant	Foregut	Sheep	1	Grass	Respiration chamber	Ryegrass S 23	4	Do	2	1	53.8	407.229	0.407229	20.4999	5.7	94.3						19112.7	384.017			7783.26	391.809		62				67.0791		238.09				5220.94	262.822	16.1905	0.300938	12.321	640.58	8.23023
Waite et al. (1964) & Armstrong (1964)	J Agric Sci	Domestic sheep	Ovis aries	Ruminant	Foregut	Sheep	1	Grass	Respiration chamber	Ryegrass S 23	4	S	4	1	56.7	404.162	0.404162	19.56	5.7	94.3						19112.7	381.125			7724.65	373.845		62				63.794		236.297				4927.86	238.491	16.6138	0.293012	12.6431	657.328	8.50949
Woodward et al. (2001)	Proc N Z Soc Anim Prod	Domestic sheep	Ovis aries	Ruminant	Foregut	Sheep	1	Lucerne	SF6					3	60	725	0.725	33.6298			26.8		31.6					229.1																	18.8547	0.314246	13.5	745.993
Woodward et al. (2001)	Proc N Z Soc Anim Prod	Domestic sheep	Ovis aries	Ruminant	Foregut	Sheep	1	Ryegrass pasture	SF6					3	60	797	0.797	36.9696			30		38.6					307.642																	22.3464	0.372439	16	884.14
Beever et al. (2015)	Br J Nutr	Domestic cattle	Bos taurus	Ruminant	Foregut	Cattletype_1	2	Ryegrass 1	Respiration chamber					6	154	2941.4	2.9414	67.2843	9.6	90.4	21.25		44	24.2	1.7	19370	2659.03	1294.22	711.819	56740	1297.92		84.1	78.2			78.7		2236.24				44654.4	1021.47	93.0109	0.603967	70.7813	3680	6.48572
Beever et al. (2015)	Br J Nutr	Domestic cattle	Bos taurus	Ruminant	Foregut	Cattletype_1	2	White clover 2	Respiration chamber					6	210	4410	4.41	79.9418	11	89	26.875		25.2	21.9	6	18800	3924.9	1111.32	965.79	81010	1468.5		78.5	80.8			72.6		3081.05				58813.3	1066.13	150.89	0.718524	114.827	5970	7.36946
Beever et al. (2015)	Br J Nutr	Domestic cattle	Bos taurus	Ruminant	Foregut	Cattletype_1	2	Ryegrass 3	Respiration chamber					6	180	3654	3.654	74.3557	8.7	91.3	13.75		43.8	24.8	2.3	18810	3336.1	1600.45	906.192	66270	1348.54		82.1	71.5			78.2		2738.94				51823.1	1054.56	136.736	0.759645	104.056	5410	8.16357
Beever et al. (2015)	Br J Nutr	Domestic cattle	Bos taurus	Ruminant	Foregut	Cattletype_1	2	Ryegrass 2	Respiration chamber					6	178	3453.2	3.4532	70.8609	9	91	15		50.5	28.6	2.2	18900	3142.41	1743.87	987.615	64970	1333.21		80.1	73.5			77		2517.07				50026.9	1026.57	129.912	0.729842	98.863	5140	7.91134
Beever et al. (2015)	Br J Nutr	Domestic cattle	Bos taurus	Ruminant	Foregut	Cattletype_1	2	White clover 1	Respiration chamber					6	200	4160	4.16	78.2205	10.5	89.5	23.75		33	29.6	5.8	18750	3723.2	1372.8	1231.36	79030	1486		74.1	77.8			70.3		2758.89				55558.1	1044.66	142.802	0.71401	108.672	5650	7.14918
Belyea et al. (1985)	J Dairy Sci	Domestic cattle	Bos taurus	Ruminant	Foregut	Cattletype_1	2	Lucerne hay	Mask	Ad lib intake				4	259	6680	6.68	103.467			16.6		49	41.6	15.4	18195		3273.2	2778.88	121543	1882.58	55.69		67.57	44.79	45.18	51.8429	3720.09		1466.07	1255.5	22.708	63011.3	975.987	225.397	0.870258	171.527	8917.88	7.33724
Belyea et al. (1985)	J Dairy Sci	Domestic cattle	Bos taurus	Ruminant	Foregut	Cattletype_1	2	Lucerne hay	Mask	Maintenance intake				4	240	4190	4.19	68.7156			16.6		49	41.6	15.4	18196.1		2053.1	1743.04	76241.6	1250.36	58.47		69.85	52.21	49.02	55.0796	2449.89		1071.92	854.438	17.5795	41993.6	688.691	191.534	0.79806	145.758	7578.11	9.93959
Boadi & Wittenberg (2002)	Can J Anim Sci	Domestic cattle	Bos taurus	Ruminant	Foregut	Cattletype_1	2	Legume/grass	SF6	Ad lib intake					310	9700	9.7	131.296	8.6	91.4	17.9		41.8	31.8		18400	8865.8	4054.6	3084.6	185600	2512.21		67.6758						6000						285.18	0.919935	217.022	11283.2	6
Boadi & Wittenberg (2002)	Can J Anim Sci	Domestic cattle	Bos taurus	Ruminant	Foregut	Cattletype_1	2	Legume/grass	SF6	Restricted intake					310	6400	6.4	86.6281	8.6	91.4	17.9		41.8	31.8		18400	5849.6	2675.2	2035.2	117500	1590.44		66.6712						3900						224.6	0.724516	170.921	8886.36	7.6
Boadi & Wittenberg (2002)	Can J Anim Sci	Domestic cattle	Bos taurus	Ruminant	Foregut	Cattletype_1	2	Medium grass	SF6	Restricted intake					310	6100	6.1	82.5674	9.2	90.8	12.1		58.1	38.7		18100	5538.8	3544.1	2360.7	107800	1459.14		55.9688						3100						193.3	0.623548	147.101	7647.96	7.1
Boadi & Wittenberg (2002)	Can J Anim Sci	Domestic cattle	Bos taurus	Ruminant	Foregut	Cattletype_1	2	Medium grass	SF6	Ad lib intake					310	8900	8.9	120.467	9.2	90.8	12.1		58.1	38.7		18100	8081.2	5170.9	3444.3	159300	2156.23		55.6848						4500						289.8	0.934839	220.538	11466	7.1
Boadi & Wittenberg (2002)	Can J Anim Sci	Domestic cattle	Bos taurus	Ruminant	Foregut	Cattletype_1	2	Low grass	SF6	Restricted intake					310	6100	6.1	82.5674	9.2	90.8	11.1		68.8	43.2		18100	5538.8	4196.8	2635.2	107800	1459.14		43.3307						2400						195.6	0.630968	148.852	7738.96	7.1
Boadi & Wittenberg (2002)	Can J Anim Sci	Domestic cattle	Bos taurus	Ruminant	Foregut	Cattletype_1	2	Low grass	SF6	Ad lib intake					310	6300	6.3	85.2745	9.2	90.8	11.1		68.8	43.2		18100	5720.4	4334.4	2721.6	116200	1572.84		41.9551						2400						203.5	0.656452	154.864	8051.53	6.9
Cammell et al. (1986)	Br J Nutr	Domestic cattle	Bos taurus	Ruminant	Foregut	Cattletype_1	2	White clover	Respiration chamber	Mid season				10	217	4489.36	4.48936	79.4035	9.45	90.55						18800	4065.12			84400	1492.79		78.2667				73.7		3181.63				62202.8	1100.18					6.21
Cammell et al. (1986)	Br J Nutr	Domestic cattle	Bos taurus	Ruminant	Foregut	Cattletype_1	2	Ryegrass	Respiration chamber	Mid season				10	229	4755.56	4.75556	80.7839	9.68	90.32						18000	4295.22			85600	1454.11		80.7667				76.0333		3469.1				65084.5	1105.61					6.42
Cammell et al. (1986)	Br J Nutr	Domestic cattle	Bos taurus	Ruminant	Foregut	Cattletype_1	2	Ryegrass	Respiration chamber	Late season				10	258	5387.1	5.3871	83.6835	9.72	90.28						18600	4863.47			100200	1556.51		80				75.6667		3890.78				75818	1177.76					6.15
Cammell et al. (1986)	Br J Nutr	Domestic cattle	Bos taurus	Ruminant	Foregut	Cattletype_1	2	White clover	Respiration chamber	Late season				10	249	5319.37	5.31937	84.8615	0.19	99.81						19100	5309.26			101600	1620.86		79.3333				75.8333		4212.02				77046.7	1229.15					6.48
Chung et al. (2013)	J Anim Sci	Domestic cattle	Bos taurus	Ruminant	Foregut	Cattletype_1	2	Fresh sainfoin	Respiration chamber	early				4	594	3300	3.3	27.4267	9	91	23.6		22.4	20.4		17500.8	3003	739.2	673.2	57752.7	479.99	79.3	81.6	78	45.3	49.6		2616.9	2450.45	334.858	333.907	2.78305			125.698	0.211613	90	4973.29	9.1
Chung et al. (2013)	J Anim Sci	Domestic cattle	Bos taurus	Ruminant	Foregut	Cattletype_1	2	Fresh alfalfa	Respiration chamber	early				4	596	3600	3.6	29.8447	11.5	88.5	24.1		32.2	26.8		16705.3	3186	1159.2	964.8	60139.2	498.566	75.2	77.4	84.1	55.3	56		2707.2	2465.96	641.038	540.288	5.31433			132.682	0.22262	95	5249.58	8.6
Chung et al. (2013)	J Anim Sci	Domestic cattle	Bos taurus	Ruminant	Foregut	Cattletype_1	2	Alfalfa hay	Respiration chamber					4	616	5100	5.1	41.2463	9.7	90.3	18.5		53.7	42.8		17584.6	4605.3	2738.7	2182.8	89681.3	725.297	52.3	50.3	68.8	38.9	35.4		2667.3	2316.47	1065.35	772.711	8.61606			157.821	0.256203	113	6244.24	7.1
Chung et al. (2013)	J Anim Sci	Domestic cattle	Bos taurus	Ruminant	Foregut	Cattletype_1	2	Fresh sainfoin	Respiration chamber	late				4	601	4800	4.8	39.5444	7.1	92.9	15		45.6	39.2		16747.2	4459.2	2188.8	1881.6	80386.6	662.259	67.1	67.8	68.4	47.9	48.9		3220.8	3023.34	1048.44	920.102	8.63745			157.821	0.262598	113	6244.24	8
Chung et al. (2013)	J Anim Sci	Domestic cattle	Bos taurus	Ruminant	Foregut	Cattletype_1	2	Sainfoin hay	Respiration chamber					4	611	5100	5.1	41.4992	8.6	91.4	17.9		42.1	36.9		17668.3	4661.4	2147.1	1881.9	90108.3	733.219	62.7	60.5	64.2	35	33.1		3197.7	2820.15	751.485	622.909	6.1149			166.201	0.272015	119	6575.79	7.1
Chung et al. (2013)	J Anim Sci	Domestic cattle	Bos taurus	Ruminant	Foregut	Cattletype_1	2	Fresh alfalfa	Respiration chamber	late				4	605	4900	4.9	40.1679	9	91	18		47.1	38.9		16956.5	4459	2307.9	1906.1	83087	681.109	63.8	64.4	70.1	48.9	48.9		3126.2	2871.6	1128.56	932.083	9.25144			167.598	0.277021	120	6631.05	8.2
Demarchi et al. (2003)	Proc Mitigation Conf	Domestic cattle	Bos taurus	Ruminant	Foregut	Cattletype_1	2	Pasture	SF6	Winter				16	317.6	6518.05	6.51805	86.6378	6.21	93.79	3.33		82.1	51.38			6113.28	5351.32	3348.98																142.877	0.449865	102.3	5652.97
Demarchi et al. (2003)	Proc Mitigation Conf	Domestic cattle	Bos taurus	Ruminant	Foregut	Cattletype_1	2	Pasture	SF6	Spring				16	332.7	6376.28	6.37628	81.8518	8.13	91.87	7.72		71.43	41.23			5857.89	4554.58	2628.94																190.642	0.573016	136.5	7542.82
DeRamus et al. (2003)	J Environ Qual	Domestic cattle	Bos taurus	Ruminant	Foregut	Cattletype_1	2	Bahiagrass BMP	SF6						295																														120.112	0.407158	86	4752.25
DeRamus et al. (2003)	J Environ Qual	Domestic cattle	Bos taurus	Ruminant	Foregut	Cattletype_1	2	Bahiagrass continuous	SF6						303																														131.285	0.433284	94	5194.32
DeRamus et al. (2003)	J Environ Qual	Domestic cattle	Bos taurus	Ruminant	Foregut	Cattletype_1	2	Bahiagrass BMP	SF6						379																														159.218	0.4201	114	6299.5
DeRamus et al. (2003)	J Environ Qual	Domestic cattle	Bos taurus	Ruminant	Foregut	Cattletype_1	2	Bahiagrass BMP	SF6						582																														167.598	0.287969	120	6631.05
DeRamus et al. (2003)	J Environ Qual	Domestic cattle	Bos taurus	Ruminant	Foregut	Cattletype_1	2	Bahiagrass BMP	SF6						311																														173.184	0.556863	124	6852.08
DeRamus et al. (2003)	J Environ Qual	Domestic cattle	Bos taurus	Ruminant	Foregut	Cattletype_1	2	Bermudagrass BMP	SF6						323																														180.168	0.557794	129	7128.38
DeRamus et al. (2003)	J Environ Qual	Domestic cattle	Bos taurus	Ruminant	Foregut	Cattletype_1	2	Bahiagrass continuous	SF6						310																														182.961	0.590196	131	7238.9
DeRamus et al. (2003)	J Environ Qual	Domestic cattle	Bos taurus	Ruminant	Foregut	Cattletype_1	2	Bermudagrass continuous	SF6						327																														192.737	0.589411	138	7625.71
DeRamus et al. (2003)	J Environ Qual	Domestic cattle	Bos taurus	Ruminant	Foregut	Cattletype_1	2	Bermudagrass BMP	SF6						368																														199.721	0.542719	143	7902
DeRamus et al. (2003)	J Environ Qual	Domestic cattle	Bos taurus	Ruminant	Foregut	Cattletype_1	2	Bermudagrass BMP	SF6						482																														219.274	0.454925	157	8675.62
DeRamus et al. (2003)	J Environ Qual	Domestic cattle	Bos taurus	Ruminant	Foregut	Cattletype_1	2	Bermudagrass BMP	SF6						343																														223.464	0.651498	160	8841.4
DeRamus et al. (2003)	J Environ Qual	Domestic cattle	Bos taurus	Ruminant	Foregut	Cattletype_1	2	Bahiagrass continuous	SF6						400																														231.844	0.579609	166	9172.95
DeRamus et al. (2003)	J Environ Qual	Domestic cattle	Bos taurus	Ruminant	Foregut	Cattletype_1	2	Bermudagrass continuous	SF6						341																														231.844	0.679893	166	9172.95
DeRamus et al. (2003)	J Environ Qual	Domestic cattle	Bos taurus	Ruminant	Foregut	Cattletype_1	2	Bahiagrass continuous	SF6						586																														243.017	0.414704	174	9615.02
DeRamus et al. (2003)	J Environ Qual	Domestic cattle	Bos taurus	Ruminant	Foregut	Cattletype_1	2	Bermudagrass BMP	SF6						600																														250	0.416667	179	9891.32
DeRamus et al. (2003)	J Environ Qual	Domestic cattle	Bos taurus	Ruminant	Foregut	Cattletype_1	2	Bahiagrass BMP	SF6						572																														252.793	0.441946	181	10001.8
DeRamus et al. (2003)	J Environ Qual	Domestic cattle	Bos taurus	Ruminant	Foregut	Cattletype_1	2	Bermudagrass continuous	SF6						470																														263.966	0.561631	189	10443.9
DeRamus et al. (2003)	J Environ Qual	Domestic cattle	Bos taurus	Ruminant	Foregut	Cattletype_1	2	Bermudagrass continuous	SF6						390																														269.553	0.691162	193	10664.9
DeRamus et al. (2003)	J Environ Qual	Domestic cattle	Bos taurus	Ruminant	Foregut	Cattletype_1	2	Bahiagrass continuous	SF6						573																														303.073	0.528923	217	11991.1
DeRamus et al. (2003)	J Environ Qual	Domestic cattle	Bos taurus	Ruminant	Foregut	Cattletype_1	2	Bermudagrass BMP	SF6						551																														305.866	0.555111	219	12101.7
DeRamus et al. (2003)	J Environ Qual	Domestic cattle	Bos taurus	Ruminant	Foregut	Cattletype_1	2	Bahiagrass hay	SF6						523																														308.659	0.590171	221	12212.2
DeRamus et al. (2003)	J Environ Qual	Domestic cattle	Bos taurus	Ruminant	Foregut	Cattletype_1	2	Bahiagrass BMP	SF6						595																														311.453	0.52345	223	12322.7
DeRamus et al. (2003)	J Environ Qual	Domestic cattle	Bos taurus	Ruminant	Foregut	Cattletype_1	2	Bermudagrass BMP	SF6						621																														314.246	0.506032	225	12433.2
DeRamus et al. (2003)	J Environ Qual	Domestic cattle	Bos taurus	Ruminant	Foregut	Cattletype_1	2	Bermudagrass continuous	SF6						614																														315.642	0.514076	226	12488.5
DeRamus et al. (2003)	J Environ Qual	Domestic cattle	Bos taurus	Ruminant	Foregut	Cattletype_1	2	Bahiagrass hay	SF6						400																														318.436	0.796089	228	12599
DeRamus et al. (2003)	J Environ Qual	Domestic cattle	Bos taurus	Ruminant	Foregut	Cattletype_1	2	Bahiagrass continuous	SF6						601																														347.765	0.578645	249	13759.4
DeRamus et al. (2003)	J Environ Qual	Domestic cattle	Bos taurus	Ruminant	Foregut	Cattletype_1	2	Bermudagrass continuous	SF6						631																														347.765	0.551134	249	13759.4
DeRamus et al. (2003)	J Environ Qual	Domestic cattle	Bos taurus	Ruminant	Foregut	Cattletype_1	2	Bermudagrass continuous	SF6						560																														356.145	0.635974	255	14091
Fitzsimons et al. (2013)	J Anim Sci	Domestic cattle	Bos taurus	Ruminant	Foregut	Cattletype_1	2	Grass silage	SF6	High RFI				7	479.157	8250	8.25	80.5556	8.2	91.8	13.5		46.3			16520	7573.5	3819.75		136290	1330.78	73						6022.5							414.804	0.865696	297	16411.8	12.0419
Fitzsimons et al. (2013)	J Anim Sci	Domestic cattle	Bos taurus	Ruminant	Foregut	Cattletype_1	2	Grass silage	SF6	Medium RFI				8	475.655	7638.89	7.63889	75	8.2	91.8	13.5		46.3			16520	7012.5	3536.81		126194	1239	72						5500							384.078	0.807473	275	15196.2	12.0419
Fitzsimons et al. (2013)	J Anim Sci	Domestic cattle	Bos taurus	Ruminant	Foregut	Cattletype_1	2	Grass silage	SF6	Low RFI				7	489.078	6842.11	6.84211	65.7895	8.2	91.8	13.5		46.3			16520	6281.05	3167.89		113032	1086.84	73						4994.74							363.128	0.742476	260	14367.3	12.7108
Fraser et al. (2014)	PLoS One	Domestic cattle	Bos taurus	Ruminant	Foregut	Cattletype_1	2	Grass pastures	SF6	upland	Welsh Black			9	410	7700	7.7	84.509	3.3	96.7	12		67.7	36.3		18700	7445.9	5212.9	2795.1	143990	1580.32														241.62	0.589317	173	9559.76	6.8
Fraser et al. (2014)	PLoS One	Domestic cattle	Bos taurus	Ruminant	Foregut	Cattletype_1	2	Grass pastures	SF6	upland	Limousin			9	467	8200	8.2	81.6256	3.3	96.7	12		67.7	36.3		18700	7929.4	5551.4	2976.6	153340	1526.4														265.363	0.568229	190	10499.2	7
Fraser et al. (2014)	PLoS One	Domestic cattle	Bos taurus	Ruminant	Foregut	Cattletype_1	2	Grass pastures	SF6	lowland	Welsh Black			9	386	10300	10.3	118.276	11.9	88.1	14.8		50.8	28.3		17500	9074.3	5232.4	2914.9	180250	2069.83														301.676	0.781544	216	11935.9	6.7
Fraser et al. (2014)	PLoS One	Domestic cattle	Bos taurus	Ruminant	Foregut	Cattletype_1	2	Grass pastures	SF6	lowland	Limousin			9	458	11800	11.8	119.188	11.9	88.1	14.8		50.8	28.3		17500	10395.8	5994.4	3339.4	206500	2085.79														303.073	0.661731	217	11991.1	6
Grandl et al. (2016ab, 2018)	J Dairy Sci / J Anim Physiol Anim Nutr	Domestic cattle	Bos taurus	Ruminant	Foregut	Cattletype_1	2	Grass hay	Respiration chamber	JT12	Bernadetta			1	420	9035.06	9.03506	97.3855	9.4	90.6	12.3		53.8	32.7	4.22	17846	8356.9	5037.18	2954.47	161240	1737.94	67.8275	70.3398		63.1194	61.8678	81.4367	6128.26	5878.23	3179.44	1827.86	34.2699	131308	1415.32	287	0.683333	206.28	11355.2	7.0312
Grandl et al. (2016ab, 2018)	J Dairy Sci / J Anim Physiol Anim Nutr	Domestic cattle	Bos taurus	Ruminant	Foregut	Cattletype_1	2	Grass hay	Respiration chamber	JT07	Belinda			1	465	9371.38	9.37138	93.5867	9.4	90.6	12.3		53.8	32.7	4.22	17845.8	8667.98	5224.69	3064.44	167240	1670.13	70.2841	72.7209		66.7835	65.2315	83.5087	6586.6	6303.44	3489.23	1998.98	34.8449	139660	1394.7	293	0.630108	210.96	11592.6	6.93266
Grandl et al. (2016ab, 2018)	J Dairy Sci / J Anim Physiol Anim Nutr	Domestic cattle	Bos taurus	Ruminant	Foregut	Cattletype_1	2	Grass hay	Respiration chamber	JT02	Belona			1	339	6670.51	6.67051	84.4325	9.4	90.6	12.3		53.8	32.7	4.22	17811.2	5973.89	3550.19	2181.26	118810	1503.85	56.6681	60.933		57.8595	52.7696	79.6236	3780.05	3640.07	2054.12	1151.04	26.0002	94600.8	1197.42	157	0.463127	112.68	6211.75	5.21241
Grandl et al. (2016ab, 2018)	J Dairy Sci / J Anim Physiol Anim Nutr	Domestic cattle	Bos taurus	Ruminant	Foregut	Cattletype_1	2	Grass hay	Respiration chamber	JT10	Aleika			1	514	9749.27	9.74927	90.3129	9.4	90.6	12.3		53.8	32.7	4.22	17845.4	9017.5	5435.36	3188.01	173980	1611.67	62.8666	65.4895		57.3295	55.7221	79.7006	6129.04	5905.52	3116.07	1776.43	28.8658	138663	1284.51	339	0.659533	244.08	13412.6	7.71017
Grandl et al. (2016ab, 2018)	J Dairy Sci / J Anim Physiol Anim Nutr	Domestic cattle	Bos taurus	Ruminant	Foregut	Cattletype_1	2	Grass hay	Respiration chamber	JT11	Arena			1	493	8799.95	8.79995	84.1095	9.4	90.6	12.3		53.8	32.7	4.22	17845.6	8139.43	4906.1	2877.58	157040	1500.98	65.0295	67.8629		59.9942	58.3595	80.7572	5722.56	5523.66	2943.38	1679.34	28.1327	126821	1212.15	282	0.572008	202.68	11157.4	7.09307
Grandl et al. (2016ab, 2018)	J Dairy Sci / J Anim Physiol Anim Nutr	Domestic cattle	Bos taurus	Ruminant	Foregut	Cattletype_1	2	Grass hay	Respiration chamber	JT01	Brunetta			1	262.8	6180.45	6.18045	94.6894	9.4	90.6	12.3		53.8	32.7	4.22	17811	5535.01	3289.37	2021.01	110080	1686.51	61.2344	65.1321		62.7669	59.614	78.0611	3784.57	3605.07	2064.64	1204.8	31.6318	85929.7	1316.51	130	0.494673	93.24	5143.48	4.65514
Grandl et al. (2016ab, 2018)	J Dairy Sci / J Anim Physiol Anim Nutr	Domestic cattle	Bos taurus	Ruminant	Foregut	Cattletype_1	2	Grass hay	Respiration chamber	JT03	Baronin			1	361.8	5674.44	5.67444	68.4025	9.4	90.6	12.3		53.8	32.7	4.22	17811.4	5081.85	3020.06	1855.54	101070	1218.35	49.1115	53.9721		50.5256	46.0695	71.3433	2786.81	2742.78	1525.9	854.839	18.394	72106.6	869.208	173	0.478165	124.56	6844.79	6.77339
Grandl et al. (2016ab, 2018)	J Dairy Sci / J Anim Physiol Anim Nutr	Domestic cattle	Bos taurus	Ruminant	Foregut	Cattletype_1	2	Grass hay	Respiration chamber	JT05	Barbie			1	308.9	7485.72	7.48572	101.595	9.4	90.6	12.3		53.8	32.7	4.22	17835.3	6698.95	3954.04	2447.83	133510	1811.97	69.8577	72.2967		70.023	67.221	82.7192	5229.36	4843.12	2768.73	1645.46	37.5766	110438	1498.85	251	0.812561	180.72	9930.88	7.43916
Grandl et al. (2016ab, 2018)	J Dairy Sci / J Anim Physiol Anim Nutr	Domestic cattle	Bos taurus	Ruminant	Foregut	Cattletype_1	2	Grass hay	Respiration chamber	JT09	Brenda			1	463	9849.05	9.84905	98.6754	9.4	90.6	12.3		53.8	32.7	4.22	17845.4	9109.79	5490.99	3220.64	175760	1760.9	67.1752	70.1714		63.3086	61.0989	81.4599	6616.13	6392.47	3476.27	1967.77	34.8279	143174	1434.43	301	0.650108	219.6	11909.1	6.8666
Grandl et al. (2016ab, 2018)	J Dairy Sci / J Anim Physiol Anim Nutr	Domestic cattle	Bos taurus	Ruminant	Foregut	Cattletype_1	2	Grass hay	Respiration chamber	JT04	Bora			1	257.8	6214.48	6.21448	96.5923	9.4	90.6	12.3		53.8	32.7	4.22	17835.8	5561.32	3282.55	2032.14	110840	1722.8	71.5927	73.7306		73.483	69.1911	83.1047	4449.12	4100.4	2412.12	1406.06	37.4918	92113.3	1431.73	144	0.558573	103.32	5697.4	5.12308
Grandl et al. (2016ab, 2018)	J Dairy Sci / J Anim Physiol Anim Nutr	Domestic cattle	Bos taurus	Ruminant	Foregut	Cattletype_1	2	Grass hay	Respiration chamber	JT06	Bernina			1	368	7814.76	7.81476	93.01	9.4	90.6	12.3		53.8	32.7	4.22	17835.5	6993.4	4127.84	2555.43	139380	1658.88	67.3633	69.9987		68.1172	65.8989	81.7237	5264.28	4895.29	2811.76	1684	33.4652	113907	1355.7	274	0.744565	197.28	10840.9	7.77892
Grandl et al. (2016ab, 2018)	J Dairy Sci / J Anim Physiol Anim Nutr	Domestic cattle	Bos taurus	Ruminant	Foregut	Cattletype_1	2	Grass hay	Respiration chamber	JT08	Aurora			1	565	9730.85	9.73085	83.9681	9.4	90.6	12.3		53.8	32.7	4.22	17845.3	9000.46	5425.09	3181.99	173650	1498.44	67.3128	70.7345		63.4077	61.8824	82.0679	6550.1	6366.43	3439.93	1969.09	29.6833	142511	1229.74	355	0.628319	255.6	14045.7	8.08936
Hart et al. (2009)	J Anim Sci	Domestic cattle	Bos taurus	Ruminant	Foregut	Cattletype_1	2	Pasture sward high	SF6					6	470	7660	7.66	75.8849	7.2	92.8	10.2		61.6	34	5	18200	7108.48	4718.56	2604.4	139412	1381.11	87.859	83	74.8	81	78.1		6730	5900.04	3822.03	2034.04	37.8635			269.553	0.573517	193	10664.9	9.9
Hart et al. (2009)	J Anim Sci	Domestic cattle	Bos taurus	Ruminant	Foregut	Cattletype_1	2	Pasture sward low	SF6					6	470	5380	5.38	53.2978	6	94	5.9		67.1	39.2	6	18300	5057.2	3609.98	2108.96	98454	975.349	79.9257	71.5	56.9	68.2	66.7		4300	3615.9	2462.01	1406.68	24.3902			192.737	0.41008	138	7625.71	9.8
Hindrichsen et al. (2006)	Agric Ecosys Environ	Domestic cattle	Bos taurus	Ruminant	Foregut	Cattletype_1	2	Grass hay and silage	Respiration chamber	HG 10				5	611	13500	13.5	109.851	9.7	90.3	12.6	30.4	56.4	35.2	5.2	18500	12190.5	7614	4752	249750	2032.24		70		69	69	66.9		8533.35	5253.66	3278.88	42.7495	167083	1359.57	451.117	0.738326	323	17900	7.14
Hironaka et al. (1996)	Sci Total Environ	Domestic cattle	Bos taurus	Ruminant	Foregut	Cattletype_1	2	Lucerne hay	Respiration chamber	Second cut pelleted	1.0 Maintenance			4	265	3638.68	3.63868	55.4			19.3					18677.7				67962.2	1034.74	58.8		75.1			60.5	2139.55					41117.1	626.02	106.25	0.400942	80.8559	4203.79	6.18549
Hironaka et al. (1996)	Sci Total Environ	Domestic cattle	Bos taurus	Ruminant	Foregut	Cattletype_1	2	Lucerne hay	Respiration chamber	Second cut chopped	1.0 Maintenance			5	272	3857.88	3.85788	57.6			19					18487.4				71322.2	1064.87	58.7		70.8			59.5	2264.58					42436.7	633.6	128.468	0.472307	97.7638	5082.85	7.1266
Hironaka et al. (1996)	Sci Total Environ	Domestic cattle	Bos taurus	Ruminant	Foregut	Cattletype_1	2	Lucerne hay	Respiration chamber	First cut pelleted	1.0 Maintenance			5	313	4256.52	4.25652	57.2			17.5					18443.3				78504.3	1054.96	58.8		69.9			59.1	2502.83					46396	623.48	119.608	0.382135	91.0218	4732.33	6.02811
Hironaka et al. (1996)	Sci Total Environ	Domestic cattle	Bos taurus	Ruminant	Foregut	Cattletype_1	2	Lucerne hay	Respiration chamber	First cut chopped	1.0 Maintenance			4	302	4129.33	4.12933	57			19.1					18135.6				74887.9	1033.73	60.3		70.4			59	2489.99					44183.9	609.9	135.442	0.448484	103.071	5358.8	7.15577
Hironaka et al. (1996)	Sci Total Environ	Domestic cattle	Bos taurus	Ruminant	Foregut	Cattletype_1	2	Lucerne hay	Respiration chamber	Second cut chopped	1.6 Maintenance			5	272	5853.8	5.8538	87.4			19					18394.6				107679	1607.69	59.4		73.2			59.8	3477.16					64391.8	961.4	183.809	0.67577	139.879	7272.47	6.75386
Hironaka et al. (1996)	Sci Total Environ	Domestic cattle	Bos taurus	Ruminant	Foregut	Cattletype_1	2	Lucerne hay	Respiration chamber	Second cut pelleted	1.6 Maintenance			5	265	5904.65	5.90465	89.9			19.3					18675.7				110274	1678.95	58.3		74			58.9	3442.41					64951.1	988.9	189.539	0.715242	144.239	7499.17	6.80051
Hironaka et al. (1996)	Sci Total Environ	Domestic cattle	Bos taurus	Ruminant	Foregut	Cattletype_1	2	Lucerne hay	Respiration chamber	First cut chopped	1.6 Maintenance			5	302	6795.29	6.79529	93.8			19.1					18053.4				122678	1693.41	64.8		75.8			63.7	4403.35					78145.8	1078.7	192.307	0.636777	146.345	7608.67	6.20215
Hironaka et al. (1996)	Sci Total Environ	Domestic cattle	Bos taurus	Ruminant	Foregut	Cattletype_1	2	Lucerne hay	Respiration chamber	First cut pelleted	1.6 Maintenance			5	313	7776.33	7.77633	104.5			17.5					18644.1				144982	1948.31	57.8		67.3			59	4494.72					85539.6	1149.5	183.521	0.58633	139.66	7261.07	5.00824
Kawashima et al. (2006)	J Agric Res Quart	Domestic cattle	Bos taurus	Ruminant	Foregut	Cattletype_1	2	Ruzi grass hay	Face mask					4	336	4206	4.206	53.5938	6.3	93.7	4.8		72	43		18200	3941.02	3028.32	1808.58	76438.7	974						47.8439						36571.3	466	84.8954	0.252665	64.6054	3358.91	4.39425
Kawashima et al. (2007)	J Agric Res Quart	Domestic cattle	Bos taurus	Ruminant	Foregut	Cattletype_1	2	Ruzi grass hay	Face mask	Treatment 1				4	412	5550.88	5.55088	60.7	6.3	93.7	3.4	35.6	73.8	45.5		17500	5201.17	4096.55	2525.65	96934.6	1060	53.2	55.5	35.1	53.8	50	53.3962	2953.07	2886.65	2203.94	1262.82	24.1006	51759.4	566	143.301	0.347819	109.052	5669.76	5.84906
Klevenhusen et al. (2010)	Anim Prod Sci	Domestic cattle	Bos taurus	Ruminant	Foregut	Cattletype_1	2	Ryegrass hay	Respiration chamber					6	649	14000	14	108.879	15.4	84.6	21.1		52.9	25.6		17600	11844	7406	3584	246400	1916.27														486.34	0.749368	348.219	19242.2	7.80932
Kurihara et al. (1999)	Br J Nutr	Domestic cattle	Bos taurus	Ruminant	Foregut	Cattletype_1	2	Angleton grass	Respiration chamber					6	353	3580	3.58	43.9594	12.1	87.9	2.4		75.3	45.8	6.4	16670	3146.82	2695.74	1639.64	59400	729.383	41.3	46.7		54.7	54.6	44.2	1478.54	1469.56	1474.57	895.243	18.1065	26400	324.17	157.821	0.447086	113	6177.6	10.4
Kurihara et al. (1999)	Br J Nutr	Domestic cattle	Bos taurus	Ruminant	Foregut	Cattletype_1	2	Rhodes grass	Respiration chamber					6	364	7070	7.07	84.8386	10.6	89.4	8.9		71.8	35.3	3.8	17470	6320.58	5076.26	2495.71	123900	1486.78	60.3	62.6		68.8	65.8	59.4	4263.21	3956.68	3492.47	1642.18	41.9089	73500	881.985	358.939	0.986095	257	14124.6	11.4
Lassey et al. (1997)	Atmosph Environ	Domestic cattle	Bos taurus	Ruminant	Foregut	Cattletype_1	2	Pasture	SF6	Dairy				10	483	12880	12.88	125.013	10.7	89.3	25.4		41.4	22.2		18400	11501.8	5332.32	2859.36	236992	2300.24														367.039	0.759915	262.8	14522	6.16
McCaughey et al. (1997)	Can J Anim Sci	Domestic cattle	Bos taurus	Ruminant	Foregut	Cattletype_1	2	Afalfa/grass pasture	SF6	Continuous high					380.1	13510	13.51	156.939	9.91858	90.0814						17776.1	12170			240155	2789.77														242.2	0.637201	184.314	9582.71	4.4
McCaughey et al. (1997)	Can J Anim Sci	Domestic cattle	Bos taurus	Ruminant	Foregut	Cattletype_1	2	Afalfa/grass pasture	SF6	Rotation high					391.5	14940	14.94	169.747	11.0442	88.9558						17534.7	13290			261968	2976.46														263.8	0.673819	200.752	10437.3	4.1
McCaughey et al. (1997)	Can J Anim Sci	Domestic cattle	Bos taurus	Ruminant	Foregut	Cattletype_1	2	Afalfa/grass pasture	SF6	Rotation low					417.1	13610	13.61	147.461	8.89052	91.1095						17919.3	12400			243881	2642.4														280.1	0.671542	213.156	11082.2	4.3
McCaughey et al. (1997)	Can J Anim Sci	Domestic cattle	Bos taurus	Ruminant	Foregut	Cattletype_1	2	Afalfa/grass pasture	SF6	Continuous low					402.6	13200	13.2	146.865	8.40909	91.5909						17812.9	12090			235131	2616.1														306.7	0.761798	233.399	12134.7	5.2
McCaughey et al. (1999)	Can J Anim Sci	Domestic cattle	Bos taurus	Ruminant	Foregut	Cattletype_1	2	Alfalfa-grass	SF6						506.2	11400	11.4	106.823	10	90	13.1		58.4	42.8		18212.6	10260	6657.6	4879.2	207623	1945.52														373.8	0.738443	284.462	14789.5	7.1
McCaughey et al. (1999)	Can J Anim Sci	Domestic cattle	Bos taurus	Ruminant	Foregut	Cattletype_1	2	Grass-only	SF6						516.2	9700	9.7	89.5691	10.4	89.6	9		73.1	45.9		18254.4	8691.2	7090.7	4452.3	177068	1635.03														411	0.796203	312.771	16261.3	9.5
McDonnell et al. (2016)	J Anim Sci	Domestic cattle	Bos taurus	Ruminant	Foregut	Cattletype_1	2	Grass silage	SF6					28	346.434	5520	5.52	68.8	6.2	93.8	12.3		66.1	35.2		17900	5177.76	3648.72	1943.04	98808	1230.49	68.1	69.1	57.7	70.1	70.2	65.3	3759.12	3577.83	2557.75	1364.01	31.8525	64521.6	803.507	189.944	0.548283	136	7515.19	7.87
McDonnell et al. (2016)	J Anim Sci	Domestic cattle	Bos taurus	Ruminant	Foregut	Cattletype_1	2	Pasture	SF6					28	384.91	6530	6.53	73.3	6.5	93.5	16		55.2	20.6		18300	6105.55	3604.56	1345.18	119499	1375.13	73.6	75.9	69.4	72	59.8	70.9	4806.08	4634.11	2595.28	804.418	29.8652	84724.8	974.969	167.598	0.43542	120	6631.05	5.62
O'Neill et al. (2011)	J Dairy Sci	Domestic cattle	Bos taurus	Ruminant	Foregut	Cattletype_1	2	Reygrass	SF6					16	478	14280	14.28	139.687	7.65	92.35	21.8		38.75	22.8		17550	13187.6	5533.5	3255.84	250000	2445.51														350.559	0.733386	251	13869.9	5.74
O'Neill et al. (2012)	J Dairy Sci	Domestic cattle	Bos taurus	Ruminant	Foregut	Cattletype_1	2	Ryegrass	SF6	Low grass allowance				16	495	13900	13.9	132.453	7.4	92.6	22.7		41.7	25.2		18000	12871.4	5796.3	3502.8	251000	2391.77														487.43	0.984707	349	19285.3	7.7
O'Neill et al. (2012)	J Dairy Sci	Domestic cattle	Bos taurus	Ruminant	Foregut	Cattletype_1	2	Ryegrass	SF6	High grass allowance				16	511	14900	14.9	138.634	6.9	93.1	22.5		42.6	25.5		18100	13871.9	6347.4	3799.5	271000	2521.47														536.313	1.04954	384	21219.4	7.98
Okine et al. (1989)	J Anim Sci	Domestic cattle	Bos taurus	Ruminant	Foregut	Cattletype_1	2	Bromegrass/alfalfa mixture	Respiration hood	Without weights				4	531	7380	7.38	66.7168	9	91	11.5		57.3	43.6	8.7	17302	6715.8	4228.74	3217.68	127688	1154.33	47.8	52.1	45.4	45.1	40.8	48.5	3527.64	3498.93	1907.16	1312.81	17.2412	61928.9	559.851	188.8	0.355556	143.677	7469.92	5.85012
Ominski et al. (2006)	Can J Anim Sci	Domestic cattle	Bos taurus	Ruminant	Foregut	Cattletype_1	2	Grass pastures	SF6	Summer 1	Period 1			36	322.973	4780	4.78	62.7413	5.2	94.8	5.2		60.8	36.1		18100	4531.44	2906.24	1725.58	86518	1135.62														156.4	0.484251	119.02	6188.01	7.1
Ominski et al. (2006)	Can J Anim Sci	Domestic cattle	Bos taurus	Ruminant	Foregut	Cattletype_1	2	Alfalfa-grass silage	SF6	Winter 1	Diet 1			36	292.15	6800	6.8	96.2287	9	91	13.6		60.8	46.4		18600	6188	4134.4	3155.2	126480	1789.85														178.7	0.611672	135.991	7070.31	5.8
Ominski et al. (2006)	Can J Anim Sci	Domestic cattle	Bos taurus	Ruminant	Foregut	Cattletype_1	2	Alfalfa-grass silage	SF6	Winter 3	Diet 3			36	300.9	9100	9.1	125.958	14.2	85.8	16.7		51.2	38.2		17600	7807.8	4659.2	3476.2	160160	2216.86														185.1	0.615155	140.861	7323.53	5.1
Ominski et al. (2006)	Can J Anim Sci	Domestic cattle	Bos taurus	Ruminant	Foregut	Cattletype_1	2	Alfalfa-grass silage	SF6	Winter 4	Diet 4			36	301.65	8700	8.7	120.196	10.7	89.3	16.5		46.4	35.6		18200	7769.1	4036.8	3097.2	158340	2187.58														194.7	0.64545	148.167	7703.36	5.1
Ominski et al. (2006)	Can J Anim Sci	Domestic cattle	Bos taurus	Ruminant	Foregut	Cattletype_1	2	Grass pastures	SF6	Summer 2	Period 1			36	375.188	4990	4.99	58.5348	6.8	93.2	8.4		68.8	38.4		18200	4650.68	3433.12	1916.16	90818	1065.33														195.8	0.521872	149.004	7746.88	9.4
Ominski et al. (2006)	Can J Anim Sci	Domestic cattle	Bos taurus	Ruminant	Foregut	Cattletype_1	2	Grass pastures	SF6	Summer 2	Perdiod 2			36	361.081	6680	6.68	80.6442	9.8	90.2	19.3		61.6	32.2		18200	6025.36	4114.88	2150.96	121576	1467.72														200.6	0.555554	152.657	7936.79	6.9
Ominski et al. (2006)	Can J Anim Sci	Domestic cattle	Bos taurus	Ruminant	Foregut	Cattletype_1	2	Alfalfa-grass silage	SF6	Winter 2	Diet 2			36	302.35	8200	8.2	113.092	9.6	90.4	16.6		53.2	40		18700	7412.8	4362.4	3280	153340	2114.82														214.6	0.709773	163.311	8490.7	5.9
Ominski et al. (2006)	Can J Anim Sci	Domestic cattle	Bos taurus	Ruminant	Foregut	Cattletype_1	2	Grass pastures	SF6	Summer 1	Perdiod 2			36	338.667	5080	5.08	64.3479	6.8	93.2	7.8		66	38.5		18100	4734.56	3352.8	1955.8	91948	1164.7														237.3	0.700689	180.585	9388.84	11.3
Pelve et al. (2012)	Livestock Sci	Domestic cattle	Bos taurus	Ruminant	Foregut	Cattletype_1	2	Forage WET	SF6	cow				6	590.85	9040	9.04	75.4329	5.3	94.7	11.8		60				8560.88	5424				58	60	60	63			5243.2	5136.53	3417.12		28.5136			331.006	0.56022	237	13096.3
Pelve et al. (2012)	Livestock Sci	Domestic cattle	Bos taurus	Ruminant	Foregut	Cattletype_1	2	Forage NL	SF6	cow				6	572.667	8590	8.59	73.3781	8.7	91.3	7.6		59.7				7842.67	5128.23				60	61	53	64			5154	4784.03	3282.07		28.0363			349.162	0.609712	250	13814.7
Pelve et al. (2012)	Livestock Sci	Domestic cattle	Bos taurus	Ruminant	Foregut	Cattletype_1	2	Forage SNL	SF6	cow				6	580.645	9000	9	76.0868	8.1	91.9	8		56.6				8271	5094				61	62	54	63			5490	5128.02	3209.22		27.131			365.922	0.630199	262	14477.8
Pinares-Patino et al. (2003)	Can J Anim Sci	Domestic cattle	Bos taurus	Ruminant	Foregut	Cattletype_1	2	Timothy grass	SF6	Vegetative				6	723	9743.04	9.74304	69.8781	6.6	93.4	31.4		52.6	24.9		19800	9100	5124.84	2426.02	192000	1377.04				77.4					3966.63		28.449			285.475	0.394848	204.4	11294.9	5.88275
Pinares-Patino et al. (2003)	Can J Anim Sci	Domestic cattle	Bos taurus	Ruminant	Foregut	Cattletype_1	2	Timothy grass	SF6	Flowering				6	770	10575.9	10.5759	72.3519	4.5	95.5	7.8		68.4	40.3		19100	10100	7233.93	4262.09	203000	1388.76				61.6					4456.1		30.485			324.302	0.421171	232.2	12831.1	6.32073
Pinares-Patino et al. (2003)	Can J Anim Sci	Domestic cattle	Bos taurus	Ruminant	Foregut	Cattletype_1	2	Timothy grass	SF6	Heading				6	761	12034.1	12.0341	83.0566	6.1	93.9	13.2		59.8	32.3		18900	11300	7196.38	3887.01	228000	1573.61				72.3					5202.98		35.9099			381.704	0.501582	273.3	15102.2	6.62378
Pinares-Patino et al. (2003)	Can J Anim Sci	Domestic cattle	Bos taurus	Ruminant	Foregut	Cattletype_1	2	Timothy grass	SF6	Senescent				6	800	10352	10.352	68.8185	3.4	96.6	4.4		75.4	45.3		18800	10000	7805.38	4689.44	195000	1296.33				55.6					4339.79		28.8504			318.994	0.398743	228.4	12621.1	6.47236
Pinares-Patino et al. (2007)	Agric Ecosys Environ	Domestic cattle	Bos taurus	Ruminant	Foregut	Cattletype_1	2	Grassland	SF6	2003 P1	HSR			7	452.8												7400	4300		135537	1380.8		76.3		74				5646.2	3182		32.4168			246.648	0.544717	176.6	9758.69	7.2
Pinares-Patino et al. (2007)	Agric Ecosys Environ	Domestic cattle	Bos taurus	Ruminant	Foregut	Cattletype_1	2	Grassland	SF6	2003 P3	HSR			7	511.6												11600	8800		216656	2014.06		63.4		64.7				7354.4	5693.6		52.9284			290.223	0.567286	207.8	11482.8	5.3
Pinares-Patino et al. (2007)	Agric Ecosys Environ	Domestic cattle	Bos taurus	Ruminant	Foregut	Cattletype_1	2	Grassland	SF6	2002 P2	LSR			7	480.1												8500	5600		170355	1660.95		64.9		58.9				5516.5	3298.4		32.1591			301.397	0.627779	215.8	11924.8	7
Pinares-Patino et al. (2007)	Agric Ecosys Environ	Domestic cattle	Bos taurus	Ruminant	Foregut	Cattletype_1	2	Grassland	SF6	2003 P4	HSR			7	536.2												13200	9400		256246	2299.65		67.9		66.8				8962.8	6279.2		56.352			278.492	0.51938	199.4	11018.6	4.3
Pinares-Patino et al. (2007)	Agric Ecosys Environ	Domestic cattle	Bos taurus	Ruminant	Foregut	Cattletype_1	2	Grassland	SF6	2003 P1	LSR			7	449.5												6100	3500		119875	1227.95		77.1		75.1				4703.1	2628.5		26.9253			227.235	0.505528	162.7	8990.6	7.5
Pinares-Patino et al. (2007)	Agric Ecosys Environ	Domestic cattle	Bos taurus	Ruminant	Foregut	Cattletype_1	2	Grassland	SF6	2003 P3	LSR			7	499.2												9800	6900		189930	1798.4		59.6		56.5				5840.8	3898.5		36.914			297.626	0.596205	213.1	11775.6	6.2
Pinares-Patino et al. (2007)	Agric Ecosys Environ	Domestic cattle	Bos taurus	Ruminant	Foregut	Cattletype_1	2	Grassland	SF6	2002 P1	LSR			7	457.3												9600	6300		190175	1923.1		76.1		74.3				7305.6	4680.9		47.3346			312.43	0.683206	223.7	12361.4	6.5
Pinares-Patino et al. (2007)	Agric Ecosys Environ	Domestic cattle	Bos taurus	Ruminant	Foregut	Cattletype_1	2	Grassland	SF6	2002 P3	LSR			7	507.5												6900	4500		143035	1337.72		63.9		58.5				4409.1	2632.5		24.6202			281.983	0.555632	201.9	11156.7	7.8
Pinares-Patino et al. (2007)	Agric Ecosys Environ	Domestic cattle	Bos taurus	Ruminant	Foregut	Cattletype_1	2	Grassland	SF6	2002 P1	HSR			7	453.3												7700	5400		155968	1587.62		73.7		71.6				5674.9	3866.4		39.3566			315.363	0.695705	225.8	12477.4	8
Pinares-Patino et al. (2007)	Agric Ecosys Environ	Domestic cattle	Bos taurus	Ruminant	Foregut	Cattletype_1	2	Grassland	SF6	2003 P4	LSR			7	524.2												10500	6500		201037	1835.07		59.8		50.8				6279	3302		30.1408			320.112	0.610667	229.2	12665.3	6.3
Pinares-Patino et al. (2007)	Agric Ecosys Environ	Domestic cattle	Bos taurus	Ruminant	Foregut	Cattletype_1	2	Grassland	SF6	2003 P2	HSR			7	482.6												8400	6000		156688	1521.75		67.1		66.4				5636.4	3984		38.6927			300.978	0.623659	215.5	11908.3	7.6
Pinares-Patino et al. (2007)	Agric Ecosys Environ	Domestic cattle	Bos taurus	Ruminant	Foregut	Cattletype_1	2	Grassland	SF6	2002 P3	HSR			7	518.2												8300	5300		178641	1644.78		73.6		70.8				6108.8	3752.4		34.549			288.966	0.557635	206.9	11433	6.4
Pinares-Patino et al. (2007)	Agric Ecosys Environ	Domestic cattle	Bos taurus	Ruminant	Foregut	Cattletype_1	2	Grassland	SF6	2003 P2	LSR			7	475.3												8500	6000		144018	1414.79		63.5		61.2				5397.5	3672		36.0725			291.201	0.612668	208.5	11521.4	8
Pinares-Patino et al. (2007)	Agric Ecosys Environ	Domestic cattle	Bos taurus	Ruminant	Foregut	Cattletype_1	2	Grassland	SF6	2002 P2	HSR			7	498.1												11200	7100		235076	2229.57		75.8		72.8				8489.6	5168.8		49.0233			362.43	0.727625	259.5	14339.6	6.1
Pinares-Patino et al. (2007)	Agric Ecosys Environ	Domestic cattle	Bos taurus	Ruminant	Foregut	Cattletype_1	2	Grassland	SF6	2002 P4	LSR			7	537.6												10200	6000		213554	1912.77		66.2		59.2				6752.4	3552		31.8147			350.838	0.6526	251.2	13881	6.5
Pinares-Patino et al. (2007)	Agric Ecosys Environ	Domestic cattle	Bos taurus	Ruminant	Foregut	Cattletype_1	2	Grassland	SF6	2002 P4	HSR			7	551.6												10800	6700		230496	2025.09		73		69.3				7884	4643.1		40.7934			384.497	0.697058	275.3	15212.7	6.6
Pinares-Patino et al. (2008)	Austr J Exp Agric	Domestic cattle	Bos taurus	Ruminant	Foregut	Cattletype_1	2	Pasture	SF6	high bloat	P1			12	341.3	5220	5.22	65.7383			20		44.9					2343.78																	150	0.439496	107.4	5934.79
Pinares-Patino et al. (2008)	Austr J Exp Agric	Domestic cattle	Bos taurus	Ruminant	Foregut	Cattletype_1	2	Pasture	SF6	high bloat	P2			12	343.7						24.8		36.5																						167.039	0.486003	119.6	6608.95
Pinares-Patino et al. (2008)	Austr J Exp Agric	Domestic cattle	Bos taurus	Ruminant	Foregut	Cattletype_1	2	Pasture	SF6	low bloat	P1			12	420.7	7190	7.19	77.4015			20		44.9					3228.31																	201.816	0.479714	144.5	7984.89
Pinares-Patino et al. (2008)	Austr J Exp Agric	Domestic cattle	Bos taurus	Ruminant	Foregut	Cattletype_1	2	Pasture	SF6	low bloat	P2			12	431.4						24.8		36.5																						206.564	0.478823	147.9	8172.77
Pineiro-Vazquez et al. (2017)	Anim Feed Sci Technol	Domestic cattle	Bos taurus	Ruminant	Foregut	Cattletype_1	2	Grass	Respiration chamber					5	293.8	7030	7.03	99.0641	7.97	92.03	6.06		67.06	41.1	7.02	14799.4	6469.71	4714.32	2889.33	104040	1466.09	54.27	55.67	34.54	54.87	53.38		3900	3601.69	2586.75	1542.32	36.4515	54000	760.948	136.989	0.466266	104.249	5420	5.20953
Ritzman & Benedict (1938)	Monograph	Domestic cattle	Bos taurus	Ruminant	Foregut	Cattletype_1	2	hay	Respiration chamber					1	610																														279.33	0.457917	212.57	11051.7
Staerfl et al. (2012)	Livestock Sci	Domestic cattle	Bos taurus	Ruminant	Foregut	Cattletype_1	2	high-sugar ryegrass	Respiration chamber					6	548	14400	14.4	127.138	10.1	89.9	15.8		49.2	27.9	3.01	17900	12945.6	7084.8	4017.6	258000	2277.9		80.2	72.2	81.2	76.2	75.9		10382.4	5752.86	3061.41	50.7923	195822	1728.92	389.665	0.711067	279	15000	6.27
Staerfl et al. (2012)	Livestock Sci	Domestic cattle	Bos taurus	Ruminant	Foregut	Cattletype_1	2	low-sugar ryegrass	Respiration chamber					6	543	15700	15.7	139.572	12.6	87.4	25.5		49.1	27.1	3.19	17900	13721.8	7708.7	4254.7	280000	2489.19		82.2	83	86.5	78.1	78.4		11279.3	6668.03	3322.92	59.2785	219520	1951.53	439.944	0.81021	315	17000	6.28
Swainson (2011)	PhD thesis	Domestic cattle	Bos taurus	Ruminant	Foregut	Cattletype_1	2	Ensiled lucerne chaff	SF6	Winter				7	542	6830	6.83	60.8025	10.1	89.9	21		45.2	34	8.2	19500	6140.17	3087.16	2322.2	133800	1191.12														224.022	0.413325	160.4	8863.5	6.85
Terada et al. (1987)	Book chapter	Domestic cattle	Bos taurus	Ruminant	Foregut	Cattletype_1	2	hay	Respiration chamber						385	8153.08	8.15308	93.805			13.3					18030				147000	1691.3						61						89670	1031.7	222.923	0.57902	169.644	8820	6
Tomkins et al. (2011)	Anim Feed Sci Technol	Domestic cattle	Bos taurus	Ruminant	Foregut	Cattletype_1	2	Pasture	Respiration chamber					18	222	4000	4	69.5497	7.38	92.62	6.96		72.1	46.4		17600	3704.8	2884	1856	70400	1224.07	59	61					2360	2259.93						159.637	0.719085	114.3	6316.07	9.2
Ulyatt et al. (2002)	N Z J Agric Res 217-226	Domestic cattle	Bos taurus	Ruminant	Foregut	Cattletype_1	2	Grass pasture	SF6	Jun				10	489	6800	6.8	65.3924	8.5	91.5	17.6		53.7	53.7			6222	3651.6	3651.6																191.341	0.39129	137	7570.45	6.1
Ulyatt et al. (2002)	N Z J Agric Res 217-226	Domestic cattle	Bos taurus	Ruminant	Foregut	Cattletype_1	2	Grass pasture	SF6	Mar				10	505	14800	14.8	138.929	10.5	89.5	23.7		40.8	40.8			13246	6038.4	6038.4																254.19	0.503346	182	10057.1	3.7
Ulyatt et al. (2002)	N Z J Agric Res 217-226	Domestic cattle	Bos taurus	Ruminant	Foregut	Cattletype_1	2	Grass pasture	SF6	Nov				10	489	18100	18.1	174.059	8.8	91.2	20.1		38.8	38.8			16507.2	7022.8	7022.8																346.369	0.70832	248	13704.2	4.2
Ulyatt et al. (2002)	N Z J Agric Res 217-226	Domestic cattle	Bos taurus	Ruminant	Foregut	Cattletype_1	2	Grass pasture	SF6	Sep				10	475	19300	19.3	189.687	10.3	89.7	23.4		34.8	19.1			17312.1	6716.4	3686.3																601.955	1.26727	431	23816.5	6.8
Ulyatt et al. (2002)	N Z J Agric Res 227-234	Domestic cattle	Bos taurus	Ruminant	Foregut	Cattletype_1	2	Grass pastures	SF6	Kikuyu 1999				8	487	13300	13.3	128.294	9.8	90.2	25.6		41.5	23.6			11996.6	5519.5	3138.8																233.24	0.478933	167	9228.21	3.8
Ulyatt et al. (2002)	N Z J Agric Res 227-234	Domestic cattle	Bos taurus	Ruminant	Foregut	Cattletype_1	2	Grass pastures	SF6	Kikuyu 1997				9	438	15600	15.6	162.937	10.3	89.7	22.6		48.8	27.6			13993.2	7612.8	4305.6																506.983	1.1575	363	20058.9	7.1
Ulyatt et al. (2002)	N Z J Agric Res 227-234	Domestic cattle	Bos taurus	Ruminant	Foregut	Cattletype_1	2	Grass pastures	SF6	Summer grass				8	585	18900	18.9	158.889	9.9	90.1	24.5		45.7	26.3			17028.9	8637.3	4970.7																589.385	1.0075	422	23319.2	6.7
Animut et al. (2008)	Anim Feed Sci Technol	Domestic goat	Capra aegagrus hircus	Ruminant	Foregut	Goat	3	Sorghum-sudangrass	Respiration boxes					24	33.1	648	0.648	46.9574	10.2	89.8	10.5		67.8	39.1		17900	581.904		253.368	11800	855.088	67.3	69.6	65.5			66.5254	436.104	405.005				7850	568.851	26.2	0.791541	19.9382	1036.61	8.77
Bhatta et al. (2006)	J Agri Sci	Domestic goat	Capra aegagrus hircus	Ruminant	Foregut	Goat	3	Alfalfa hay	Respiration chamber					4	26				11.7	88.3	18.6		52.2	34.5		17700						62	65.3	78.5	50.7	50.7	63.2												5.1
Islam et al. (2000)	Asian-Aust J Anim Sci	Domestic goat	Capra aegagrus hircus	Ruminant	Foregut	Goat	3	Alfalfa pellets	Respiration chamber	High				12	32.1	988.8	0.9888	71.37	8.8	91.2	17.1	24.2				18966.2	901.786			18753.8	1390.63	57.8	58.4	69.6			55.9053	571.526	526.643				10484.4	777.434	22.8771	0.712682	16.38	905.605	4.82892
Islam et al. (2000)	Asian-Aust J Anim Sci	Domestic goat	Capra aegagrus hircus	Ruminant	Foregut	Goat	3	Alfalfa pellets	Respiration chamber	Low				12	32.1	494.3	0.4943	37.45	8.8	91.2	17.1	24.2				18966.2	450.802			9374.99	695.172	58.4	59.4	71.1			56.9151	288.671	267.776				5335.79	395.658	13.5894	0.423345	9.73	538.004	5.73871
Nielsen et al. (2014)	Arch Anim Nutr	Domestic goat	Capra aegagrus hircus	Ruminant	Foregut	Goat	3	Grass hay and straw	Respiration chamber	both diets				5	17.25	309.794	0.309794	36.6	5.5	94.5	10.65		69.3	39.95	5.85		292.755	214.687	123.763	11338.1	1339.52	53.5					51.1	165.74					5793.77	684.494	19.2	1.11304	14.6112	759.653	6.7
Puchala et al. (2005)	J Anim Sci	Domestic goat	Capra aegagrus hircus	Ruminant	Foregut	Goat	3	Crabgrass/tall fescue	Respiration boxes					12	40	670	0.67	42.124			13		55.7	49				373.19	328.3			76.1194						510							14.8045	0.370112	10.6	585.369
Puchala et al. (2012)	J Anim Sci	Domestic goat	Capra aegagrus hircus	Ruminant	Foregut	Goat	3	Alfalfa	Respiration boxes	hay				24	37.8	741	0.741	48.6071	9.1	90.9	15.0625		61.4			18600	681	454.974		13930	913.76	63.6	64.4	65.4				471.276	438.564				9170	601.521	14.1538	0.37444	10.7711	560	4.76
Puchala et al. (2012)	J Anim Sci	Domestic goat	Capra aegagrus hircus	Ruminant	Foregut	Goat	3	Sorghum-sudangrass	Respiration boxes	hay				24	37.3	666	0.666	44.1258	9	91	5.5625		66.6			17400	606.06	443.556		11790	781.146	63.3	64.6	54.8				421.578	391.515				7560	500.887	12.8901	0.345579	9.80936	510	4.91
Puchala et al. (2012)	J Anim Sci	Domestic goat	Capra aegagrus hircus	Ruminant	Foregut	Goat	3	Sorghum-sudangrass	Respiration boxes	fresh				24	36.2	740	0.74	50.1418	12.7	87.3	9.5		64.8			18300	691	479.52		13730	930.334	65	69.5	73.2				481	480.245				9310	630.839	21.4835	0.593467	16.3489	850	6.25
Puchala et al. (2012)	J Anim Sci	Domestic goat	Capra aegagrus hircus	Ruminant	Foregut	Goat	3	Alfalfa	Respiration boxes	fresh				24	36.8	785	0.785	52.5392	12	88	19.25		34.8			18500	694	273.18		14690	983.187	60.3	64.4	81.7				473.355	446.936				9130	611.061	21.2307	0.576922	16.1566	840	5.8
Terada et al. (1987)	Book chapter	Domestic goat	Capra aegagrus hircus	Ruminant	Foregut	Goat	3	hay	Respiration chamber						39.1	1042.71	1.04271	66.6852			13.3					18030				18800	1202.33						59.4						11167.2	714.187	25.6589	0.656237	19.5264	1015.2	5.4
Tovar-Luna et al. (2007)	Small Rum Res	Domestic goat	Capra aegagrus hircus	Ruminant	Foregut	Goat	3	Lucerne hay	Respiration boxes	Alpine				6	39.1	673	0.673	43.041								18380.4				12370	791.11	63.2	65.7	79	44.7		62.7	425.336					7860	502.678	9.09889	0.232708	6.92426	360	2.91027
Tovar-Luna et al. (2007)	Small Rum Res	Domestic goat	Capra aegagrus hircus	Ruminant	Foregut	Goat	3	Lucerne hay	Respiration boxes	Angora				6	23.2	457	0.457	43.2315								18380.7				8400	794.627	62.4	64.8	78.2	41.2		60.4	285.168					5170	489.074	6.31867	0.272357	4.80851	250	2.97619
Tovar-Luna et al. (2007)	Small Rum Res	Domestic goat	Capra aegagrus hircus	Ruminant	Foregut	Goat	3	Lucerne hay	Respiration boxes	Spanish				6	33.8	578	0.578	41.2326								18304.5				10580	754.741	59.8	62.3	79.1	37.3		58.1	345.644					6220	443.714	8.34065	0.246765	6.34723	330	3.11909
Tovar-Luna et al. (2007)	Small Rum Res	Domestic goat	Capra aegagrus hircus	Ruminant	Foregut	Goat	3	Lucerne hay	Respiration boxes	Boer				6	41.4	700	0.7	42.8892								18400				12880	789.161	63.7	65.9	80.8	43.9		63.3	445.9					8140	498.74	12.1319	0.29304	9.23234	480	3.72671
Vermorel (1997)	INRA Prod Anim	Domestic goat	Capra aegagrus hircus	Ruminant	Foregut	Goat	3	foin ou herbe	Respiration chamber						60																														40	0.666667	30.44	1582.61
Vermorel (1997)	INRA Prod Anim	Domestic goat	Capra aegagrus hircus	Ruminant	Foregut	Goat	3	foin ou herbe	Respiration chamber						100																														67	0.67	50.987	2650.87
Kawashima et al. (2006)	J Agric Res Quart	Water buffalo	Bubalus bubalis	Ruminant	Foregut	Cattletype_4	4	Ruzi grass hay	Face mask					4	255	3380	3.38	52.9678	6.3	93.7	4.8		72	43		18200	3167.06	2433.6	1453.4	61451.3	963						49.7404						30566.1	479	56.9332	0.223268	43.3262	2252.58	3.66563
Prusty et al. (2014)	Trop Anim Health Prod	Water buffalo	Bubalus bubalis	Ruminant	Foregut	Cattletype_4	4	Oats forage	SF6					5	237.7	4130	4.13	68.2226	12.15	87.85	8.54		51.03			15956.5	3628.2	2107.54		65900.2	1088.59	63.4383	68.0441	68.5714	45.4976			2620	2468.78	958.88		15.8395	46306	764.919	98.1285	0.412825	70.26	3882.48	5.85
Prusty et al. (2014)	Trop Anim Health Prod	Water buffalo	Bubalus bubalis	Ruminant	Foregut	Cattletype_4	4	Berseem forage	SF6					5	208.55	4020	4.02	73.2518	12.45	87.55	17.39		46			16122.3	3519.51	1849.2		64811.7	1180.99	71.393	72.7273	72.8571	49.1892			2870	2559.64	909.606		16.5747	48985.6	892.607	102.388	0.490953	73.31	4051.02	6.17
Prusty et al. (2014)	Trop Anim Health Prod	Water buffalo	Bubalus bubalis	Ruminant	Foregut	Cattletype_4	4	Chicory forage	SF6					5	231.63	4520	4.52	76.1276	11.04	88.96	15.76		43.1			15061.4	4020.99	1948.12		68077.4	1146.59	73.8938	73.8806	70.4225	47.6923			3340	2970.73	929.103		15.6483	53298	897.665	109.413	0.472363	78.34	4328.97	6.34
Galbraith (1997)*	Thesis	Bison	Bison bison	Ruminant	Foregut	Cattletype_2	5	Lucerne pellets	Respiration chamber	b01-2	Bison1			1	195.7	4350	4.35	83.1373	8.28	91.72	13.76		59.83	43.52	10.93	18012	3989.82	2602.61	1893.12	78352.2	1497.47	54.16	57.37	63.13	42.13	40.75	56.36	2355.96	2288.96	1096.48	771.446	20.9559	44159.3	843.974	100.8	0.515074	76.7088	3988.18	5.08
Galbraith (1997)*	Thesis	Bison	Bison bison	Ruminant	Foregut	Cattletype_2	5	Lucerne pellets	Respiration chamber	b03-2	Bison3			1	218.3	5630	5.63	99.133	8.28	91.72	13.76		59.83	43.52	10.93	18012	5163.84	3368.43	2450.18	101408	1785.58	45.68	48.58	59.31	34.25	30.26	45.96	2571.78	2508.59	1153.69	741.423	20.3141	46606.9	820.654	118.1	0.540999	89.8741	4672.66	4.6
Galbraith (1997)*	Thesis	Bison	Bison bison	Ruminant	Foregut	Cattletype_2	5	Lucerne pellets	Respiration chamber	b08-1	Bison8			1	181.1	4280	4.28	86.6972	8.28	91.72	13.76		59.83	43.52	10.93	18012	3925.62	2560.72	1862.66	77091.4	1561.59	61.09	62.44	69.54	52.98	50.08	60.79	2614.65	2451.15	1356.67	932.818	27.4812	46863.8	949.29	184.6	1.01933	140.481	7303.75	9.52
Galbraith (1997)*	Thesis	Bison	Bison bison	Ruminant	Foregut	Cattletype_2	5	Lucerne pellets	Respiration chamber	b06-1	Bison6			1	197.6	3350	3.35	63.563	8.28	91.72	13.76		59.83	43.52	10.93	18012	3072.62	2004.31	1457.92	60340.2	1144.9	40.11	48.36	42.08	31.54	25.98	46.49	1343.68	1485.92	632.158	378.768	11.9946	28052.2	532.263	87.7	0.443826	66.7397	3469.87	5.78
Galbraith (1997)*	Thesis	Bison	Bison bison	Ruminant	Foregut	Cattletype_2	5	Lucerne pellets	Respiration chamber	b08-2	Bison8			1	233.4	4520	4.52	75.6942	8.28	91.72	13.76		59.83	43.52	10.93	18012	4145.74	2704.32	1967.1	81414.2	1363.4	48.79	51.71	60.92	38.18	32.42	50.57	2205.31	2143.76	1032.51	637.735	17.2909	41171.2	689.474	148.3	0.63539	112.856	5867.53	7.2
Galbraith (1997)*	Thesis	Bison	Bison bison	Ruminant	Foregut	Cattletype_2	5	Lucerne pellets	Respiration chamber	b01-1	Bison1			1	162.2	3810	3.81	83.8276	8.28	91.72	13.76		59.83	43.52	10.93	18012	3494.53	2279.52	1658.11	68625.7	1509.9	50.89	53.65	55.81	43.99	42.33	52.09	1938.91	1874.82	1002.76	701.879	22.0628	35747.1	786.508	169.2	1.04316	128.761	6694.44	9.8
Galbraith (1997)*	Thesis	Bison	Bison bison	Ruminant	Foregut	Cattletype_2	5	Lucerne pellets	Respiration chamber	b03-1	Bison3			1	167.9	2460	2.46	52.7408	8.28	91.72	13.76		59.83	43.52	10.93	18012	2256.31	1471.82	1070.59	44309.5	949.968	47.26	50.32	61.96	40.44	37.44	46.86	1162.6	1135.38	595.203	400.83	12.7608	20763.4	445.155	101.5	0.604527	77.2415	4015.87	9.11
Ding et al. (2010)	Anim Feed Sci Technol	Yak	Bos grunniens	Ruminant	Foregut	Cattletype_3	6	Native herbage	SF6					12	174	3780	3.78	78.9005	21.5	78.5	6.8		55.2	28.4		16500	2967.3	2086.56	1073.52	62370	1301.86	56.4	59.5	56.6	55.8		53.6	2131.92	1765.54	1164.3		24.3026	33430.3	697.796	113.687	0.653374	81.4	4498.06	7.3
Ding et al. (2010)	Anim Feed Sci Technol	Yak	Bos grunniens	Ruminant	Foregut	Cattletype_3	6	Oat hay	SF6					3	175.8	3840	3.84	79.5366	6.2	93.8	7.8		53.7	26.9		17700	3601.92	2062.08	1032.96	67968	1407.8	57.9	60.2	62.2	56.1		55.4	2223.36	2168.36	1156.83		23.961	37654.3	779.92	124.162	0.706269	88.9	4912.5	7.3
Perez-Barberia (2017)	Sci Total Environ	Red deer	Cervus elaphus	Ruminant	Foregut	Cervid_2	7	grass_heather	Respiration chamber					1	88.5	1600	1.6	55.4514					47.2289					755.662																	25.6425	0.289745	18.36	1014.55
Perez-Barberia (2017)	Sci Total Environ	Red deer	Cervus elaphus	Ruminant	Foregut	Cervid_2	7	grass_heather	Respiration chamber					1	93.5	1960	1.96	65.185					47.3054					927.185																	25.7263	0.275147	18.42	1017.87
Perez-Barberia (2017)	Sci Total Environ	Red deer	Cervus elaphus	Ruminant	Foregut	Cervid_2	7	grass_heather	Respiration chamber					1	78.25	1880	1.88	71.457					47.2922					889.093																	26.3827	0.337159	18.89	1043.84
Perez-Barberia (2017)	Sci Total Environ	Red deer	Cervus elaphus	Ruminant	Foregut	Cervid_2	7	grass_heather	Respiration chamber					1	72	1490	1.49	60.2819					46.8352					697.845																	27.3883	0.380393	19.61	1083.62
Perez-Barberia (2017)	Sci Total Environ	Red deer	Cervus elaphus	Ruminant	Foregut	Cervid_2	7	grass_heather	Respiration chamber					1	87.5	1810	1.81	63.2663					47.278					855.733																	27.6397	0.315882	19.79	1093.57
Perez-Barberia (2017)	Sci Total Environ	Red deer	Cervus elaphus	Ruminant	Foregut	Cervid_2	7	grass_heather	Respiration chamber					1	96	1540	1.54	50.2131					46.8406					721.346																	29.7626	0.310027	21.31	1177.56
Perez-Barberia (2017)	Sci Total Environ	Red deer	Cervus elaphus	Ruminant	Foregut	Cervid_2	7	grass_heather	Respiration chamber					1	97	1510	1.51	48.8538					46.8363					707.229																	29.8184	0.307407	21.35	1179.77
Perez-Barberia (2017)	Sci Total Environ	Red deer	Cervus elaphus	Ruminant	Foregut	Cervid_2	7	grass_heather	Respiration chamber					1	95.5	1600	1.6	52.3742					50.7817					812.507																	30.2235	0.316476	21.64	1195.8
Perez-Barberia (2017)	Sci Total Environ	Red deer	Cervus elaphus	Ruminant	Foregut	Cervid_2	7	grass_heather	Respiration chamber					1	89.75	1700	1.7	58.3006					50.6973					861.853																	30.2933	0.33753	21.69	1198.56
Perez-Barberia (2017)	Sci Total Environ	Red deer	Cervus elaphus	Ruminant	Foregut	Cervid_2	7	grass_heather	Respiration chamber					1	79.25	1530	1.53	57.6026					46.839					716.636																	31.2849	0.394762	22.4	1237.8
Perez-Barberia (2017)	Sci Total Environ	Red deer	Cervus elaphus	Ruminant	Foregut	Cervid_2	7	grass_heather	Respiration chamber					1	85.25	1660	1.66	59.1681					50.732					842.15																	35.6983	0.418749	25.56	1412.41
Perez-Barberia (2017)	Sci Total Environ	Red deer	Cervus elaphus	Ruminant	Foregut	Cervid_2	7	grass_heather	Respiration chamber					1	97	1710	1.71	55.3245					50.6742					866.528																	36.648	0.377815	26.24	1449.99
Perez-Barberia (2017)	Sci Total Environ	Red deer	Cervus elaphus	Ruminant	Foregut	Cervid_2	7	grass	Respiration chamber					1	65	1150	1.15	50.2357					54.2316					623.663																	37.5	0.576923	26.85	1483.7
Perez-Barberia (2017)	Sci Total Environ	Red deer	Cervus elaphus	Ruminant	Foregut	Cervid_2	7	grass	Respiration chamber					1	72	1140	1.14	46.1217					54.2316					618.24																	38.9525	0.541007	27.89	1541.17
Perez-Barberia (2017)	Sci Total Environ	Red deer	Cervus elaphus	Ruminant	Foregut	Cervid_2	7	grass	Respiration chamber					1	71	1150	1.15	47.0169					54.2316					623.663																	45.1257	0.635573	32.31	1785.41
Perez-Barberia (2017)	Sci Total Environ	Red deer	Cervus elaphus	Ruminant	Foregut	Cervid_2	7	grass	Respiration chamber					1	87	1170	1.17	41.0721					54.2316					634.509
Swainson (2011)	PhD thesis	Red deer	Cervus elaphus	Ruminant	Foregut	Cervid_2	7	Ensiled lucerne chaff	SF6	Winter				9	144	1860	1.86	44.7446	10.1	89.9	21		45.2	34	8.2	19500	1672.14	840.72	632.4	36300	873.242	62.2	64	71.8	49	50.8		1156.92	1070.17	411.953	321.259	9.91004			40.7821	0.283209	29.2	1613.56	4.36
Swainson (2011)	PhD thesis	Red deer	Cervus elaphus	Ruminant	Foregut	Cervid_2	7	Ensiled lucerne chaff	SF6	Summer				9	158	2040	2.04	45.7759	9.9	90.1	21		45.1	33.7	8.3	19600	1838.04	920.04	687.48	39900	895.324	58	60.3	58	45.3	45.5		1183.2	1108.34	416.778	312.803	9.35216			46.9274	0.297009	33.6	1856.69	4.82
Swainson et al. (2007)	N Zeal J Agric Res	Red deer	Cervus elaphus	Ruminant	Foregut	Cervid_2	7	Ryegrass pasture	SF6	4.5				20	47.9532	1660	1.66	91.0951	9.3	90.7	18.7		45.6	24	2.4		1505.62	756.96	398.4																34.3575	0.71648	24.6	1359.37
Swainson et al. (2007)	N Zeal J Agric Res	Red deer	Cervus elaphus	Ruminant	Foregut	Cervid_2	7	Ryegrass pasture	SF6	9				20	67.0124	1850	1.85	78.9869	9.8	90.2	21.2		43.6	22.9	1.9		1668.7	806.6	423.65																45.1117	0.673184	32.3	1784.86
Swainson et al. (2007)	N Zeal J Agric Res	Red deer	Cervus elaphus	Ruminant	Foregut	Cervid_2	7	Ryegrass pasture	SF6	6.5				20	57.9505	1930	1.93	91.8892	9.6	90.4	20.5		43.6	22.9	2		1744.72	841.48	441.97																45.8101	0.790503	32.8	1812.49
Swainson et al. (2007)	N Zeal J Agric Res	Red deer	Cervus elaphus	Ruminant	Foregut	Cervid_2	7	Ryegrass pasture	SF6	11.5				20	83.0228	2270	2.27	82.5331	9.6	90.4	20.4		42.9	23.7	1.5		2052.08	973.83	537.99																56.0056	0.674581	40.1	2215.88
Galbraith (1997)*	Thesis	Wapiti	Cervus elaphus wapiti	Ruminant	Foregut	Cervid_3	7	Lucerne pellets	Respiration chamber	e02-1	Elk2	1		1	152.6	2430	2.43	55.9681	8.28	91.72	13.76		59.83	43.52	10.93	18012	2228.8	1453.87	1057.54	43769.2	1008.1	49.53	54.02	44.61	46	43.05	52.55	1203.58	1204	668.78	455.269	15.4034	23000.7	529.755	64.6	0.423329	49.1606	2555.92	4.97
Galbraith (1997)*	Thesis	Wapiti	Cervus elaphus wapiti	Ruminant	Foregut	Cervid_3	7	Lucerne pellets	Respiration chamber	e03-1	Elk3	1		1	155	2730	2.73	62.1461	8.28	91.72	13.76		59.83	43.52	10.93	18012	2503.96	1633.36	1188.1	49172.8	1119.38	51.57	54.2	55.27	45.36	42.8	51.02	1407.86	1357.14	740.892	508.505	16.8658	25087.9	571.105	70.8	0.456774	53.8788	2801.22	4.19
Galbraith (1997)*	Thesis	Wapiti	Cervus elaphus wapiti	Ruminant	Foregut	Cervid_3	7	Lucerne pellets	Respiration chamber	e05-1	Elk5	1		1	146.8	1910	1.91	45.2886	8.28	91.72	13.76		59.83	43.52	10.93	18012	1751.85	1142.75	831.232	34402.9	815.738	56.31	57.95	60.36	48.2	47.07	55.43	1075.52	1015.2	550.807	391.261	13.0604	19069.5	452.164	106.2	0.723433	80.8182	4201.83	9.3
Galbraith (1997)*	Thesis	Wapiti	Cervus elaphus wapiti	Ruminant	Foregut	Cervid_3	7	Lucerne pellets	Respiration chamber	e14-1	Elk14	1		1	138.9	1660	1.66	41.0281	8.28	91.72	13.76		59.83	43.52	10.93	18012	1522.55	993.178	722.432	29899.9	738.998	57.4	59.73	60.85	50.92	50.03	57.54	952.84	909.42	505.726	361.433	12.4994	17204.4	425.22	66.2	0.476602	50.3782	2619.22	5.4
Galbraith (1997)*	Thesis	Wapiti	Cervus elaphus wapiti	Ruminant	Foregut	Cervid_3	7	Lucerne pellets	Respiration chamber	e27-1	Elk27	1		1	152.2	3200	3.2	73.848	8.28	91.72	13.76		59.83	43.52	10.93	18012	2935.04	1914.56	1392.64	57638.4	1330.15	52.75	54.88	58.27	45.13	44.04	52.59	1688	1610.75	864.041	613.319	19.9399	30312	699.526	110.8	0.727989	84.3188	4383.83	8.2
Galbraith (1997)*	Thesis	Wapiti	Cervus elaphus wapiti	Ruminant	Foregut	Cervid_3	7	Lucerne pellets	Respiration chamber	e02-2	Elk2	2		1	169.5	5660	5.66	120.487	8.28	91.72	13.76		59.83	43.52	10.93	18012	5191.35	3386.38	2463.23	101948	2170.21	47.76	50.78	58.83	39.15	34.57	46.97	2703.22	2636.17	1325.77	851.539	28.2221	47884.9	1019.35	104.4	0.615929	79.4484	4130.61	4.25
Galbraith (1997)*	Thesis	Wapiti	Cervus elaphus wapiti	Ruminant	Foregut	Cervid_3	7	Lucerne pellets	Respiration chamber	e03-2	Elk3	2		1	159.6	5670	5.67	126.272	8.28	91.72	13.76		59.83	43.52	10.93	18012	5200.52	3392.36	2467.58	102128	2274.42	46.9	49.82	56.25	37.56	32.26	47.63	2659.23	2590.9	1274.17	796.043	28.3761	48643.6	1083.31	89.6	0.561404	68.1856	3545.05	3.89
Galbraith (1997)*	Thesis	Wapiti	Cervus elaphus wapiti	Ruminant	Foregut	Cervid_3	7	Lucerne pellets	Respiration chamber	e05-2	Elk5	2		1	161.4	4360	4.36	96.285	8.28	91.72	13.76		59.83	43.52	10.93	18012	3998.99	2608.59	1897.47	78532.3	1734.29	54.83	57.18	61.02	47.12	45.62	53.99	2390.59	2286.62	1229.17	865.627	27.1446	42399.6	936.341	77.8	0.482032	59.2058	3078.18	4.29
Galbraith (1997)*	Thesis	Wapiti	Cervus elaphus wapiti	Ruminant	Foregut	Cervid_3	7	Lucerne pellets	Respiration chamber	e14-2	Elk14	2		1	153.8	5630	5.63	128.911	8.28	91.72	13.76		59.83	43.52	10.93	18012	5163.84	3368.43	2450.18	101408	2321.95	47.94	50.93	56.68	41.51	38.61	45.43	2699.02	2629.94	1398.23	946.013	32.0157	46069.5	1054.86	84	0.546164	63.924	3323.48	3.21
Galbraith (1997)*	Thesis	Wapiti	Cervus elaphus wapiti	Ruminant	Foregut	Cervid_3	7	Lucerne pellets	Respiration chamber	e27-2	Elk27	2		1	122.8	4950	4.95	134.186	8.28	91.72	13.76		59.83	43.52	10.93	18012	4540.14	2961.59	2154.24	89159.4	2416.95	47.49	50.97	53.27	38.98	34.84	48.58	2350.76	2314.11	1154.43	750.537	31.2944	43313.6	1174.16	98	0.798046	74.578	3877.4	4.05
This study		Moose	Alces alces	Ruminant	Foregut	Cervid_1	8	Lucerne hay & pelleted lucerne	Respiration chamber	AA1				1	200	4040.67	4.04067	75.9768	8.81191	91.1881	19.8397		43.456	31.0189		19184.1	3684.61	1755.91	1253.37	77516.8	1457.55	52.9376	52.8626	72.8915	20.7	19.7	50.7461	2139.03	1947.78	363.474	246.914	6.83441	39336.7	739.649	94.5794	0.472897	67.7188	3646.03	4.70354
This study		Moose	Alces alces	Ruminant	Foregut	Cervid_1	8	Lucerne hay & pelleted lucerne	Respiration chamber	AA2				1	315	5887.09	5.88709	78.735	8.66391	91.3361	19.9327		49.2327	36.0056		18836.2	5377.04	2898.37	2119.68	110891	1483.07	58.1548	58.5228	75.2399	39.2837	39.6911	55.8295	3423.62	3146.8	1138.59	841.325	15.2277	61909.7	827.991	120.936	0.383924	86.5903	4662.09	4.20422
Galbraith (1997)*	Thesis	White-tailed deer	Odocoileus virginianus	Ruminant	Foregut	Cervid_4	9	Lucerne pellets	Respiration chamber	d1114-1	Deer11,14	1		1	34.15	1060	1.06	75.0348	8.28	91.72	13.76		59.83	43.52	10.93	18012	972.232	634.198	461.312	19092.7	1351.53	47.02	49.07	58.19	37.63	32.72	46.85	498.412	477.074	238.649	150.941	16.8934	8944.94	633.19	25.9	0.758419	19.7099	1024.74	2.77
Galbraith (1997)*	Thesis	White-tailed deer	Odocoileus virginianus	Ruminant	Foregut	Cervid_4	9	Lucerne pellets	Respiration chamber	d12-1	Deer1,2	1		1	32.8				8.28	91.72	13.76		59.83	43.52	10.93					34105.3	2488.38														43.1	1.31402	32.7991	1705.26	5.03
Galbraith (1997)*	Thesis	White-tailed deer	Odocoileus virginianus	Ruminant	Foregut	Cervid_4	9	Lucerne pellets	Respiration chamber	d412-1	Deer4,12	1		1	28.8	450	0.45	36.1966	8.28	91.72	13.76		59.83	43.52	10.93	18012	412.74	269.235	195.84	8105.4	651.974	38.12	40.4	47.51	26.45	21.35	35.5	171.54	166.747	71.2127	41.8118	5.72813	2877.42	231.451	24.1	0.836806	18.3401	953.523	3.89
Galbraith (1997)*	Thesis	White-tailed deer	Odocoileus virginianus	Ruminant	Foregut	Cervid_4	9	Lucerne pellets	Respiration chamber	d515-1	Deer5,15	1		1	38.7	730	0.73	47.0478	8.28	91.72	13.76		59.83	43.52	10.93	18012	669.556	436.759	317.696	13148.8	847.426	51.5	52.9	61.82	44.22	40.17	50.11	375.95	354.195	193.135	127.618	12.4474	6588.84	424.645	20.7	0.534884	15.7527	819.001	2.31
Galbraith (1997)*	Thesis	White-tailed deer	Odocoileus virginianus	Ruminant	Foregut	Cervid_4	9	Lucerne pellets	Respiration chamber	d1114-2	Deer11,14	2		1	36.35	1530	1.53	103.351	8.28	91.72	13.76		59.83	43.52	10.93	18012	1403.32	915.399	665.856	27558.4	1861.55	47.46	49.81	59.63	37.35	33.17	46.17	726.138	698.992	341.902	220.864	23.0953	12723.7	859.478	35.5	0.976616	27.0155	1404.57	2.88
Galbraith (1997)*	Thesis	White-tailed deer	Odocoileus virginianus	Ruminant	Foregut	Cervid_4	9	Lucerne pellets	Respiration chamber	d12-2	Deer1,2	2		1	31.55	1040	1.04	78.1239	8.28	91.72	13.76		59.83	43.52	10.93	18012	953.888	622.232	452.608	18732.5	1407.17	48.56	51.7	56.88	38.28	33.51	50.48	505.024	493.16	238.19	151.669	17.8927	9456.16	710.338	42.6	1.35024	32.4186	1685.48	3.24
Galbraith (1997)*	Thesis	White-tailed deer	Odocoileus virginianus	Ruminant	Foregut	Cervid_4	9	Lucerne pellets	Respiration chamber	d412-2	Deer4,12	2		1	30	970	0.97	75.6712	8.28	91.72	13.76		59.83	43.52	10.93	18012	889.684	580.351	422.144	17471.6	1362.99	47.69	49.46	58.65	39.75	36.32	46.07	462.593	440.038	230.69	153.323	17.9965	8049.18	627.93	25.6	0.853333	19.4816	1012.87	3.41
Galbraith (1997)*	Thesis	White-tailed deer	Odocoileus virginianus	Ruminant	Foregut	Cervid_4	9	Lucerne pellets	Respiration chamber	d515-2	Deer5,15	2		1	41.25	1400	1.4	86.0122	8.28	91.72	13.76		59.83	43.52	10.93	18012	1284.08	837.62	609.28	25216.8	1549.25	48.49	50.19	60.26	38.27	33.85	47.8	678.86	644.48	320.557	206.241	19.6942	12053.6	740.542	41.2	0.998788	31.3532	1630.09	2.9
This study & Dittmann et al. (2015ab)	Mamm Biol / Comp Biochem Physiol A	Soemmerring's gazelle	Nanger soemmerringii	Ruminant	Foregut	Antelope_4	11	Fresh lucerne & pelleted lucerne	Respiration chamber	NS1				1	40.1	1167.73	1.16773	73.2795	16.1839	83.8161	20.1859		40.8551	30.9588	7.7428	16816.4	978.742	477.075	361.514	19636.9	1232.29	66.007	67.5577	78.5948	52.0119	52.0082	65.2366	770.781	661.215	248.136	188.017	15.5715	12810.4	803.907	14.8054	0.369213	10.6007	570.75	2.90652
This study & Dittmann et al. (2015ab)	Mamm Biol / Comp Biochem Physiol A	Soemmerring's gazelle	Nanger soemmerringii	Ruminant	Foregut	Antelope_4	11	Fresh lucerne & pelleted lucerne	Respiration chamber	NS2				1	36.2	946.914	0.946914	64.1622	16.0131	83.9869	20.091		41.2732	31.2843	7.88417	16831.6	795.283	390.821	296.235	15938.1	1079.95	66.6203	68.3368	79.9085	52.7629	53.9136	65.9541	630.837	543.471	206.209	159.711	13.9725	10511.8	712.274	10.8198	0.298889	7.74696	417.102	2.61701
This study & Dittmann et al. (2015ab)	Mamm Biol / Comp Biochem Physiol A	Soemmerring's gazelle	Nanger soemmerringii	Ruminant	Foregut	Antelope_4	11	Fresh lucerne & pelleted lucerne	Respiration chamber	NS6				1	28.9	626.978	0.626978	50.3013	16.8022	83.1978	20.2163		41.154	30.6049	7.47061	16736.3	521.632	258.026	191.886	10493.3	841.857	68.7677	70.6141	79.5138	55.8077	60.4423	68.0252	431.158	368.346	143.999	115.98	11.5527	7138.08	572.675	12.3074	0.42586	8.81207	474.449	4.52145
This study & Dittmann et al. (2015ab)	Mamm Biol / Comp Biochem Physiol A	Soemmerring's gazelle	Nanger soemmerringii	Ruminant	Foregut	Antelope_4	11	Fresh lucerne & pelleted lucerne	Respiration chamber	NS4				1	39.3	1062.42	1.06242	67.6866	15.9352	84.0648	20.0566		41.3973	31.4499	7.9057	16851.6	893.123	439.814	334.13	17903.5	1140.62	64.9463	66.8588	77.5777	47.6274	53.9192	64.3908	690.004	597.132	209.472	180.161	13.3454	11528.2	734.457	16.0511	0.408424	11.4926	618.768	3.45614
This study & Dittmann et al. (2015ab)	Mamm Biol / Comp Biochem Physiol A	Soemmerring's gazelle	Nanger soemmerringii	Ruminant	Foregut	Antelope_4	11	Fresh lucerne & pelleted lucerne	Respiration chamber	NS3				1	36.1	750.53	0.75053	50.961	15.9928	84.0072	20.0381		41.4961	30.9167	7.69267	16862.6	630.499	311.441	232.039	12655.9	859.335	67.0002	68.4129	78.9653	56.1617	53.3261	65.689	502.857	431.343	174.911	123.737	11.8764	8313.53	564.488	10.8994	0.301922	7.80395	420.171	3.31996
This study & Dittmann et al. (2015ab)	Mamm Biol / Comp Biochem Physiol A	Soemmerring's gazelle	Nanger soemmerringii	Ruminant	Foregut	Antelope_4	11	Fresh lucerne & pelleted lucerne	Respiration chamber	NS5				1	29.9	672.14	0.67214	52.5662	16.1612	83.8388	20.2555		40.19	30.375	7.71364	16853.3	563.514	270.133	204.163	11327.8	885.914	69.1752	71.6823	79.82	57.0632	62.2454	68.8814	464.954	403.94	154.147	127.082	12.0554	7802.74	610.23	14.803	0.495084	10.599	570.656	5.03767
This study & Dittmann et al. (2015ab)	Mamm Biol / Comp Biochem Physiol A	Mountain gazelle	Gazella gazella	Ruminant	Foregut	Antelope_3	12	Fresh lucerne & pelleted lucerne	Respiration chamber	IG1				1	16.5	359.09	0.35909	43.8622	17.7792	82.2208	24.0412		37.5444	29.1496	7.41145	16282.2	295.247	134.818	104.673	5846.78	714.173	50.8599	54.4999	71.9291	25.5074	30.2899	48.7683	182.633	160.909	34.3886	31.7054	4.2005	2851.38	348.29	11.2479	0.681692	8.05352	433.608	7.41618
This study & Dittmann et al. (2015ab)	Mamm Biol / Comp Biochem Physiol A	Mountain gazelle	Gazella gazella	Ruminant	Foregut	Antelope_3	12	Fresh lucerne & pelleted lucerne	Respiration chamber	IG5				1	15.9	340.249	0.340249	42.7316	17.4365	82.5635	23.4832		38.8245	30.3951	7.47986	16328.2	280.922	132.1	103.419	5555.66	697.73	60.449	63.4014	77.0861	46.3787	74.3285	59.577	205.677	178.108	61.2663	76.8699	7.69438	3309.9	415.687	10.9043	0.685803	7.80746	420.36	7.56634
This study & Dittmann et al. (2015ab)	Mamm Biol / Comp Biochem Physiol A	Mountain gazelle	Gazella gazella	Ruminant	Foregut	Antelope_3	12	Fresh lucerne & pelleted lucerne	Respiration chamber	IG2				1	16.9	358.76	0.35876	43.0416	17.3416	82.6584	22.9928		39.7773	31.2578	7.65547	16356.1	296.545	142.705	112.141	5867.91	703.993	59.1696	61.732	76.1584	42.4741	44.2069	57.2957	212.277	183.063	60.6127	49.5738	7.27191	3362.06	403.358	10.7394	0.635466	7.6894	414.003	7.05537
This study & Dittmann et al. (2015ab)	Mamm Biol / Comp Biochem Physiol A	Mountain gazelle	Gazella gazella	Ruminant	Foregut	Antelope_3	12	Fresh lucerne & pelleted lucerne	Respiration chamber	IG4				1	18	444.488	0.444488	50.8634	17.4125	82.5875	23.0284		39.5564	31.0225	7.57272	16335.1	367.091	175.823	137.891	7260.74	830.858	65.8786	68.5605	81.3649	55.7371	79.1581	65.1557	292.822	251.68	97.9989	109.152	11.2142	4730.79	541.351	13.8189	0.767718	9.89434	532.719	7.33698
This study & Dittmann et al. (2015ab)	Mamm Biol / Comp Biochem Physiol A	Mountain gazelle	Gazella gazella	Ruminant	Foregut	Antelope_3	12	Fresh lucerne & pelleted lucerne	Respiration chamber	IG3				1	14.2	283.425	0.283425	38.7455	17.6371	82.3629	23.6894		38.9154	29.9313	7.6266	16319.3	233.437	110.296	84.8326	4625.29	632.299	68.586	70.9899	82.1179	55.1819	58.1814	67.5796	194.39	165.716	60.8633	49.3568	8.3203	3125.75	427.305	10.1192	0.71262	7.24535	390.095	8.43396
This study & Dittmann et al. (2015ab)	Mamm Biol / Comp Biochem Physiol A	Speke's gazelle	Gazella spekei	Ruminant	Foregut	Antelope_2	13	Fresh lucerne & pelleted lucerne	Respiration chamber	SG3				1	10.9	278.71	0.27871	46.4604	16.6617	83.3383	21.5959		35.2529	27.6812	7.71078	16708	232.272	98.2535	77.1503	4656.7	776.261	66.2862	69.547	79.2526	50.3841	52.0311	66.8845	184.746	161.538	49.5042	40.1421	8.25225	3114.61	519.198	7.74394	0.710453	5.54466	298.529	6.41075
This study & Dittmann et al. (2015ab)	Mamm Biol / Comp Biochem Physiol A	Speke's gazelle	Gazella spekei	Ruminant	Foregut	Antelope_2	13	Fresh lucerne & pelleted lucerne	Respiration chamber	SG5				1	13	311.774	0.311774	45.5389	16.1283	83.8717	21.2979		37.9421	30.1263	8.18497	16712.4	261.49	118.294	93.926	5210.51	761.066	64.8641	67.5299	77.5624	45.0742	50.3777	65.2567	202.229	176.584	53.3198	47.3178	7.7881	3400.21	496.647	10.8806	0.836968	7.7905	419.447	8.05002
This study & Dittmann et al. (2015ab)	Mamm Biol / Comp Biochem Physiol A	Speke's gazelle	Gazella spekei	Ruminant	Foregut	Antelope_2	13	Fresh lucerne & pelleted lucerne	Respiration chamber	SG6				1	13.6	259.179	0.259179	36.5971	15.9708	84.0292	21.0087		38.9116	30.8296	8.40853	16688.8	217.786	100.851	79.9039	4325.38	610.76	60.6704	63.657	77.9701	40.1586	45.7839	60.1104	157.245	138.636	40.5003	36.5831	5.71879	2600	367.13	8.19926	0.602886	5.87067	316.081	7.30759
This study & Dittmann et al. (2015ab)	Mamm Biol / Comp Biochem Physiol A	Speke's gazelle	Gazella spekei	Ruminant	Foregut	Antelope_2	13	Fresh lucerne & pelleted lucerne	Respiration chamber	SG2				1	13.6	270.702	0.270702	38.2241	15.9758	84.0242	21.5655		38.0633	29.9929	8.31672	16744.4	227.455	103.038	81.1913	4532.75	640.041	60.4739	62.2586	75.195	35.0231	39.6541	60.0734	163.704	141.61	36.0872	32.1957	5.09565	2722.97	384.494	9.60958	0.706587	6.88046	370.449	8.17273
This study & Dittmann et al. (2015ab)	Mamm Biol / Comp Biochem Physiol A	Speke's gazelle	Gazella spekei	Ruminant	Foregut	Antelope_2	13	Fresh lucerne & pelleted lucerne	Respiration chamber	SG1				1	11.1	306.594	0.306594	50.4164	16.3617	83.6383	21.6532		36.9888	29.2489	7.95644	16712.2	256.431	113.406	89.6755	5123.87	842.569	63.4317	65.8708	79.204	44.2266	47.2273	62.9239	194.478	168.913	50.1554	42.3513	8.24756	3224.14	530.178	9.17748	0.8268	6.57108	353.792	6.90478
This study & Dittmann et al. (2014, 2015)	Comp Biochem Physiol A	Dikdik	Madoqua saltiana	Ruminant	Foregut	Antelope_1	14	Fresh lucerne & pelleted lucerne	Respiration chamber	MS3				1	1.748	55.7549	0.0557549	36.6756	19.3554	80.6446	29.6858		20.792	15.4321	4.52802	17358.5	44.9633	11.5926	8.60413	967.821	636.633	77.548	83.1268	85.4176	77.0594	73.9807	80.7323	43.2368	37.3766	8.93315	6.3654	5.87623	781.345	513.969	1.54102	0.881588	1.10337	59.4062	6.13814
This study & Dittmann et al. (2014, 2015)	Comp Biochem Physiol A	Dikdik	Madoqua saltiana	Ruminant	Foregut	Antelope_1	14	Fresh lucerne & pelleted lucerne	Respiration chamber	MS7				1	1.885	51.0489	0.0510489	31.7324	19.3901	80.6099	29.3357		20.6448	15.3737	4.54343	17376.4	41.1505	10.5389	7.84813	887.045	551.394	76.9132	82.3059	83.4182	71.1639	69.8311	80.3044	39.2634	33.8693	7.49992	5.48044	4.66201	712.337	442.794	1.28861	0.683612	0.922643	49.6758	5.60014
This study & Dittmann et al. (2014, 2015)	Comp Biochem Physiol A	Dikdik	Madoqua saltiana	Ruminant	Foregut	Antelope_1	14	Fresh lucerne & pelleted lucerne	Respiration chamber	MS5				1	1.96	57.3234	0.0573234	34.6051	19.8418	80.1582	29.0395		20.6175	15.3067	4.43047	17283.3	45.9494	11.8186	8.77435	990.736	598.089	77.9333	82.0876	86.689	74.2617	71.7009	80.7202	44.674	37.7188	8.77672	6.29129	5.29834	799.724	482.779	1.77454	0.90538	1.27057	68.4087	6.90483
This study & Dittmann et al. (2014, 2015)	Comp Biochem Physiol A	Dikdik	Madoqua saltiana	Ruminant	Foregut	Antelope_1	14	Fresh lucerne & pelleted lucerne	Respiration chamber	MS1				1	2.148	48.0825	0.0480825	27.0995	20.0309	79.9691	29.2388		20.506	14.4807	4.40216	17261.5	38.4512	9.85981	6.96267	829.978	467.779	74.434	80.1384	78.7475	75.1448	71.876	77.8004	35.7897	30.8142	7.40913	5.00449	4.17582	645.726	363.934	1.1052	0.514524	0.791322	42.6054	5.13332
This study & Dittmann et al. (2014, 2015)	Comp Biochem Physiol A	Dikdik	Madoqua saltiana	Ruminant	Foregut	Antelope_1	14	Fresh lucerne & pelleted lucerne	Respiration chamber	MS4				1	2.193	62.8583	0.0628583	34.8806	19.0096	80.9904	29.5937		20.5622	15.0098	4.46321	17339.6	50.9092	12.925	9.43488	1089.94	604.817	73.5133	79.8586	82.6272	69.0094	66.2915	77.2018	46.2092	40.6554	8.9195	6.25452	4.9495	841.453	466.929	1.48448	0.676916	1.06288	57.2266	5.25043
This study & Dittmann et al. (2014, 2015)	Comp Biochem Physiol A	Dikdik	Madoqua saltiana	Ruminant	Foregut	Antelope_1	14	Fresh lucerne & pelleted lucerne	Respiration chamber	MS2				1	2.01	54.9544	0.0549544	32.5541	18.9776	81.0224	29.8169		20.415	15.083	4.354	17379.3	44.5254	11.2189	8.2888	955.07	565.768	78.0083	82.6326	85.8382	76.9263	74.7784	81.2842	42.869	36.7925	8.63031	6.19823	5.11245	776.321	459.88	2.12932	1.05936	1.52459	82.0852	8.59468
This study & Dittmann et al. (2014, 2015)	Comp Biochem Physiol A	Dikdik	Madoqua saltiana	Ruminant	Foregut	Antelope_1	14	Fresh lucerne & pelleted lucerne	Respiration chamber	MS6				1	2.02	44.901	0.044901	26.4998	20.6794	79.3206	29.5423		20.689	14.9518	4.70973	17338.5	35.6157	9.28958	6.71352	778.514	459.466	72.2553	78.7689	82.6143	68.4228	63.3981	75.7581	32.4433	28.0541	6.35619	4.25625	3.75131	589.788	348.082	1.34222	0.664467	0.961032	51.7427	6.64634
Dittmann et al. (2014, 2015)	PLoS One / J Comp Physiol B	Alpaca	Lama pacos	Ruminant	Foregut	Camel_1	15	Lucerne hay & pelleted lucerne	Respiration chamber	VP4	Jackie			1	53	1274.64	1.27464	64.8905	10.3381	89.6619	16.9314	31.6458	50.3426	27.4476	8.33984	18594.2	1142.87	641.688	349.858	23701	1206.59	64.2344	66.5655	72.3177	59.7594	45.6611	64.5082	818.759	760.755	383.469	159.749	19.5219	15289.1	778.348	33.2422	0.627211	23.8014	1281.49	5.4069
Dittmann et al. (2014, 2015)	PLoS One / J Comp Physiol B	Alpaca	Lama pacos	Ruminant	Foregut	Camel_1	15	Lucerne hay & pelleted lucerne	Respiration chamber	VP2	Lambada			1	50	886.597	0.886597	47.1518	10.4449	89.5551	15.8987	31.244	47.0267	43.5338	8.41343	18253.2	793.993	416.937	385.969	16183.3	860.673	60.2779	62.1498	70.0294	47.7496	56.8847	59.3313	534.422	493.465	199.086	219.558	10.588	9601.73	510.649	13.0668	0.261336	9.35584	503.726	3.11264
Dittmann et al. (2014, 2015)	PLoS One / J Comp Physiol B	Alpaca	Lama pacos	Ruminant	Foregut	Camel_1	15	Lucerne hay & pelleted lucerne	Respiration chamber	VP5	Lucie			1	64	979.092	0.979092	43.2702	11.6636	88.3364	18.6402	29.3125	43.6394	23.9131	6.99961	18626.5	864.895	427.27	234.131	18237.1	805.972	47.5685	50.0885	62.0467	33.3217	10.6157	47.2171	465.74	433.213	142.373	24.8548	6.29207	8611.01	380.557	27.1462	0.424159	19.4366	1046.48	5.73822
Dittmann et al. (2014, 2015)	PLoS One / J Comp Physiol B	Alpaca	Lama pacos	Ruminant	Foregut	Camel_1	15	Lucerne hay & pelleted lucerne	Respiration chamber	VP3	Yauka			1	71	1388.39	1.38839	56.7634	11.1025	88.8975	18.4021	25.5404	46.1939	35.9324	6.70424	18395.2	1234.25	641.353	498.883	25539.8	1044.17	63.433	64.9207	76.5933	52.0739	52.0198	62.481	880.7	801.282	333.977	259.518	13.6544	15957.5	652.41	22.0941	0.311185	15.8194	851.729	3.33491
Dittmann et al. (2014, 2015)	PLoS One / J Comp Physiol B	Alpaca	Lama pacos	Ruminant	Foregut	Camel_1	15	Lucerne hay & pelleted lucerne	Respiration chamber	VP1	Rico			1	79	1152.07	1.15207	43.477	11.997	88.003	19.339	23.17	44.5693	34.6624	6.34042	18374.5	1013.86	513.471	399.336	21168.7	798.867	57.2335	59.068	72.307	41.6799	41.5523	57.123	659.371	598.866	214.014	165.933	8.07649	12092.2	456.336	17.3295	0.219361	12.4079	668.053	3.15585
Pinares-Patino et al. (2003)	J Agric Sci 215-226	Alpaca	Lama pacos	Ruminant	Foregut	Camel_1	15	Lucerne hay	SF6					6	63.3	870.732	0.870732	38.8	8.8	91.2	22.9375		39.4	33.2		19072.2	794.108	343.068	289.083	16606.7	740														20.8101	0.328753	14.9	823.355	4.95796
Pinares-Patino et al. (2003)	J Agric Sci 215-226	Alpaca	Lama pacos	Ruminant	Foregut	Camel_1	15	Birdsfoot trefoil pasture	SF6					6	63.2	903.323	0.903323	40.3	7.9	92.1	20		38	28.2		19106.7	831.96	343.263	254.737	17259.5	770														26.676	0.422088	19.1	1055.44	6.11513
Pinares-Patino et al. (2003)	J Agric Sci 215-226	Alpaca	Lama pacos	Ruminant	Foregut	Camel_1	15	Ryegrass clover pasture	SF6					6	65.1	767.769	0.767769	33.5	9.5	90.5	16.25		48.6	30.3		18209	694.831	373.136	232.634	13980.3	610														31.5642	0.484858	22.6	1248.85	8.93293
Dittmann et al. (2014, 2015)	PLoS One / J Comp Physiol B	Llama	Lama glama	Ruminant	Foregut	Camel_2	16	Lucerne hay & pelleted lucerne	Respiration chamber	LG5	Sorpresa			1	160	2542.46	2.54246	56.515	10.6477	89.3523	15.5881	33.4495	50.6725	38.1675	8.02852	18154.5	2271.74	1288.33	970.392	46157.1	1026	52.3327	55.5469	61.7332	43.9558	44.5234	52.3365	1330.54	1261.88	566.294	432.051	12.5879	24157	536.974	46.5297	0.29081	33.3152	1793.72	3.88612
Dittmann et al. (2014, 2015)	PLoS One / J Comp Physiol B	Llama	Lama glama	Ruminant	Foregut	Camel_2	16	Lucerne hay & pelleted lucerne	Respiration chamber	LG1	Santoro			1	190	3410.19	3.41019	66.6367	10.4993	89.5007	15.3227	34.278	52.397	38.3983	8.35387	18197.8	3052.14	1786.84	1309.45	62057.9	1212.64	55.0581	58.4765	63.1254	48.5747	45.5918	55.8233	1877.59	1784.79	867.951	597.004	16.9602	34642.8	676.936	70.9652	0.373501	50.8111	2735.71	4.40832
Dittmann et al. (2014, 2015)	PLoS One / J Comp Physiol B	Llama	Lama glama	Ruminant	Foregut	Camel_2	16	Lucerne hay & pelleted lucerne	Respiration chamber	LG2	Chennai			1	140	2152.13	2.15213	52.8778	11.3518	88.6482	16.0162	30.8759	48.1924	35.205	6.9777	18028.8	1907.83	1037.16	757.659	38800.4	953.323	53.2368	56.1383	59.7483	44.0695	42.4146	52.5116	1145.73	1071.02	457.073	321.358	11.2303	20374.7	500.605	41.092	0.293515	29.4219	1584.1	4.08269
Dittmann et al. (2014, 2015)	PLoS One / J Comp Physiol B	Llama	Lama glama	Ruminant	Foregut	Camel_2	16	Lucerne hay & pelleted lucerne	Respiration chamber	LG6	Tanash			1	150	1933.51	1.93351	45.1105	11.5502	88.4498	16.2021	30.1469	47.5087	34.5031	6.91896	18397.7	1710.19	918.586	667.122	35572.2	829.931	43.117	46.9096	53.9695	31.0359	28.5873	43.8453	833.671	802.242	285.092	190.712	6.65145	15596.7	363.886	47.5299	0.316866	34.0314	1832.28	5.15087
Dittmann et al. (2014, 2015)	PLoS One / J Comp Physiol B	Llama	Lama glama	Ruminant	Foregut	Camel_2	16	Lucerne hay & pelleted lucerne	Respiration chamber	LG3	Manchada			1	110	2292.86	2.29286	67.5045	10.8339	89.1661	15.3516	31.6358	49.0115	36.4983	7.96248	18288.8	2044.45	1123.76	836.855	41933.7	1234.58	58.3459	61.1324	63.6865	51.2607	48.7863	57.8006	1337.79	1249.82	576.049	408.271	16.9596	24237.9	713.593	51.1272	0.464793	36.6071	1970.96	4.70017
Dittmann et al. (2014, 2015)	PLoS One / J Comp Physiol B	Llama	Lama glama	Ruminant	Foregut	Camel_2	16	Lucerne hay & pelleted lucerne	Respiration chamber	LG4	Chacha			1	140	2418.05	2.41805	59.4114	10.7681	89.2319	15.5924	32.1635	49.7661	36.399	7.56435	18342.9	2157.68	1203.37	880.147	44354.1	1089.78	54.492	56.9475	63.667	45.5508	42.1647	54.4113	1317.65	1228.74	548.146	371.111	13.4679	24133.6	592.962	48.0813	0.343438	34.4262	1853.54	4.17895
Nielsen et al. (2014)	Arch Anim Nutr	Llama	Lama glama	Ruminant	Foregut	Camel_2	16	Grass hay and straw	Respiration chamber	both diets				6	134.7	1346.3	1.3463	34.05	5.5	94.5	10.65		69.3	39.95	5.85		1272.26	932.988	537.848	25163.5	636.422	51.7					51.6	696.039					12984.4	328.394	31.8	0.23608	24.1998	1258.18	5
Vernet et al. (1997)	Ann Zootech	Llama	Lama glama	Ruminant	Foregut	Camel_2	16	Lucerne hay	Respiration chamber					6	100.8	1180.24	1.18024	37.1	8.1	91.9	8.6		67.8	39.4		18040	1084.64	800.201	465.013	21346.1	671	48	51.5		51.9	47.1	48.5	566.514	558.589	415.304	219.021	13.0548	10307.2	324	32.8051	0.325448	24.9647	1297.94	6.1
von Engelhardt and Schneider (1977)	Anim Res Dev	Llama	Lama glama	Ruminant	Foregut	Camel_2	16	Grass hay	Respiration chamber	LI	20% less			1	150	1151	1.151	26.8539	12.4	87.6	11.2	27.1				17710.2	1008.28			20360.4	475.027		63.2	47.7			59		637.23				12012.6	280.266	32.9346	0.219564	25.0632	1303.07	6.4
von Engelhardt and Schneider (1977)	Anim Res Dev	Llama	Lama glama	Ruminant	Foregut	Camel_2	16	Grass hay	Respiration chamber	LI	ad lib			1	150	1482	1.482	34.5764	12.4	87.6	11.2	27.1				17710.2	1298.23			26213.6	611.586		63.2	47.7			59		820.483				15466	360.836	43.7276	0.291517	33.2767	1730.09	6.6
von Engelhardt and Schneider (1977)	Anim Res Dev	Llama	Lama glama	Ruminant	Foregut	Camel_2	16	Grass hay	Respiration chamber	LI	40% less			1	150	950	0.95	22.1644	12.4	87.6	11.2	27.1				17710.2	832.2			16805.8	392.095		63.2	47.7			59		525.95				9915.43	231.336	29.7333	0.198222	22.6271	1176.41	7
von Engelhardt and Schneider (1977)	Anim Res Dev	Llama	Lama glama	Ruminant	Foregut	Camel_2	16	Grass hay	Respiration chamber	LII	ad lib			1	90	1124	1.124	38.4667	12.4	87.6	11.2	27.1				17710.2	984.624			19883.1	680.46		63.2	47.7			59		622.282				11731	401.471	37.6905	0.418783	28.6825	1491.23	7.5
von Engelhardt and Schneider (1977)	Anim Res Dev	Llama	Lama glama	Ruminant	Foregut	Camel_2	16	Grass hay	Respiration chamber	LII	20% less			1	90	827	0.827	28.3024	12.4	87.6	11.2	27.1				17710.2	724.452			14624.5	500.494		63.2	47.7			59		457.854				8628.45	295.291	28.8311	0.320346	21.9405	1140.71	7.8
von Engelhardt and Schneider (1977)	Anim Res Dev	Llama	Lama glama	Ruminant	Foregut	Camel_2	16	Grass hay	Respiration chamber	LII	40% less			1	90	660	0.66	22.5872	12.4	87.6	11.2	27.1				17710.2	578.16			11781.7	403.204		63.2	47.7			59		365.397				6951.18	237.89	24.7156	0.274617	18.8085	977.877	8.3
Dittmann et al. (2014, 2015)	PLoS One / J Comp Physiol B	Bactrian camel	Camelus bactrianus	Ruminant	Foregut	Camel_3	17	Lucerne hay & pelleted lucerne	Respiration chamber	CB5	Brunte			1	590	9386.6	9.3866	78.4096	10.0947	89.9053	18.2227	37.775	51.5839	42.9418	9.57389	17802.1	8439.04	4841.97	4030.77	167101	1395.85	56.7924	58.0747	70.9752	45.1866	47.0592	53.2685	5330.87	4900.95	2187.92	1896.85	18.2765	89012.2	743.55	154.21	0.261374	110.415	5944.81	3.55762
Dittmann et al. (2014, 2015)	PLoS One / J Comp Physiol B	Bactrian camel	Camelus bactrianus	Ruminant	Foregut	Camel_3	17	Lucerne hay & pelleted lucerne	Respiration chamber	CB3	Sambal			1	640	8556.85	8.55685	67.2479	10.0699	89.9301	18.3188	37.6069	51.205	42.4658	9.25512	17841.7	7695.18	4381.54	3633.73	152669	1199.82	55.5311	56.3057	72.1029	41.01	44.1449	52.6735	4751.71	4332.83	1796.87	1604.11	14.1215	80415.8	631.985	117.801	0.184064	84.3456	4541.23	2.97457
Dittmann et al. (2014, 2015)	PLoS One / J Comp Physiol B	Bactrian camel	Camelus bactrianus	Ruminant	Foregut	Camel_3	17	Lucerne hay & pelleted lucerne	Respiration chamber	CB4	Gambai			1	600	9293.8	9.2938	76.662	10.0708	89.9292	18.0497	37.8568	51.6019	42.7197	9.34946	17856.4	8357.84	4795.78	3970.29	165954	1368.91	54.0459	55.6484	68.7468	41.411	43.3918	50.9648	5022.91	4651	1985.98	1722.78	16.3818	84578.1	697.661	185.523	0.309205	132.834	7151.9	4.30957
Dittmann et al. (2014, 2015)	PLoS One / J Comp Physiol B	Bactrian camel	Camelus bactrianus	Ruminant	Foregut	Camel_3	17	Lucerne hay & pelleted lucerne	Respiration chamber	CB1	Hemangi			1	760	7917.93	7.91793	54.7018	10.5774	89.4226	16.2388	38.3476	52.3506	39.6677	8.00123	17988.5	7080.41	4145.08	3140.86	142432	984.004	53.447	54.8294	71.0995	40.8624	39.007	51.8552	4231.89	3882.15	1693.78	1225.15	11.7016	73858.3	510.257	154.491	0.203277	110.615	5955.62	4.18138
Dittmann et al. (2014, 2015)	PLoS One / J Comp Physiol B	Bactrian camel	Camelus bactrianus	Ruminant	Foregut	Camel_3	17	Lucerne hay & pelleted lucerne	Respiration chamber	CB2	Tengri			1	700	7487.14	7.48714	55.0164	10.5087	89.4913	16.4907	37.4827	51.555	39.5222	7.84566	17902.9	6700.34	3859.99	2959.09	134042	984.956	50.9945	52.3382	65.909	39.1013	36.7197	48.4533	3818.03	3506.84	1509.31	1086.57	11.0906	64947.7	477.244	131.267	0.187524	93.9869	5060.33	3.77519
Dansen et al. (2015)	J Anim Sci	Domestic horse	Equus ferus caballus	Nonruminant	Hindgut	Hindgut_1	18	Grass hay	Respiration chamber					4	235.937	5000	5	83.0565	8.6	91.4	7.8		61.6	34.2	4.4	17110	4570	3080	1710	86447.2	1436	45.7	47.2	88.5	38.9	35.6	43.1	2285	2157.04	1198.12	608.76	19.9023	37258.7	618.916	29.8	0.126305	22.6778	1179.04	1.37
Franz et al. (2010)	Evol Ecol Res	Domestic horse	Equus ferus caballus	Nonruminant	Hindgut	Hindgut_1	18	Gras hay	Respiration chamber	pony 2				1	101	2722.4	2.7224	85.4497	19.72	80.28	5.75		58.19	32.59	4.58	15937.2	2185.54	1584.16	887.23	43387.4	1361.83	38.6195			36.0211	32.5197	41.5993	1051.38		570.633	288.524	17.9108	18048.8	566.51	15.13	0.149802	10.8331	598.24	1.37883
Franz et al. (2010)	Evol Ecol Res	Domestic horse	Equus ferus caballus	Nonruminant	Hindgut	Hindgut_1	18	Gras hay	Respiration chamber	pony 3				1	90	1567.24	1.56724	53.6358	19.72	80.28	5.75		58.19	32.59	4.58	15937.2	1258.18	911.98	510.765	24977.5	854.804	44.6614			37.9251	35.6999	44.2523	699.954		345.869	182.343	11.8367	11053.1	378.27	8.25	0.0916667	5.907	326.205	1.306
Franz et al. (2010)	Evol Ecol Res	Domestic horse	Equus ferus caballus	Nonruminant	Hindgut	Hindgut_1	18	Gras hay	Respiration chamber	pony 1				1	101	2421.76	2.42176	76.0134	19.72	80.28	5.75		58.19	32.59	4.58	15937.2	1944.19	1409.22	789.252	38596.1	1211.44	40.9558			30.2907	25.4963	40.6765	991.853		426.864	201.23	13.3983	15699.5	492.771	16.93	0.167624	12.1219	669.412	1.73441
Nehring (1956)	Monograph	Domestic horse	Equus ferus caballus	Nonruminant	Hindgut	Hindgut_1	18	Gras hay	Respiration chamber	Peter 15					514	6418.3	6.4183	59.4563								18284.2				117353	1087.11	54.3898					51.6996	3490.9					60671.3	562.032	95.3569	0.185519	72.5666	3676.01	3.13243
Nehring (1956)	Monograph	Domestic horse	Equus ferus caballus	Nonruminant	Hindgut	Hindgut_1	18	Gras hay	Respiration chamber	Peter 53					519.95	7103.2	7.1032	65.2353								18593.2				132071	1212.93	53.535					49.9442	3802.7					65961.8	605.789	115.656	0.222436	88.0139	4458.52	3.37586
Ritzman & Benedict (1938)	Monograph	Domestic horse	Equus ferus caballus	Nonruminant	Hindgut	Hindgut_1	18	hay	Respiration chamber						408																														38.8	0.095098	29.5268	1535.13
Vermorel (1997)	INRA Prod Anim	Domestic horse	Equus ferus caballus	Nonruminant	Hindgut	Hindgut_1	18	foin ou herbe	Respiration chamber						220																														38	0.172727	28.918	1503.48
Vermorel (1997)	INRA Prod Anim	Domestic horse	Equus ferus caballus	Nonruminant	Hindgut	Hindgut_1	18	foin ou herbe	Respiration chamber						600																														73	0.121667	55.553	2888.26
Vermorel (1997)	INRA Prod Anim	Domestic horse	Equus ferus caballus	Nonruminant	Hindgut	Hindgut_1	18	herbe	Respiration chamber						730																														74	0.10137	56.314	2927.83
Vermorel (1997)	INRA Prod Anim	Domestic horse	Equus ferus caballus	Nonruminant	Hindgut	Hindgut_1	18	herbe	Respiration chamber						210																														78	0.371429	59.358	3086.09
Vermorel (1997)	INRA Prod Anim	Domestic horse	Equus ferus caballus	Nonruminant	Hindgut	Hindgut_1	18	herbe	Respiration chamber						850																														80	0.0941176	60.88	3165.22
Vermorel (1997)	INRA Prod Anim	Domestic horse	Equus ferus caballus	Nonruminant	Hindgut	Hindgut_1	18	herbe	Respiration chamber						360																														85	0.236111	64.685	3363.05
Vermorel (1997)	INRA Prod Anim	Domestic horse	Equus ferus caballus	Nonruminant	Hindgut	Hindgut_1	18	herbe	Respiration chamber						500																														115	0.23	87.515	4550
Vermorel (1997)	INRA Prod Anim	Domestic horse	Equus ferus caballus	Nonruminant	Hindgut	Hindgut_1	18	herbe	Respiration chamber						620																														123	0.198387	93.603	4866.53
Vermorel (1997)	INRA Prod Anim	Domestic horse	Equus ferus caballus	Nonruminant	Hindgut	Hindgut_1	18	herbe	Respiration chamber						690																														165	0.23913	125.565	6528.27
Vermorel et al. (1997)	Livestock Prod Sci 13-19	Domestic horse	Equus ferus caballus	Nonruminant	Hindgut	Hindgut_1	18	Gras hay	Respiration chamber	H	x1.15			6	208	3138	3.138	57.2935	7.9	92.1	12.6	30.9	64.1	35.1		18309.2	2890.1	2011.46	1101.44	57454.4	1049	51.5	52	64.1	49.2	47	48.2	1616.07	1502.85	989.637	517.676	18.0688	27693	505.618	30.2045	0.145214	22.9857	1195.05	2.08
Vermorel et al. (1997)	Livestock Prod Sci 13-19	Domestic horse	Equus ferus caballus	Nonruminant	Hindgut	Hindgut_1	18	Gras hay	Respiration chamber	H	x1.0			6	208	2848	2.848	51.9987	7.9	92.1	12.6	30.9	64.1	35.1		18827.4	2623.01	1825.57	999.648	53620.4	979	51.2	51.4	62.6	48.5	45.7	47.2	1458.18	1348.23	885.4	456.839	16.1656	25308.8	462.088	29.2732	0.140736	22.2769	1158.2	2.16
Vermorel et al. (1997)	Livestock Prod Sci 157-167	Domestic horse	Equus ferus caballus	Nonruminant	Hindgut	Hindgut_1	18	Grass hay	Respiration chamber	IIH2-h	H2			6	475	9075	9.075	89.1921	6.8	93.2	11.6	33.6	71.5	37.6	4.1	18468.3	8457.9	6488.62	3412.2	167600	1647.23	47.2	47.5	54.3	48.5	45.3	43.4	4283.4	4017.5	3146.98	1545.73	30.9296	72738.4	714.897	62.2698	0.131094	47.3873	2463.72	1.47
Vermorel et al. (1997)	Livestock Prod Sci 157-167	Domestic horse	Equus ferus caballus	Nonruminant	Hindgut	Hindgut_1	18	Grass hay	Respiration chamber	IIH2-l	H2			6	475	7800	7.8	76.661	6.8	93.2	11.6	33.6	71.5	37.6	4.1	18512.8	7269.6	5577	2932.8	144400	1419.21	47.5	47.2	55	48.6	44.4	43.4	3705	3431.25	2710.42	1302.16	26.6389	62669.6	615.938	55.8399	0.117558	42.4942	2209.32	1.53
Vermorel et al. (1997)	Livestock Prod Sci 157-167	Domestic horse	Equus ferus caballus	Nonruminant	Hindgut	Hindgut_1	18	Lucerne hay	Respiration chamber	IVH4	H4			8	475	7422	7.422	72.9459	8.2	91.8	14.2	35.8	50.2	37.5	7.4	18323.9	6813.4	3725.84	2783.25	136000	1336.65	56.9	57.1	71.7	42.3	40.2	51.9	4223.12	3890.45	1576.03	1118.87	15.4898	70584	693.723	59.1226	0.124469	44.9923	2339.2	1.72
Vermorel et al. (1997)	Livestock Prod Sci 157-167	Domestic horse	Equus ferus caballus	Nonruminant	Hindgut	Hindgut_1	18	Gras hay	Respiration chamber	IIIH3	H3			6	475	7726	7.726	75.9337	7.5	92.5	8.6	31.2	57.8	33.5	2.7	17848.8	7146.55	4465.63	2588.21	137900	1355.33	52.4	54.1	54.6	41.4	39.1	48.7	4048.42	3866.28	1848.77	1011.99	18.1703	67157.3	660.044	55.069	0.115935	41.9075	2178.82	1.58
Vermorel et al. (1997)	Livestock Prod Sci 157-167	Domestic horse	Equus ferus caballus	Nonruminant	Hindgut	Hindgut_1	18	Grass hay	Respiration chamber	IVH5	H5			8	475	7487	7.487	73.5847	9.9	90.1	11.9	25.4	53.2	27.8	2.6	17911	6745.79	3983.08	2081.39	134100	1317.98	55.6	58.1	59.1	52.7	47.7	52.4	4162.77	3919.3	2099.09	992.821	20.6305	70268.4	690.621	73.2097	0.154126	55.7126	2896.56	2.16
Franz et al. (2011ab)	Comp Biochem Physiol A / J Anim Physiol Anim Nutr	Rabbit	Oryctolagus cuniculus	Nonruminant	Hindgut	Lag_1	19	Grass hay	Respiration chamber	Ka1				1	1.191	55.9211	0.0559211	49.0503	6.61638	93.3836	6.78902		60.2383	32.2889	2.22048	15968.4	52.2211	33.6859	18.0563	892.972	783.257	50.907	51.5208	35.0635	36.6777	26.4417	43.9169	28.4677	26.9048	12.3552	4.7744	10.8372	392.166	343.982	0.075	0.0629723	0.057075	2.96739	0.332305
Franz et al. (2011ab)	Comp Biochem Physiol A / J Anim Physiol Anim Nutr	Rabbit	Oryctolagus cuniculus	Nonruminant	Hindgut	Lag_1	19	Grass hay	Respiration chamber	Ka4				1	2.068	75.3821	0.0753821	43.7125	6.7429	93.2571	7.09033		62.698	34.1936	2.2005	16506.9	70.2991	47.263	25.7759	1244.32	721.556	52.2875	53.0279	41.5229	40.1567	30.5668	48.3417	39.4154	37.2781	18.9793	7.87885	11.0057	601.526	348.812	0.126374	0.0611091	0.0961703	5.00001	0.401825
Franz et al. (2011ab)	Comp Biochem Physiol A / J Anim Physiol Anim Nutr	Rabbit	Oryctolagus cuniculus	Nonruminant	Hindgut	Lag_1	19	Grass hay	Respiration chamber	Ka5				1	1.75	82.7968	0.0827968	54.4171	7.01578	92.9842	7.22531		62.5926	35.4229	2.40969	16490.2	76.988	51.8247	29.3291	1365.34	897.351	50.405	51.4975	37.4684	37.1115	31.536		41.7338	39.6469	19.2329	9.24921	12.6406			0.195	0.111429	0.148395	7.71523	0.565077
Franz et al. (2011ab)	Comp Biochem Physiol A / J Anim Physiol Anim Nutr	Rabbit	Oryctolagus cuniculus	Nonruminant	Hindgut	Lag_1	19	Grass hay	Respiration chamber	Ka2				1	1.408	55.6359	0.0556359	43.043	6.87436	93.1256	6.76266		59.3187	31.729	2.23446	16191.7	51.8113	33.0025	17.6527	900.84	696.94	62.5002	62.5266	49.6503	47.618	41.0243	56.7279	34.7725	32.3958	15.7151	7.24191	12.1581	511.028	395.36	0.185	0.131392	0.140785	7.31957	0.812528
Franz et al. (2011ab)	Comp Biochem Physiol A / J Anim Physiol Anim Nutr	Rabbit	Oryctolagus cuniculus	Nonruminant	Hindgut	Lag_1	19	Grass hay	Respiration chamber	Ka6				1	1.368	71.2183	0.0712183	56.3024	6.70936	93.2906	6.83996		60.0844	30.5966	1.75495	16175.9	66.44	42.7911	21.7904	1152.02	910.74	51.2333	52.0648	35.4051	40.3046	21.9009		36.4875	34.5919	17.2468	4.7723	13.6346			0.335	0.244883	0.254935	13.2544	1.15053
Franz et al. (2011ab)	Comp Biochem Physiol A / J Anim Physiol Anim Nutr	Rabbit	Oryctolagus cuniculus	Nonruminant	Hindgut	Lag_1	19	Grass hay	Respiration chamber	Ka3				1	1.626	74.698	0.074698	51.8763	6.61872	93.3813	6.83489		62.8783	34.6177	2.45037	16395.8	69.754	46.9688	25.8588	1224.74	850.555	63.9574	65.9264	23.2732	63.3339	50.6803		47.7749	45.9863	29.7472	13.1053	20.6588			0.31	0.190652	0.23591	12.2652	1.00146
This study		Giant rabbit	Oryctolagus cuniculus	Nonruminant	Hindgut	Lag_2	20	Lucerne hay & pelleted lucerne	Respiration chamber	RK1				1	6.7	236.128	0.236128	56.7012	11.2627	88.7373	16.3386	36.2043	53.2289	38.3361	10.2755	18596.8	209.534	125.689	90.5224	4391.24	1054.46	57.6278	55.5113	65.0573	42.8603	35.5669	54.3029	136.076	116.315	53.8705	32.1961	12.9359	2384.57	572.604	1.846	0.275522	1.40481	73.0375	1.66325
This study		Giant rabbit	Oryctolagus cuniculus	Nonruminant	Hindgut	Lag_2	20	Lucerne hay & pelleted lucerne	Respiration chamber	RK2				1	7.7	260.105	0.260105	56.2706	10.1807	89.8193	15.3014	38.2201	55.358	44.2116	10.9822	18625	233.625	143.989	114.997	4844.45	1048.04	57.9802	55.9198	68.7636	39.089	40.6235	55.4082	150.81	130.643	56.2839	46.7156	12.1763	2684.22	580.698	1.775	0.230519	1.35078	70.2283	1.44967
This study		Giant rabbit	Oryctolagus cuniculus	Nonruminant	Hindgut	Lag_2	20	Lucerne hay & pelleted lucerne	Respiration chamber	RK4				1	7.8	278.064	0.278064	59.5763	10.0646	89.9354	14.7404	38.474	55.6599	43.4	11.2995	18569.4	250.078	154.77	120.68	5163.48	1106.3	56.0595	54.3872	58.9846	40.2094	40.9589	52.4847	155.881	136.01	62.2321	49.429	13.3335	2710.04	580.637	2.213	0.283718	1.68409	87.5579	1.69571
This study		Giant rabbit	Oryctolagus cuniculus	Nonruminant	Hindgut	Lag_2	20	Lucerne hay & pelleted lucerne	Respiration chamber	RK3				1	6.5	253.609	0.253609	62.2988	10.4625	89.5375	15.2231	38.2168	55.1871	42.9114	10.4536	18637.4	227.075	139.96	108.827	4726.62	1161.09	56.3278	54.3193	59.9793	40.1075	39.5342	53.1951	142.852	123.346	56.1342	43.024	13.7893	2514.33	617.643	1.848	0.284308	1.40633	73.1166	1.54691
Benedict (1936)	Monograph	Indian elephant	Elephas maximus	Nonruminant	Hindgut	Hindgut_2	26	? Grass hay ?	Respiration chamber					1	3672																														742	0.20207	564.662	8917.88
von Engelhardt et al. (1978)	Comp Biochem Physiol	Tammar wallaby	Macropus eugenii	Nonruminant	Foregut	Macropod_1	27	Pelleted wheaten hay	Respiration chamber					2	4.55																														0.15288	0.0336	0.116342	6.04874
von Engelhardt et al. (1978)	Comp Biochem Physiol	Tammar wallaby	Macropus eugenii	Nonruminant	Foregut	Macropod_1	27	Chopped lucerne	Respiration chamber					2	6																														0.936	0.156	0.712296	37.0331
von Engelhardt et al. (1978)	Comp Biochem Physiol	Tammar wallaby	Macropus eugenii	Nonruminant	Foregut	Macropod_1	27	Chopped lucerne	Respiration chamber					1	4.4																														1.09824	0.2496	0.835761	43.4522
von Engelhardt et al. (1978)	Comp Biochem Physiol	Tammar wallaby	Macropus eugenii	Nonruminant	Foregut	Macropod_1	27	Pelleted lucerne	Respiration chamber					2	5.4																														1.4256	0.264	1.08488	56.4042
Madsen and Bertelsen (2012)	J Anim Sci	Red-necked wallaby	Macropus rufogriseus	Nonruminant	Foregut	Macropod_2	28	Grass hay & concentrates	Respiration chamber					1	18.5																														1.03	0.0556757	0.78383	40.7522
Madsen and Bertelsen (2012)	J Anim Sci	Red-necked wallaby	Macropus rufogriseus	Nonruminant	Foregut	Macropod_2	28	Grass hay	Respiration chamber					1	14				8.7	91.3	15.1																								1.12	0.08	0.85232	44.3131
Madsen and Bertelsen (2012)	J Anim Sci	Red-necked wallaby	Macropus rufogriseus	Nonruminant	Foregut	Macropod_2	28	Grass hay & concentrates	Respiration chamber					1	16.6																														1.39	0.0837349	1.05779	54.9957
Madsen and Bertelsen (2012)	J Anim Sci	Red-necked wallaby	Macropus rufogriseus	Nonruminant	Foregut	Macropod_2	28	Grass hay	Respiration chamber					1	17.5				8.7	91.3	15.1																								1.42	0.0811429	1.08062	56.1827
Madsen and Bertelsen (2012)	J Anim Sci	Red-necked wallaby	Macropus rufogriseus	Nonruminant	Foregut	Macropod_2	28	Grass hay & concentrates	Respiration chamber					1	14																														1.47	0.105	1.11867	58.1609
Madsen and Bertelsen (2012)	J Anim Sci	Red-necked wallaby	Macropus rufogriseus	Nonruminant	Foregut	Macropod_2	28	Grass hay	Respiration chamber					1	13.5				8.7	91.3	15.1																								1.49	0.11037	1.13389	58.9522
Madsen and Bertelsen (2012)	J Anim Sci	Red-necked wallaby	Macropus rufogriseus	Nonruminant	Foregut	Macropod_2	28	Grass hay & concentrates	Respiration chamber					1	14																														1.79	0.127857	1.36219	70.8218
Madsen and Bertelsen (2012)	J Anim Sci	Red-necked wallaby	Macropus rufogriseus	Nonruminant	Foregut	Macropod_2	28	Grass hay & concentrates	Respiration chamber					1	16																														1.93	0.120625	1.46873	76.361
Madsen and Bertelsen (2012)	J Anim Sci	Red-necked wallaby	Macropus rufogriseus	Nonruminant	Foregut	Macropod_2	28	Grass hay & concentrates	Respiration chamber					1	20																														1.99	0.0995	1.51439	78.7349
Madsen and Bertelsen (2012)	J Anim Sci	Red-necked wallaby	Macropus rufogriseus	Nonruminant	Foregut	Macropod_2	28	Grass hay	Respiration chamber					1	17				8.7	91.3	15.1																								2.23	0.131176	1.69703	88.2305
Madsen and Bertelsen (2012)	J Anim Sci	Red-necked wallaby	Macropus rufogriseus	Nonruminant	Foregut	Macropod_2	28	Grass hay & concentrates	Respiration chamber					1	13.5																														2.44	0.180741	1.85684	96.5392
Madsen and Bertelsen (2012)	J Anim Sci	Red-necked wallaby	Macropus rufogriseus	Nonruminant	Foregut	Macropod_2	28	Grass hay & concentrates	Respiration chamber					1	17.5																														2.53	0.144571	1.92533	100.1
Vendl et al. (2015) & this study	J Exp Biol	Red kangaroo	Macropus rufus	Nonruminant	Foregut	Macropod_3	29	Alfalfa hay	Respiration chamber	Ad libitum	Nahla			1	21.1	378.163	0.378163	38.412	9.96137	90.0386	21.2953		47.2313			19084.7	340.493	178.611		7217.12	733.082	47.5494	49.5385	66.784	31.7087		47.8317	179.814	168.675	56.6352		5.75274	3452.07	350.646	2.86	0.135545	2.17646	113.17	1.56808
Vendl et al. (2015) & this study	J Exp Biol	Red kangaroo	Macropus rufus	Nonruminant	Foregut	Macropod_3	29	Alfalfa hay	Respiration chamber	Restricted	Nahla			1	19.3	239.296	0.239296	25.9877	9.38217	90.6178	21.4595		50.8558	32.0392	9.3613	18937.2	216.845	121.696	76.6687	4531.61	492.135	62.6822	64.3803	72.1433	55.3611		62.3925	149.996	139.605	67.3722		7.31666	2827.38	307.055	3.72	0.192746	2.83092	150.762	3.32689
Vendl et al. (2015) & this study	J Exp Biol	Red kangaroo	Macropus rufus	Nonruminant	Foregut	Macropod_3	29	Alfalfa hay	Respiration chamber	Restricted	Alaska			1	25.8	225.072	0.225072	19.6611	9.38217	90.6178	21.4595		50.8558	32.0392	9.3613	18937.2	203.956	114.462	72.1115	4262.24	372.326	63.7161	65.5265	79.4526	55.7123		62.2767	143.407	133.645	63.7696		5.57056	2654.38	231.872	5.44	0.210853	4.13984	103.673	2.43237
Vendl et al. (2015) & this study	J Exp Biol	Red kangaroo	Macropus rufus	Nonruminant	Foregut	Macropod_3	29	Alfalfa hay	Respiration chamber	Restricted	Ginger			1	24	249.845	0.249845	23.0416	9.56603	90.434	20.5378		47.4442	31.2435	8.27248	18784.1	225.945	118.537	78.0604	4693.13	432.817	72.0367	74.1777	78.5829	70.0155		72.0474	179.98	167.601	82.9943		7.65403	3381.28	311.833	2.55	0.10625	1.94055	143.243	3.05219
Vendl et al. (2015) & this study	J Exp Biol	Red kangaroo	Macropus rufus	Nonruminant	Foregut	Macropod_3	29	Alfalfa hay	Respiration chamber	Restricted	Velvet			1	23.8	196.341	0.196341	18.2212	9.56603	90.434	20.5378		47.4442	31.2435	8.27248	18784.1	177.559	93.1522	61.3436	3688.09	342.27	62.2341	64.4938	77.2503	48.2946		61.8623	122.191	114.514	44.9875		4.17503	2281.53	211.736	2.59	0.108824	1.97099	73.2045	1.98489
Vendl et al. (2015) & this study	J Exp Biol	Red kangaroo	Macropus rufus	Nonruminant	Foregut	Macropod_3	29	Alfalfa hay	Respiration chamber	Ad libitum	Velvet			1	16.25	267.648	0.267648	33.0693	9.90036	90.0996	21.7593		45.7691			18787.8	241.15	122.5		5028.52	621.298	53.3533	55.2424	70.2335	39.8634		51.6563	142.799	133.217	48.8328		6.03353	2597.54	320.939	2.34	0.144	1.78074	92.5938	1.84137
Vendl et al. (2015) & this study	J Exp Biol	Red kangaroo	Macropus rufus	Nonruminant	Foregut	Macropod_3	29	Alfalfa hay	Respiration chamber	Ad libitum	Ginger			1	11.85	282.111	0.282111	44.1704	9.95534	90.0447	21.9046		44.9893			18748.1	254.026	126.92		5289.04	828.111	59.2835	61.5179	73.1437	48.4834		57.4298	167.245	156.271	61.5351		9.6346	3037.49	475.582	3.3	0.278481	2.5113	130.581	2.4689
Vendl et al. (2015) & this study	J Exp Biol	Red kangaroo	Macropus rufus	Nonruminant	Foregut	Macropod_3	29	Alfalfa hay	Respiration chamber	Ad libitum	Alaska			1	21.5	612.046	0.612046	61.2993	9.58544	90.4146	20.1254		48.8671			18952.5	553.379	299.089		11599.8	1161.77	63.7079	65.1237	75.6834	55.2749		62.7344	389.921	360.381	165.321		16.5577	7277.08	728.833	1.9	0.0883721	1.4459	75.183	0.64814
Vendl et al. (2015) & this study	J Exp Biol	Western grey kangaroo	Marcopus fuliginosus	Nonruminant	Foregut	Macropod_4	30	Alfalfa hay	Respiration chamber	Ad libitum	Lilly			1	19.05	315.419	0.315419	34.5912	10.1498	89.8502	22.2819		47.4705			18904	283.404	149.731		5962.68	653.914	62.776	43.7562	75.9268	53.347		60.8527	198.007	124.007	79.877		8.75992	3628.45	397.924	2.41	0.126509	1.83401	102.486	1.7188
Vendl et al. (2015) & this study	J Exp Biol	Western grey kangaroo	Marcopus fuliginosus	Nonruminant	Foregut	Macropod_4	30	Alfalfa hay	Respiration chamber	Ad libitum	Sprouts			1	20.7	332.634	0.332634	34.2759	9.94424	90.0558	21.8453		49.8874			18821.3	299.556	165.942		6260.62	645.119	55.385	56.1476	73.7147	40.899		53.2421	184.229	168.193	67.8688		6.99346	3333.29	343.475	2.62	0.12657	1.99382	100.903	1.61172
Vendl et al. (2015) & this study	J Exp Biol	Western grey kangaroo	Marcopus fuliginosus	Nonruminant	Foregut	Macropod_4	30	Alfalfa hay	Respiration chamber	Restricted	Lilly			1	23.5	249.845	0.249845	23.4083	9.83058	90.1694	20.2625		52.6668	32.2736	8.02133	18846.9	225.284	131.586	80.6341	4708.8	441.174	65.9357	67.0189	73.4483	59.5596		64.5774	164.737	150.983	78.3718		7.34276	3040.82	284.899	1.97	0.0838298	1.49917	77.9529	1.65547
Vendl et al. (2015) & this study	J Exp Biol	Western grey kangaroo	Marcopus fuliginosus	Nonruminant	Foregut	Macropod_4	30	Alfalfa hay	Respiration chamber	Restricted	Tilly			1	19.4	219.781	0.219781	23.776	9.6997	90.3003	19.8153		51.1458	32.0707	7.87904	19116.7	198.462	112.408	70.4852	4201.48	454.518	63.5698	64.3069	77.1807	54.9818		61.411	139.714	127.625	61.8042		6.68601	2580.17	279.124	3.42	0.176289	2.60262	135.329	3.22099
Vendl et al. (2015) & this study	J Exp Biol	Western grey kangaroo	Marcopus fuliginosus	Nonruminant	Foregut	Macropod_4	30	Alfalfa hay	Respiration chamber	Ad libitum	Tilly			1	16.1	354.923	0.354923	44.1585	9.43709	90.5629	20.9606		47.1454			18832.6	321.428	167.33		6684.14	831.622	75.632	76.5604	82.9465	67.5873		74.2143	268.435	246.087	113.094		14.0708	4960.58	617.182	1.85	0.114907	1.40785	147.2	2.20224
Vendl et al. (2015) & this study	J Exp Biol	Western grey kangaroo	Marcopus fuliginosus	Nonruminant	Foregut	Macropod_4	30	Alfalfa hay	Respiration chamber	Ad libitum	Eve			1	11.2	384.007	0.384007	62.7228	10.0868	89.9132	19.666		48.113			18725.1	345.273	184.757		7190.56	1174.49	59.7298	60.6987	69.9845	49.9523		55.7981	229.367	209.576	92.2904		15.0745	4012.2	655.343	3.62	0.323214	2.75482	71.226	0.990548
Vendl et al. (2015) & this study	J Exp Biol	Western grey kangaroo	Marcopus fuliginosus	Nonruminant	Foregut	Macropod_4	30	Alfalfa hay	Respiration chamber	Restricted	Ivy			1	19.05	229.851	0.229851	25.2072	9.97704	90.023	19.2418		48.9877	33.2707	7.93154	18694.2	206.919	112.599	76.4731	4296.87	471.228	57.9837	59.6522	69.6501	47.6771		55.4895	133.276	123.432	53.6838		5.88738	2384.31	261.482	2.37	0.124409	1.80357	93.7809	2.18254
Vendl et al. (2015) & this study	J Exp Biol	Western grey kangaroo	Marcopus fuliginosus	Nonruminant	Foregut	Macropod_4	30	Alfalfa hay	Respiration chamber	Restricted	Eve			1	19.05	229.851	0.229851	25.2072	9.97704	90.023	19.2418		48.9877	33.2707	7.93154	18694.2	206.919	112.599	76.4731	4296.87	471.228	59.0785	59.7447	72.4478	46.2782		56.0378	135.793	123.623	52.1086		5.71463	2407.87	264.066	2.53	0.132808	1.92533	100.112	2.32988
Vendl et al. (2015) & this study	J Exp Biol	Western grey kangaroo	Marcopus fuliginosus	Nonruminant	Foregut	Macropod_4	30	Alfalfa hay	Respiration chamber	Ad libitum	Ivy			1	21.05	434.025	0.434025	44.1648	9.94935	90.0506	19.0782		49.458			18643.1	390.843	214.66		8091.57	823.368	56.0602	57.4466	67.278	45.3039		53.5121	243.315	224.526	97.2494		9.89573	4329.97	440.602	3.81	0.180998	2.89941	95.3637	1.17856
Vendl et al. (2015) & this study	J Exp Biol	Western grey kangaroo	Marcopus fuliginosus	Nonruminant	Foregut	Macropod_4	30	Alfalfa hay	Respiration chamber	Restricted	Beetroot			1	24.9	264.717	0.264717	23.7483	9.6997	90.3003	19.8153		51.1458	32.0707	7.87904	19116.7	239.04	135.392	84.8967	5060.52	453.989	56.9541	58.498	70.3417	48.4609		55.4126	150.767	139.834	65.612		5.88618	2804.17	251.568	5.68	0.228112	4.32248	224.758	4.44139
Vendl et al. (2015) & this study	J Exp Biol	Western grey kangaroo	Marcopus fuliginosus	Nonruminant	Foregut	Macropod_4	30	Alfalfa hay	Respiration chamber	Restricted	Sprouts			1	24.5	237.004	0.237004	21.5219	9.75753	90.2425	20.0303		53.144			18815.7	213.878	125.953		4459.38	404.949	64.6913	65.48	77.688	56.4064		62.8565	153.321	140.047	71.0457		6.45154	2803.01	254.537	2.34	0.0955102	1.78074	92.5938	2.07638
Vendl et al. (2015) & this study	J Exp Biol	Western grey kangaroo	Marcopus fuliginosus	Nonruminant	Foregut	Macropod_4	30	Alfalfa hay	Respiration chamber	Ad libitum	Beetroot			1	19.05	628.762	0.628762	68.9549	9.35781	90.6422	20.6775		48.2082			18858.4	569.924	303.115		11857.4	1300.38	65.4585	67.3359	73.682	58.7676		63.9505	411.578	383.763	178.134		19.5355	7582.88	831.597	1.8	0.0944882	1.3698	215.261	1.81541
Vendl et al. (2016) & this study	Comp Biochem Physiol A	Collared peccary	Pecari tajacu	Nonruminant	Foregut	Foregut_3	32	Lucerne pellets & 17% dog biscuits	Respiration chamber	Pek3				1	17	446.021	0.446021	53.2744	10.564	89.436	16.8434	23.3777	37.4445	28.1881	8.08092	17329.2	398.903	167.011	125.725	7729.17	923.201	55.1209	58.0902	94.4326	37.2327	30.8375	54.9908	245.851	231.724	62.1825	38.7704	7.42731	4250.33	507.675	7.16008	0.421181	5.44882	283.29	3.50844
Vendl et al. (2016) & this study	Comp Biochem Physiol A	Collared peccary	Pecari tajacu	Nonruminant	Foregut	Foregut_3	32	Lucerne pellets & 17% dog biscuits	Respiration chamber	Pek4				1	15.5	315.707	0.315707	40.4143	10.3815	89.6185	17.042	22.4566	36.4086	27.1888	7.87954	17366.2	282.932	114.944	85.837	5482.64	701.844	42.3855	46.5117	93.3415	16.476	5.74685	42.8494	133.814	131.596	18.9382	4.93292	2.42432	2349.28	300.736	6.94288	0.447928	5.28353	274.697	4.79297
Vendl et al. (2016) & this study	Comp Biochem Physiol A	Collared peccary	Pecari tajacu	Nonruminant	Foregut	Foregut_3	32	Lucerne pellets & 17% dog biscuits	Respiration chamber	Pek2				1	18	508.678	0.508678	58.2087	10.8416	89.1584	15.1764	24.7791	39.0205	29.7082	8.38727	17272.8	453.529	198.489	151.119	8786.27	1005.43	51.2842	54.3742	81.5406	31.7579	25.9974	51.0218	260.871	246.603	63.0359	39.2871	7.21329	4482.91	512.986	9.00959	0.500533	6.8563	356.467	3.88727
Vendl et al. (2016) & this study	Comp Biochem Physiol A	Collared peccary	Pecari tajacu	Nonruminant	Foregut	Foregut_3	32	Lucerne pellets & 17% dog biscuits	Respiration chamber	Pek6				1	18.5	504.255	0.504255	56.529	10.7865	89.2135	16.6013	24.5007	38.7074	29.4063	8.32641	17284	449.863	195.184	148.282	8715.52	977.045	45.8274	49.5731	93.7695	25.0769	14.5921	46.6087	231.087	223.011	48.9462	21.6374	5.48706	4062.19	455.388	8.72598	0.471674	6.64047	345.245	3.79474
Vendl et al. (2016) & this study	Comp Biochem Physiol A	Pygmy hippo	Hexaprotodon liberiensis	Nonruminant	Foregut	Foregut_2	33	Lucerne hay & lucerne pellets	Respiration chamber	hippoM1				1	220	3845.65	3.84565	67.3213	13.6813	86.3187	13.7993	29.2158	47.277	36.2461	8.65273	17661.6	3319.51	1818.11	1393.9	67920.4	1189	40.2796	41.8822	59.3926	19.965	12.7497	41.5299	1549.01	1390.29	362.984	177.717	6.35434	28207.3	493.792	82.2128	0.373695	62.5639	3252.77	4.78966
Vendl et al. (2016) & this study	Comp Biochem Physiol A	Pygmy hippo	Hexaprotodon liberiensis	Nonruminant	Foregut	Foregut_2	33	Lucerne hay & lucerne pellets	Respiration chamber	hippoM2				1	221	3783.49	3.78349	66.0084	12.0785	87.9215	15.9702	31.1493	48.3999	37.3922	8.65989	17782.3	3326.51	1831.21	1414.73	67279.4	1173.78	53.6911	56.7943	67.1864	44.7714	39.9801	54.6402	2031.4	1889.27	819.857	565.611	14.3035	36761.6	641.358	87.3809	0.395388	66.4968	3457.25	5.13926
Vendl et al. (2016) & this study	Comp Biochem Physiol A	Pygmy hippo	Hexaprotodon liberiensis	Nonruminant	Foregut	Foregut_2	33	Lucerne hay & lucerne pellets	Respiration chamber	hippoJad2				1	240	3694.98	3.69498	60.5973	9.82657	90.1734	16.8076	37.3282	51.0202	41.7954	9.80536	17661.7	3331.89	1885.18	1544.33	65259.8	1070.25	62.1921	64.5668	78.0741	53.2709	54.1902	61.8991	2297.98	2151.29	1004.25	836.875	16.4697	40395.2	662.478	52.3764	0.218235	39.8584	2072.29	3.17582
Vendl et al. (2016) & this study	Comp Biochem Physiol A	Pygmy hippo	Hexaprotodon liberiensis	Nonruminant	Foregut	Foregut_2	33	Lucerne hay & lucerne pellets	Respiration chamber	hippoJad1				1	235	3900.95	3.90095	64.9935	9.25184	90.7482	15.7741	38.4121	54.2511	43.5637	10.0858	17713.8	3540.04	2116.31	1699.4	69100.6	1151.28	57.6285	60.3564	73.91	50.2346	49.4065	56.2569	2248.06	2136.64	1063.12	839.614	17.7126	38873.9	647.675	64.4851	0.274405	49.0732	2551.37	3.6927
Kiani et al. (2019)	Zoo Biol	Capybara	Hydrochoerus hydrochaeris	Nonruminant	Hindgut	Rod_hyst_4	34	Pelleted lucerne & salda	Respiration chamber	Animal I				1	32	937.768	0.937768	69.7	17	83	13.8	38.9	52.5	43.2	9.8	16800	778.347	492.328	405.116	15754.5	1170.96	56	57	58	47	51	55	525.15	443.658	231.394	206.609	17.1985	8664.97	644.028	13.7	0.428125	10.4257	542.044	3.44057
Hagen et al. (2019)	J Anim Feed Sci	Indian crested porcupine	Hystrix indica	Nonruminant	Hindgut	Rod_hyst_5	35	Pelleted lucerne	Respiration chamber	Porcupine1				1	13.05	475.578	0.475578	69.265	12.3726	87.6274	15.48	30.86	49.15	35.97		17965.4	416.737	233.747	171.065	8543.95	1244.37	51.3752	51.8459		40.0584		49.8441	244.329	216.061	93.6351		13.6374	4258.66	620.247	8.15132	0.624622	6.20315	322.548	3.77516
Hagen et al. (2019)	J Anim Feed Sci	Indian crested porcupine	Hystrix indica	Nonruminant	Hindgut	Rod_hyst_5	35	Pelleted lucerne	Respiration chamber	Porcupine2				1	17.05	428.763	0.428763	51.1003	12.3726	87.6274	15.48	30.86	49.15	35.97		17965.4	375.713	210.737	154.226	7702.89	918.037	47.3678	48.089		32.6584		45.7037	203.096	180.677	68.8233		8.20242	3520.51	419.577	7.96169	0.466961	6.05884	315.044	4.08995
Hagen et al. (2019)	J Anim Feed Sci	Indian crested porcupine	Hystrix indica	Nonruminant	Hindgut	Rod_hyst_5	35	Pelleted lucerne	Respiration chamber	Porcupine3				1	18.1	463.445	0.463445	52.8128	12.3726	87.6274	15.48	30.86	49.15	35.97		17965.4	406.105	227.783	166.701	8325.97	948.803	44.6444	45.9012		32.385		42.1077	206.902	186.407	73.7677		8.40635	3505.87	399.519	8.37223	0.462554	6.37127	331.289	3.97898
Hagen et al. (subm)	(subm)	Mara	Dolichotis patagonum	Nonruminant	Hindgut	Rod_hyst_3	36	Pelleted lucerne	Respiration chamber	Mara5				1	8.7	349.238	0.349238	68.9417	12.0241	87.9759	15.42	30.31	46.55	36.25		17966.1	307.245	162.57	126.599	6274.46	1238.62	59.9968	57.5993		43.8326		55.3056	209.531	176.971	71.2588		14.0669	3470.13	685.024	3.09631	0.355897	2.35629	122.521	1.95269
Hagen et al. (subm)	(subm)	Mara	Dolichotis patagonum	Nonruminant	Hindgut	Rod_hyst_3	36	Pelleted lucerne	Respiration chamber	Mara3				1	8.2	268.368	0.268368	55.3823	12.0241	87.9759	15.42	30.31	46.55	36.25		17966.1	236.099	124.925	97.2835	4821.54	995.006	53.129	50.1354		32.3766		47.016	142.581	118.369	40.4466		8.34682	2266.9	467.812	3.78616	0.461727	2.88127	149.818	3.10727
Hagen et al. (subm)	(subm)	Mara	Dolichotis patagonum	Nonruminant	Hindgut	Rod_hyst_3	36	Pelleted lucerne	Respiration chamber	Mara1				1	6.97	323.625	0.323625	75.4428	12.0241	87.9759	15.42	30.31	46.55	36.25		17966.1	284.712	150.647	117.314	5814.29	1355.42	48.0298	44.6081		21.1276		41.5282	155.436	127.005	31.8282		7.41971	2414.57	562.88	4.04821	0.580805	3.08069	160.188	2.75507
Hagen et al. (subm)	(subm)	Mara	Dolichotis patagonum	Nonruminant	Hindgut	Rod_hyst_3	36	Pelleted lucerne	Respiration chamber	Mara2				1	6.325	172.606	0.172606	43.2772	12.0241	87.9759	15.42	30.31	46.55	36.25		17966.1	151.851	80.3479	62.5695	3101.06	777.524	40.9701	36.4835				33.2869	70.7166	55.4006				1032.25	258.814	3.95667	0.62556	3.01102	156.565	5.04878
Hagen et al. (subm)	(subm)	Mara	Dolichotis patagonum	Nonruminant	Hindgut	Rod_hyst_3	36	Pelleted lucerne	Respiration chamber	Mara4				1	8.15	304.989	0.304989	63.2289	12.0241	87.9759	15.42	30.31	46.55	36.25		17966.1	268.316	141.972	110.558	5479.47	1135.98	55.3718	52.7825		37.5926		51.2398	168.878	141.624	53.3711		11.0646	2807.67	582.073	4.36374	0.535428	3.32081	172.673	3.15128
Hagen et al. (2015)	Zoo Biol	Viscacha	Lagostomus maximus	Nonruminant	Hindgut	Rod_hyst_6	37	Pelleted lucerne & lucerne hay	Respiration chamber	Viscacha3				1	6.34	142.5	0.1425	35.6655	5.82	94.18	11.62	55.02	65.51	58.55	15.31	19428.3	134.207	93.3518	83.4338	2768.53	692.919	49.6842	52.0939		49.4697	56.4905	50.4984	70.8	69.9134	46.1809	47.1321	11.5583	1398.06	349.913	1.67	0.263407	1.27087	66.074	2.4
Hagen et al. (2015)	Zoo Biol	Viscacha	Lagostomus maximus	Nonruminant	Hindgut	Rod_hyst_6	37	Pelleted lucerne & lucerne hay	Respiration chamber	Viscacha2				1	4.26	124.66	0.12466	42.0407	4.1	95.9	10.71	43.89	68.61	51.59	12.79	17793.3	119.549	85.5292	64.3121	2218.11	748.041	53.69	56.6792	37.0037	56.0089	53.5376	50.3307	66.93	67.7594	47.904	34.4311	16.1553	1116.39	376.494	2.74	0.643192	2.08514	108.409	4.9
Hagen et al. (2015)	Zoo Biol	Viscacha	Lagostomus maximus	Nonruminant	Hindgut	Rod_hyst_6	37	Pelleted lucerne & lucerne hay	Respiration chamber	Viscacha1				1	2.81	124.07	0.12407	57.1659	5.84	94.16	7.6	46.57	68.77	49.39	12.39	17882.6	116.824	85.3229	61.2782	2218.69	1022.27	61.3605	62.6894	33.1919	59.6695	56.658	58.3223	76.13	73.2364	50.9118	34.719	23.4579	1293.99	596.214	1.61	0.572954	1.22521	63.7001	2.89
Hagen et al. (2019)	Eur J Wildl Res	Nutria	Myocastor coypus	Nonruminant	Hindgut	Rod_hyst_7	38	Pelleted lucerne	Respiration chamber	Nutria1				1	1.6	51.3925	0.0513925	36.1252	12.512	87.488	15.65	30.81	49.19	35.7		17924.6	44.9623	25.28	18.3471	921.19	647.529	56.892	54.8239		41.9183		52.4874	29.2383	24.6501	10.5969		7.44887	483.509	339.871	1.63716	1.02322	1.24588	64.7824	7.03247
Hagen et al. (2019)	Eur J Wildl Res	Nutria	Myocastor coypus	Nonruminant	Hindgut	Rod_hyst_7	38	Pelleted lucerne	Respiration chamber	Nutria3				1	2	50.4624	0.0504624	30.0051	12.512	87.488	15.65	30.81	49.19	35.7		17924.6	44.1485	24.8224	18.0151	904.517	537.829	63.2667	61.4853		49.9395		59.1519	31.9259	27.1448	12.3962		7.37082	535.039	318.136	1.53157	0.765786	1.16553	60.6043	6.70019
Hagen et al. (2019)	Eur J Wildl Res	Nutria	Myocastor coypus	Nonruminant	Hindgut	Rod_hyst_7	38	Pelleted lucerne	Respiration chamber	Nutria2				1	1.95	41.6463	0.0416463	25.2378	12.512	87.488	15.65	30.81	49.19	35.7		17924.6	36.4355	20.4858	14.8677	746.494	452.377	60.7419	58.5948		45.2256		55.6645	25.2968	21.3493	9.26484		5.61451	415.532	251.813	1.79218	0.919068	1.36385	70.9166	9.49997
Hagen et al. (2019)	Eur J Wildl Res	Nutria	Myocastor coypus	Nonruminant	Hindgut	Rod_hyst_7	38	Pelleted lucerne	Respiration chamber	Nutria4				1	1.89	35.4714	0.0354714	22.0055	12.512	87.488	15.65	30.81	49.19	35.7		17924.6	31.0332	17.4484	12.6633	635.81	394.44	61.5412	59.3449		45.8212		56.9783	21.8295	18.4166	7.99506		4.95993	362.274	224.745	1.91818	1.01491	1.45974	75.9025	11.9379
Franz et al. (2011ab)	Comp Biochem Physiol A / J Anim Physiol Anim Nutr	Guinea pig	Cavia porcellus	Nonruminant	Hindgut	Rod_hyst_1	39	Grass hay	Respiration chamber	MS5				1	0.652	51.9325	0.0519325	71.5737	6.9721	93.0279	6.93952		63.3014	35.3462	2.21069	16438.5	48.3117	32.874	18.3562	853.693	1176.57	61.6746	62.543	33.2849	55.5605	51.7385	58.6239	32.0292	30.2156	18.265	9.49721	25.1729	500.469	689.749	0.18	0.276074	0.13698	7.12175	0.834228
Franz et al. (2011ab)	Comp Biochem Physiol A / J Anim Physiol Anim Nutr	Guinea pig	Cavia porcellus	Nonruminant	Hindgut	Rod_hyst_1	39	Grass hay	Respiration chamber	MS6				1	0.78	53.3297	0.0533297	64.2537	6.8251	93.1749	7.16494		63.4793	35.0686	2.39124	16423	49.6899	33.8533	18.7019	875.835	1055.24	58.3878	59.2072	24.5572	50.698	42.4619	53.6515	31.138	29.42	17.1629	7.94121	20.6786	469.898	566.152	0.34	0.435897	0.25874	13.4522	1.53593
Franz et al. (2011ab)	Comp Biochem Physiol A / J Anim Physiol Anim Nutr	Guinea pig	Cavia porcellus	Nonruminant	Hindgut	Rod_hyst_1	39	Grass hay	Respiration chamber	MS3				1	0.81	53.1717	0.0531717	62.2754	6.9462	93.0538	7.1206		63.1439	35.2512	2.28803	16382.5	49.4783	33.5747	18.7436	871.083	1020.22	59.6637	60.8868	37.8579	54.23	48.2453	56.8687	31.7242	30.1257	18.2075	9.04292	21.3249	495.374	580.189	0.21	0.259259	0.15981	8.3087	0.953836
Franz et al. (2011ab)	Comp Biochem Physiol A / J Anim Physiol Anim Nutr	Guinea pig	Cavia porcellus	Nonruminant	Hindgut	Rod_hyst_1	39	Grass hay	Respiration chamber	MS4				1	0.808	55.4972	0.0554972	65.1197	6.92367	93.0763	7.10647		63.7112	35.7686	2.34999	16550.5	51.6547	35.3579	19.8506	918.506	1077.76	61.8314	62.3995	42.8529	56.4104	48.5765	54.7041	34.3147	32.2323	19.9455	9.64271	23.4038	502.46	589.581	0.305	0.377475	0.232105	12.0674	1.31381
Franz et al. (2011ab)	Comp Biochem Physiol A / J Anim Physiol Anim Nutr	Guinea pig	Cavia porcellus	Nonruminant	Hindgut	Rod_hyst_1	39	Grass hay	Respiration chamber	MS1				1	0.83	36.4329	0.0364329	41.8972	4.47522	95.5248	6.64655		63.1473	33.7818	2.4075	16441.2	34.8024	23.0064	12.3077	599.002	688.842	58.3572	60.1061	32.2092	50.5871	41.4962	54.6304	21.2612	20.9184	11.6383	5.10723	13.3838	327.237	376.317	0.13	0.156627	0.09893	5.14348	0.858676
Franz et al. (2011ab)	Comp Biochem Physiol A / J Anim Physiol Anim Nutr	Guinea pig	Cavia porcellus	Nonruminant	Hindgut	Rod_hyst_1	39	Grass hay	Respiration chamber	MS2				1	0.86	46.2333	0.0462333	51.7703	5.95094	94.0491	6.4966		63.3512	35.2362	2.44402	16608.3	43.482	29.2893	16.2908	767.859	859.82	67.1972	68.5212	36.3292	62.8638	56.3667	64.7727	31.0675	29.7944	18.4124	9.18262	20.6175	497.363	556.929	0.165	0.19186	0.125565	6.52827	0.850191
This study		Guinea pig	Cavia porcellus	Nonruminant	Hindgut	Rod_hyst_1	39	Lucerne hay & pelleted lucerne	Respiration chamber	CP1	MSW 1 / satain butt			1	0.856	29.5724	0.0295724	33.2301	9.80218	90.1978	19.4966		39.9484	29.4302		18915.9	26.6737	11.8137	8.70322	559.39	628.578	49.4722	46.4909	57.524			43.7045	14.6301	12.4008				244.478	274.717	0.339835	0.397003	0.243322	13.1006	2.34195
This study		Guinea pig	Cavia porcellus	Nonruminant	Hindgut	Rod_hyst_1	39	Lucerne hay & pelleted lucerne	Respiration chamber	CP3	MSW 3 /crested weiss			1	0.85	32.6716	0.0326716	36.9068	11.3291	88.6709	20.3786		41.7167	31.2849		18552.3	28.9702	13.6295	10.2213	606.132	684.705	55.4323	52.7002	65.0023			50.3882	18.1106	15.2674				305.42	345.011	0.513535	0.604159	0.367691	19.7968	3.26608
This study		Guinea pig	Cavia porcellus	Nonruminant	Hindgut	Rod_hyst_1	39	Lucerne hay & pelleted lucerne	Respiration chamber	CP2	MSW 2 / schw. Rot weiss rosette			1	0.724	30.7475	0.0307475	39.1747	11.5342	88.4658	19.7172		41.3405	29.748		18604.7	27.201	12.7112	9.14675	572.046	728.831	57.8855	55.8722	62.5957			52.4423	17.7983	15.1978				299.994	382.216	0.6139	0.847928	0.439552	23.6658	4.13705
This study		Guinea pig	Cavia porcellus	Nonruminant	Hindgut	Rod_hyst_1	39	Lucerne hay & pelleted lucerne	Respiration chamber	CP6	MSW 6/ creme glatthaar			1	0.934	34.5773	0.0345773	36.3941	11.6923	88.3077	20.1685		42.6589	31.6256		18379.2	30.5344	14.7503	10.9353	635.504	668.896	52.6513	49.4714	64.2239			47.0902	18.2054	15.1058				299.26	314.984	0.457477	0.489804	0.327553	17.6357	2.77507
This study		Guinea pig	Cavia porcellus	Nonruminant	Hindgut	Rod_hyst_1	39	Lucerne hay & pelleted lucerne	Respiration chamber	CP5	MSW 5 scholw buff weiss teddy			1	0.774	30.4879	0.0304879	36.9464	11.4452	88.5548	21.4613		41.1212	29.8993		18632.2	26.9985	12.537	9.11568	568.057	688.392	53.945	50.8101	52.9346			48.4341	16.4467	13.718				275.133	333.416	0.329193	0.425314	0.235702	12.6904	2.234
This study		Guinea pig	Cavia porcellus	Nonruminant	Hindgut	Rod_hyst_1	39	Lucerne hay & pelleted lucerne	Respiration chamber	CP4	MSW 4 / lilac gold weiss rosette			1	0.838	18.7811	0.0187811	21.4431	14.342	85.658	18.7421		36.7934	20.9411		18639.7	16.0875	6.9102	3.93297	350.074	399.693	55.0655	51.2129	61.7115			49.4692	10.3419	8.23887				173.179	197.725	0.334388	0.399031	0.239422	12.8907	3.68227
Hagen et al. (2016) & this study	J Anim Physiol Anim Nutr	Chinchilla	Chinchilla laniger	Nonruminant	Hindgut	Rod_hyst_2	40	Grass hay & chinchilla pellet	Respiration chamber	CL4	CHIN 4 / pastelle ebony homo			1	0.526	28.0954	0.0280954	45.4879	9.94031	90.0597	19.2926		43.2014	19.4426		18392.4	25.3026	12.1376	5.46248	516.74	836.629	55.5185	59.4002	66.8149	36.1192	13.398	58.1101	15.5981	15.0298	4.384	0.731865	7.09792	300.278	486.166	0.305204	0.580235	0.218526	11.7656	2.27689
Hagen et al. (2016) & this study	J Anim Physiol Anim Nutr	Chinchilla	Chinchilla laniger	Nonruminant	Hindgut	Rod_hyst_2	40	Grass hay & chinchilla pellet	Respiration chamber	CL1	CHIN 1 / pink white			1	0.547	19.5452	0.0195452	30.729	9.69755	90.3025	17.5094		46.9337	20.9185		18338.2	17.6498	9.17328	4.08855	358.423	563.515	60.7217	62.788	65.5646	48.0189	31.7274	60.0109	11.8682	11.0819	4.40491	1.29719	6.92543	215.093	338.171	0.209132	0.382326	0.149739	8.06205	2.24931
Hagen et al. (2016) & this study	J Anim Physiol Anim Nutr	Chinchilla	Chinchilla laniger	Nonruminant	Hindgut	Rod_hyst_2	40	Grass hay & chinchilla pellet	Respiration chamber	CL2	CHIN 2 / white violett			1	0.459	23.1325	0.0231325	41.4823	9.56057	90.4394	20.1641		47.9146	21.8052		18369.9	20.9209	11.0838	5.04408	424.941	762.025	66.9074	68.546	67.9036	57.0004	46.7458	66.7585	15.4773	14.3404	6.31783	2.3579	11.3294	283.684	508.716	0.24764	0.53952	0.17731	9.54652	2.24655
Hagen et al. (2016) & this study	J Anim Physiol Anim Nutr	Chinchilla	Chinchilla laniger	Nonruminant	Hindgut	Rod_hyst_2	40	Grass hay & chinchilla pellet	Respiration chamber	CL5	CHIN 5 / weiss ebony			1	0.689	20.2119	0.0202119	26.7266	10.1558	89.8442	20.7186		43.7754	19.7109		18349.4	18.1593	8.84785	3.98395	370.878	490.418	61.6459	64.8175	76.4194	45.4305	23.0423	63.9945	12.4598	11.7704	4.01963	0.917996	5.31522	237.342	313.841	0.205046	0.297599	0.146813	7.90452	2.1313
Hagen et al. (2016) & this study	J Anim Physiol Anim Nutr	Chinchilla	Chinchilla laniger	Nonruminant	Hindgut	Rod_hyst_2	40	Grass hay & chinchilla pellet	Respiration chamber	CL3	CHIN 3 / standard			1	0.489	29.3826	0.0293826	50.2468	9.78546	90.2145	19.4508		45.3291	21.3435		18340.1	26.5074	13.3188	6.27126	538.881	921.533	61.0561	64.2838	65.1694	53.2429	38.9223	62.9317	17.9399	17.0399	7.09134	2.44092	12.1268	339.127	579.937	0.290186	0.593427	0.207773	11.1867	2.07591
Hagen et al. (2016) & this study	J Anim Physiol Anim Nutr	Chinchilla	Chinchilla laniger	Nonruminant	Hindgut	Rod_hyst_2	40	Grass hay & chinchilla pellet	Respiration chamber	CL6	CHIN 6 / standard			1	0.591	24.4089	0.0244089	36.2124	9.82874	90.1713	19.8636		45.6445	20.5216		18303.5	22.0098	11.1413	5.0091	446.768	662.813	64.8178	66.7115	76.8994	52.9352	31.3909	65.7448	15.8213	14.6831	5.89767	1.5724	8.74964	293.727	435.765	0.110531	0.187024	0.0791401	4.26097	0.953732
This study		Degu	Octodon degus	Nonruminant	Hindgut	Rod_hyst_8	41	Pelleted lucerne	Respiration chamber	Degu1				1	0.151	13.5177	0.0135177	55.8046	12.3726	87.6274	15.48	30.81	49.15	35.97		17965.4	11.8452	6.64395	4.86232	242.851	1002.55	41.9214	41.5635		21.1386		38.7961	5.66681	4.92328	1.40444		5.79788	94.2166	388.951	0.406318	2.69085	0.309208	16.078	6.62053
This study		Degu	Octodon degus	Nonruminant	Hindgut	Rod_hyst_8	41	Pelleted lucerne	Respiration chamber	Degu3				1	0.1585	16.5509	0.0165509	65.8871	12.3726	87.6274	15.48	30.81	49.15	35.97		17965.4	14.5032	8.13479	5.95337	297.344	1183.69	54.1014	52.6224		38.3145		50.1935	8.95429	7.63191	3.11681		12.4076	149.247	594.135	0.471022	2.97175	0.358448	18.6383	6.26827
This study		Degu	Octodon degus	Nonruminant	Hindgut	Rod_hyst_8	41	Pelleted lucerne	Respiration chamber	Degu4				1	0.137	12.7547	0.0127547	56.6408	12.3726	87.6274	15.48	30.81	49.15	35.97		17965.4	11.1766	6.26893	4.58786	229.143	1017.57	38.1066	41.3387		18.1363		35.4874	4.86037	4.62026	1.13695		5.04894	81.3168	361.11	0.496986	3.62763	0.378206	19.6657	8.5823
This study		Degu	Octodon degus	Nonruminant	Hindgut	Rod_hyst_8	41	Pelleted lucerne	Respiration chamber	Degu5				1	0.151	10.9084	0.0109084	45.0326	12.3726	87.6274	15.48	30.81	49.15	35.97		17965.4	9.55871	5.36146	3.92374	195.973	809.028	38.9663	35.5557		17.7759		33.1035	4.25058	3.39867	0.953046		3.93442	64.8739	267.817	0.316681	2.09722	0.240994	12.5311	6.39428
This study		Degu	Octodon degus	Nonruminant	Hindgut	Rod_hyst_8	41	Lucerne hay & pelleted lucerne	Respiration chamber	OD1	DEGU 1			1	0.137	8.75033	0.00875033	38.8583	14.7048	85.2952	31.9253		14.1565	6.58764		19648.4	7.46361	1.23874	0.57644	171.93	763.505	48.4149	44.4383	69.7677			46.3083	4.23646	3.3167				79.618	353.566	0.0646729	0.472065	0.0492161	12.5311	7.28845
This study		Degu	Octodon degus	Nonruminant	Hindgut	Rod_hyst_8	41	Lucerne hay & pelleted lucerne	Respiration chamber	OD2	DEGU 2			1	0.143	8.09912	0.00809912	34.8286	14.1031	85.8969	30.011		15.6898	8.24904		19829.7	6.95689	1.27073	0.668099	160.603	690.64	50.2369	47.1301	67.6087			48.0713	4.06874	3.27879				77.2039	331.999	0.0491285	0.343556	0.0373868	12.5311	7.8025
This study		Degu	Octodon degus	Nonruminant	Hindgut	Rod_hyst_8	41	Lucerne hay & pelleted lucerne	Respiration chamber	OD3	DEGU 3			1	0.186	8.60302	0.00860302	30.375	14.3253	85.6747	32.0026		16.931	6.69934		19886.6	7.37062	1.45658	0.576345	171.085	604.056	42.4326	38.6285	64.6675			41.1582	3.65049	2.84716				70.4156	248.619	0.0342371	0.184071	0.0260545	12.5311	7.32446
This study		Degu	Octodon degus	Nonruminant	Hindgut	Rod_hyst_8	41	Lucerne hay & pelleted lucerne	Respiration chamber	OD4	DEGU 4			1	0.183	8.78368	0.00878368	31.3934	13.4175	86.5825	26.6274		20.0736	13.6664		19703.1	7.60513	1.7632	1.20041	173.066	618.549	55.5613	53.2732	66.6999			53.8843	4.88033	4.0515				93.2555	333.301	0.035038	0.191464	0.0266639	12.5311	7.24062
This study		Degu	Octodon degus	Nonruminant	Hindgut	Rod_hyst_8	41	Lucerne hay & pelleted lucerne	Respiration chamber	OD6	DEGU 6			1	0.193	10.7876	0.0107876	37.0474	13.459	86.541	28.2869		18.6228	10.1842		19667	9.33572	2.00896	1.09864	212.161	728.613	37.0871	33.1361	57.537			34.4653	4.00082	3.09349				73.1218	251.119	0.0284159	0.147233	0.0216245	12.5311	5.9064
This study		Degu	Octodon degus	Nonruminant	Hindgut	Rod_hyst_8	41	Pelleted lucerne	Respiration chamber	Degu6				1	0.186	17.1444	0.0171444	60.5324	12.3726	87.6274	15.48	30.81	49.15	35.97		17965.4	15.0232	8.42647	6.16684	308.006	1087.49	50.0737	48.1578		29.4461		45.5509	8.58483	7.23483	2.48127		8.7607	140.3	495.361	0.375431	2.01845	0.285703	14.8558	4.82323
This study & Hagen et al. (2018)	Mamm Biol	Field vole	Microtus agrestis	Nonruminant	Hindgut	Rod_myom_2	42	Pelleted lucerne	Respiration chamber	MA2				1	0.02657	9.95953	0.00995953	151.337	12.3755	87.6245	15.4378	30.1863	49.0025	35.7046		18031.2	8.72699	4.88042	3.55601	179.583	2728.8	50.1549	49.0636		32.241		46.1889	4.99519	4.28177	1.5735		23.9096	82.9473	1260.4	0.0534279	2.01084	0.0406586	2.11389	1.17711
This study & Hagen et al. (2018)	Mamm Biol	Field vole	Microtus agrestis	Nonruminant	Hindgut	Rod_myom_2	42	Pelleted lucerne	Respiration chamber	MA3				1	0.02441	8.64934	0.00864934	140.058	12.373	87.627	15.4358	30.1645	48.9912	35.6875		18031.8	7.57916	4.23742	3.08673	155.963	2525.5	51.1453	50.4315		32.919		48.477	4.42374	3.82228	1.39491		22.5877	75.6065	1224.29	0.0502065	2.0568	0.0382071	1.98643	1.27365
This study & Hagen et al. (2018)	Mamm Biol	Field vole	Microtus agrestis	Nonruminant	Hindgut	Rod_myom_2	42	Pelleted lucerne	Respiration chamber	MA1				1	0.02724	10.5811	0.0105811	157.807	12.3153	87.6847	15.3898	29.6619	48.7312	35.2938		18045.3	9.27804	5.15632	3.73448	190.94	2847.68	54.9733	53.7372		39.1222		52.1671	5.81681	4.98576	2.01727		30.0856	99.6077	1485.55	0.0367871	1.35048	0.027995	1.45549	0.762278
This study & Hagen et al. (2018)	Mamm Biol	Field vole	Microtus agrestis	Nonruminant	Hindgut	Rod_myom_2	42	Pelleted lucerne	Respiration chamber	MA6				1	0.02077	10.1393	0.0101393	185.323	12.326	87.674	15.3983	29.7549	48.7793	35.3666		18042.8	8.8895	4.94586	3.58591	182.941	3343.74	62.2971	61.5865		47.9202		59.6471	6.31647	5.47473	2.37006		43.3194	109.119	1994.44	0.0479275	2.30754	0.0364729	1.89627	1.03655
This study & Hagen et al. (2018)	Mamm Biol	Field vole	Microtus agrestis	Nonruminant	Hindgut	Rod_myom_2	42	Pelleted lucerne	Respiration chamber	MA4				1	0.03023	9.0941	0.0090941	125.439	12.3789	87.6211	15.4405	30.2163	49.018	35.728		18030.4	7.96835	4.45774	3.24914	163.971	2261.71	52.0536	51.148		33.054		49.1157	4.73381	4.07565	1.47346		20.324	80.5353	1110.86	0.0332745	1.10071	0.0253219	1.31652	0.802897
This study & Hagen et al. (2018)	Mamm Biol	Field vole	Microtus agrestis	Nonruminant	Hindgut	Rod_myom_2	42	Pelleted lucerne	Respiration chamber	MA5				1	0.04231	10.4794	0.0104794	112.332	12.3802	87.6198	15.4416	30.228	49.0241	35.7372		18030.1	9.18204	5.13744	3.74506	188.945	2025.37	53.5759	52.4395		35.8791		51.0253	5.61444	4.81502	1.84326		19.7586	96.41	1033.45	0.0494411	1.16854	0.0376247	1.95615	1.0353
This study & Hagen et al. (2018)	Mamm Biol	Steppe lemming	Lagurus lagurus	Nonruminant	Hindgut	Rod_myom_1	43	Pelleted lucerne	Respiration chamber	LL5				1	0.01715	6.3632	0.0063632	134.269	12.3802	87.6198	15.4416	30.228	49.0241	35.7372		18030.1	5.57542	3.1195	2.27403	114.729	2420.9	51.1178	49.355		33.9637		48.0818	3.25272	2.75175	1.0595		22.3564	55.1639	1164.01	0.0449276	2.61968	0.0341899	1.77757	1.54936
This study & Hagen et al. (2018)	Mamm Biol	Steppe lemming	Lagurus lagurus	Nonruminant	Hindgut	Rod_myom_1	43	Pelleted lucerne	Respiration chamber	LL3				1	0.020895	6.40704	0.00640704	116.58	12.3802	87.6198	15.4416	30.228	49.0241	35.7372		18030.1	5.61383	3.14099	2.2897	115.52	2101.96	48.8138	47.1858		30.4029		46.1881	3.12752	2.64893	0.954953		17.376	53.3564	970.856	0.0459542	2.19929	0.0349711	1.81819	1.57392
This study & Hagen et al. (2018)	Mamm Biol	Steppe lemming	Lagurus lagurus	Nonruminant	Hindgut	Rod_myom_1	43	Pelleted lucerne	Respiration chamber	LL6				1	0.02025	6.34076	0.00634076	118.12	12.3802	87.6198	15.4416	30.228	49.0241	35.7372		18030.1	5.55576	3.1085	2.26601	114.325	2129.71	48.7153	47.5816		34.7585		46.9393	3.08892	2.64352	1.08047		20.1277	53.6632	999.673	0.0441207	2.1788	0.0335758	1.74565	1.52692
This study & Hagen et al. (2018)	Mamm Biol	Steppe lemming	Lagurus lagurus	Nonruminant	Hindgut	Rod_myom_1	43	Pelleted lucerne	Respiration chamber	LL1				1	0.02291	7.47012	0.00747012	126.855	12.3802	87.6198	15.4416	30.228	49.0241	35.7372		18030.1	6.5453	3.66216	2.66962	134.687	2287.22	49.5718	48.0863		36.556		47.0833	3.70308	3.1474	1.33874		22.7341	63.4152	1076.9	0.0375818	1.64041	0.0285998	1.48693	1.10399
This study & Hagen et al. (2018)	Mamm Biol	Steppe lemming	Lagurus lagurus	Nonruminant	Hindgut	Rod_myom_1	43	Pelleted lucerne	Respiration chamber	LL4				1	0.0188	6.23015	0.00623015	122.71	12.3802	87.6198	15.4416	30.228	49.0241	35.7372		18030.1	5.45884	3.05427	2.22649	112.33	2212.48	49.6824	47.6069		32.2546		46.7386	3.09529	2.59879	0.985145		19.4036	52.5017	1034.08	0.0353047	1.87791	0.0268669	1.39684	1.24351
This study & Hagen et al. (2018)	Mamm Biol	Steppe lemming	Lagurus lagurus	Nonruminant	Hindgut	Rod_myom_1	43	Pelleted lucerne	Respiration chamber	LL2				1	0.01904	6.50399	0.00650399	126.891	12.3802	87.6198	15.4416	30.228	49.0241	35.7372		18030.1	5.69878	3.18852	2.32435	117.268	2287.86	48.6376	47.3804		31.48		45.7227	3.16339	2.70011	1.00375		19.5828	53.618	1046.07	0.048151	2.52894	0.0366429	1.90511	1.62458
*note that for average values, those from the paper (Galbraith et al. 1998, Can J Anim Sci) were used
[truncated: 22 more columns]

## Sheet: Key
Source	Authors		like an in-text citation
	Source_journal		journal name
Species	Common_name		common species name
	Species		Latin genus and species name
Digestion type	Ruminant_Nonruminant		digestion type classification (note that there are nonruminant foregut fermenters)
Digestion	Foregut_Hindgut_Fermenter		digestion type classification (note that foregut fermenters include both ruminants and nonruminant foregut fermenters)
Sorting help	Sorting_name		these columns are used for sorting purposes
	Sorting_no		these columns are used for sorting purposes
Diet	Diet		description of the diet used in the experiment
Method	Measurement		method of measuring methane
Details	Details_1		details, e.g. names of the experimental groups or the individual animals in the publication
	Details_2		details, e.g. names of the experimental groups or the individual animals in the publication
	Details_3		details, e.g. names of the experimental groups or the individual animals in the publication
	Details_4		details, e.g. names of the experimental groups or the individual animals in the publication
	n		if possible, this is the sample size of the animals for which the data is representative
Body mass	BodyMass_kg		body mass in kg
Intake	DMI_g/d		dry matter intake
	DMI_kg/d		dry matter intake
	rDMI_g/MBW/d		relative dry matter intake (per metabolic body weight)
Food composition	Ash_przDM		total ash	in % dry matter
	OM_przDM		organic matter	in % dry matter
	Prot_przDM		crude protein	in % dry matter
	CrudeFib_przDM		crude fibre	in % dry matter
	NDF_przDM		neutral detergent fibre	in % dry matter
	ADF_przDM		acid detergent fibre	in % dry matter
	ADL_przDM		acid detergent lignin	in % dry matter
	GE_kJ/kgDM		gross energy	in kJ per kg dry matter
Intake	OMI_g/d		organic matter intake
	NDFI_g/d		NDF intake
	ADFI_g/d		ADF intake
	GEI_kJ/d		gross energy intake
	rGEI_kJ/MBW		relative gross energy intake (per metabolic body weight)
Apparent digestibility (aD)	aD_DM		of dry matter
	aD_OM		of organic matter
	aD_N		of protein /nitrogen
	aD_NDF		of NDF
	aD_ADF		of ADF
	aD_GE		of gross energy
Digestible intake	dDMI_g/d		digestible dry matter intake
	dOMI_g/d		digestible organic matter intake
	dNDFI_g/d		digestible NDF intake
	dADFI_g/d		digestible ADF intake
	rdNDFI_g/MBW/d		relative digestible NDF intake (per metabolic body weight)
	DIE_kJ/d		digestible energy intake
	rDEI_kJ/MBW/d		relative digestible energy intake (per metabolic body weight)
Methane	CH4_L/d		methane in litres per day
	CH4_L/kgBM		methane in litres per kg body mass
	CH4_g/d		methane in grams per day
	CH4_kJ/d		methane in kJ per day
Methane per energy	CH4_przGEI		methane yield (in % gross energy)
	CH4_przDEI		methane yield (in % digestible energy)
Methane per intake	CH4_L/kgDMI		methane yield (per dry matter intake)
	CH4_L/kgOMI		methane yield (per organic matter intake)
	CH4_g/kgDMI		methane yield (per dry matter intake)
	CH4_g/kgOMI		methane yield (per organic matter intake)
Methane per digestible intake	CH4_L/kgdDMI		methane yield (per digestible dry matter intake)
	CH4_L/kgdOMI		methane yield (per digestible organic matter intake)
	CH4_L/kgdNDFI		methane yield (per digestible NDF intake)
	CH4_L/kgdADFI		methane yield (per digestible ADF intake)
	CH4_g/kgdDMI		methane yield (per digestible dry matter intake)
	CH4_g/kgdOMI		methane yield (per digestible organic matter intake)
	CH4_g/kgdNDFI		methane yield (per digestible NDF intake)
	CH4_g/kgdADFI		methane yield (per digestible ADF intake)
CO2	CO2_L/d		carbon dioxide in litres per day
	CH4/CO2		methane:carbon dioxide ratio (litres per litres)
Mean retention time (MRT) gastrointestinal tract	MRTfluidGIT_h		mean retention time of a solute marker in the gastrointestinal tract
	MRTparticleGIT_h		mean retention time of a small particle marker in the gastrointestinal tract
MRT particle:MRT fluid GIT	SF_GIT		ratio of MRT small particles : MRT solute marker in the gastrointestinal tract
MRT forestomach (RR)	MRTfluidRR_h		mean retention time of a solute marker in the reticulorumen
	MRTRRparticle_h		mean retention time of a small particle marker in the reticulorumen
MRT particle:MRT fluid RR	SF_RR		ratio of MRT small particles : MRT solute marker in the reticulorumen
Dry matter gut fill	DMC_kg		dry matter gut fill calculated using the occupancy principle, from dry matter intake, dry matter digestibility, and small particle mean retention time
